# Supplementary material for: WRKY Transcription Factors in Cassava Contribute to Regulation of Tolerance and Susceptibility to Cassava Mosaic Disease through Stress Responses
Source: MDPI journal article supplement (doi:10.3390/v13091820), 2021-09-13
Supplement: s1 [file s1]

### **Supplementary Figure Legends**

**Figure S1** Predicted protein-protein interactions between AtWRKY homologs of differentially expressed MeWRKYs and their interacting partners in a central AtWRKY 33, and 53, 40 and 70 protein-protein network (A) T200 and (B) TME3 at 12 dpi. Networks were created using STRING v.11.

**Figure S2** Predicted protein-protein interactions between AtWRKY homologs of differentially expressed MeWRKYs and their interacting partners in a central AtWRKY 33, and 53, 40 and 70 protein-protein network (A) T200 and (B) TME3 at 67 dpi. Networks were created using STRING v.11.

**Figure S3** Upregulated gene partners in enriched hormone pathways associated with differentially expressed (up-regulated) AtWRKY homologs in (A) T200 at 12 dpi (B) T200 at 32 dpi (C) T200 at 67 dpi, and (D) TME3 at 32 dpi. Networks were visualised using Cytoscape v.3.6.1.

**Figure S4** Resistance protein RPW8-NBS interacting protein partners identified using STRING v.11.
