# Supplementary material for: WRKY Transcription Factors in Cassava Contribute to Regulation of Tolerance and Susceptibility to Cassava Mosaic Disease through Stress Responses
Source: Viruses. 2021 Sep 13;13(9):1820. doi: 10.3390/v13091820 (PMC8473359; doi:10.3390/v13091820)
Supplement: Supplementary file 1 [file viruses-13-01820-s001.zip]

Archive with 16 entries (16 files):
- Final Supplementary Tables, Figures and Legends/Figure S1A.png
- Final Supplementary Tables, Figures and Legends/Figure S1B.png
- Final Supplementary Tables, Figures and Legends/Figure S2A.png
- Final Supplementary Tables, Figures and Legends/Figure S2B.png
- Final Supplementary Tables, Figures and Legends/Figure S3A.png
- Final Supplementary Tables, Figures and Legends/Figure S3B.png
- Final Supplementary Tables, Figures and Legends/Figure S3C.png
- Final Supplementary Tables, Figures and Legends/Figure S3D.png
- Final Supplementary Tables, Figures and Legends/Figure S4.png
- Final Supplementary Tables, Figures and Legends/Supplementary Figure Legends.pdf
- Final Supplementary Tables, Figures and Legends/Supplementary Table Legends.pdf
- Final Supplementary Tables, Figures and Legends/Supplementary Table S1.xlsx
- Final Supplementary Tables, Figures and Legends/Supplementary Table S2.xlsx
- Final Supplementary Tables, Figures and Legends/Supplementary Table S3.xlsx
- Final Supplementary Tables, Figures and Legends/Supplementary Table S4.xlsx
- Final Supplementary Tables, Figures and Legends/Supplementary Table S5.xlsx
