# Supplementary material for: WRKY Transcription Factors in Cassava Contribute to Regulation of Tolerance and Susceptibility to Cassava Mosaic Disease through Stress Responses
Source: Viruses. 2021 Sep 13;13(9):1820. doi: 10.3390/v13091820 (PMC8473359; doi:10.3390/v13091820)
Supplement: Supplementary file 1 [file viruses-13-01820-s001.zip › Final Supplementary Tables, Figures and Legends/Supplementary Table S1.xlsx]

## Sheet: Summary
Supplementary Table S1 Log2 relative change [ddc(t)] in WRKY expression and primer sequences
Significance value p< 0.5
		Two tailed T-test						Two tailed T-test						Two tailed T-test
		T200						T200	7.01855e-06					T200	0.000317863
		TME3	0.0356293					TME3	0.155673					TME3	0.674985
			Two tailed T-test
			T200	0.44701
			TME3	0.00374063
Primers
MeWRKY18/59
For: 5'-GACTGCTGAGGATCTTGTAGTG-3'
Rev: 5'-CCGCATCAGTCTCAACTCTATT-3'
MeWRKY11
For: 5'-GGCGGCGTCTATGGATTATT-3'
Rev: 5'-TCGTTAGGACGTCGAGGATTA-3'
MeWRKY3
For: 5'-AGAGAAAGACAATGCCCAGATG-3'
Rev: 5'-TGCATCTGTAATAGCTTCTGGG-3'
MeWRKY70
For5'-GAAAACATGTCGAACGAGCG-3'
Rev: 5'-GGATGGAGGTCTGTTGGATG-3'
