# Supplementary material for: WRKY Transcription Factors in Cassava Contribute to Regulation of Tolerance and Susceptibility to Cassava Mosaic Disease through Stress Responses
Source: Viruses. 2021 Sep 13;13(9):1820. doi: 10.3390/v13091820 (PMC8473359; doi:10.3390/v13091820)
Supplement: Supplementary file 1 [file viruses-13-01820-s001.zip › Final Supplementary Tables, Figures and Legends/Supplementary Table S2.xlsx]

## Sheet: All_GOs
Supplementary Table S2 All Gene Ontology terms (biological processes) (p value<0.05) associated with T200 and TME3 at 12, 32 and 67 dpi with SACMV
Plant	Expression	Timepoint	ID	Description	Ratio	BgRatio	pvalue	p.adjust	qvalue	geneID	Count
T200	Down	12	GO:0048509	regulation of meristem development	0.0941176	224/20450	4.26465e-06	0.00196729	0.00188661	815145/818649/818884/829788/830022/830915/831124/836699	8
T200	Down	12	GO:0010075	regulation of meristem growth	0.0823529	171/20450	7.21027e-06	0.00196729	0.00188661	815145/818649/818884/829788/830022/830915/836699	7
T200	Down	12	GO:0035266	meristem growth	0.0823529	179/20450	9.72303e-06	0.00196729	0.00188661	815145/818649/818884/829788/830022/830915/836699	7
T200	Down	12	GO:0009414	response to water deprivation	0.105882	418/20450	5.96752e-05	0.00837822	0.00803461	815949/817608/827612/827956/838122/841122/842797/843296/844174	9
T200	Down	12	GO:0009415	response to water	0.105882	426/20450	6.90134e-05	0.00837822	0.00803461	815949/817608/827612/827956/838122/841122/842797/843296/844174	9
T200	Down	12	GO:0048638	regulation of developmental growth	0.0823529	277/20450	0.000155491	0.0157305	0.0150853	815145/818649/818884/829788/830022/830915/836699	7
T200	Down	12	GO:0010073	meristem maintenance	0.0823529	285/20450	0.000185195	0.0160591	0.0154004	815145/818649/818884/829788/830022/830915/836699	7
T200	Down	12	GO:0040008	regulation of growth	0.0823529	306/20450	0.000285519	0.0216637	0.0207752	815145/818649/818884/829788/830022/830915/836699	7
T200	Up	12	GO:0010200	response to chitin	0.123596	421/20450	6.13322e-06	0.00245172	0.00209589	818429/818588/820924/823815/824011/825319/828481/829880/835193/838504/838981	11
T200	Up	12	GO:0010243	response to organonitrogen compound	0.123596	443/20450	9.90593e-06	0.00245172	0.00209589	818429/818588/820924/823815/824011/825319/828481/829880/835193/838504/838981	11
T200	Up	12	GO:0009611	response to wounding	0.101124	335/20450	3.62197e-05	0.00597626	0.00510889	820321/820924/823815/824011/827912/829567/835193/838981/839748	9
T200	Up	12	GO:0009612	response to mechanical stimulus	0.0449438	63/20450	0.000247266	0.0252721	0.0216042	820924/823815/835193/838981	4
T200	Up	12	GO:0002679	respiratory burst involved in defense response	0.0561798	121/20450	0.000306328	0.0252721	0.0216042	818429/820924/823815/835193/838981	5
T200	Up	12	GO:0045730	respiratory burst	0.0561798	121/20450	0.000306328	0.0252721	0.0216042	818429/820924/823815/835193/838981	5
T200	Down	32	GO:0009411	response to UV	0.0918367	247/20450	3.03471e-11	2.70089e-08	2.4661e-08	818030/818280/818827/820441/821151/821164/824287/824678/826851/827220/830000/830399/830693/831241/831354/834291/839687/842814	18
T200	Down	32	GO:0009718	anthocyanin-containing compound biosynthetic process	0.0510204	60/20450	2.584e-10	9.89514e-08	9.03495e-08	816620/819083/821164/824287/824678/828387/830693/831241/834291/842814	10
T200	Down	32	GO:0009813	flavonoid biosynthetic process	0.0816327	217/20450	3.33544e-10	9.89514e-08	9.03495e-08	816620/816695/818280/819083/821164/824287/824493/824678/827220/828387/830693/831241/832524/834291/835418/842814	16
T200	Down	32	GO:0009812	flavonoid metabolic process	0.0816327	244/20450	1.85334e-09	4.12369e-07	3.76521e-07	816620/816695/818280/819083/821164/824287/824493/824678/827220/828387/830693/831241/832524/834291/835418/842814	16
T200	Down	32	GO:0046283	anthocyanin-containing compound metabolic process	0.0510204	85/20450	8.7166e-09	1.55155e-06	1.41668e-06	816620/819083/821164/824287/824678/828387/830693/831241/834291/842814	10
T200	Down	32	GO:0010224	response to UV-B	0.0510204	104/20450	6.2115e-08	9.21373e-06	8.41277e-06	818280/818827/821164/824287/824678/827220/830693/831241/834291/842814	10
T200	Down	32	GO:0009743	response to carbohydrate	0.0765306	401/20450	7.98952e-06	0.00101581	0.000927505	815845/818614/821164/824287/824678/824896/825316/827220/830399/830693/831241/834291/835418/842814/843806	15
T200	Down	32	GO:0009698	phenylpropanoid metabolic process	0.0510204	183/20450	1.1189e-05	0.00124478	0.00113657	818280/824493/828387/830399/831241/837304/838136/838297/838847/842814	10
T200	Down	32	GO:0009744	response to sucrose	0.0510204	210/20450	3.66339e-05	0.0035333	0.00322614	818614/821164/824287/824678/827220/830693/831241/834291/842814/843806	10
T200	Down	32	GO:0034285	response to disaccharide	0.0510204	212/20450	3.96999e-05	0.0035333	0.00322614	818614/821164/824287/824678/827220/830693/831241/834291/842814/843806	10
T200	Down	32	GO:0046148	pigment biosynthetic process	0.0561224	267/20450	5.6256e-05	0.00423921	0.00387069	816620/816658/819083/821164/824287/824678/828387/830693/831241/834291/842814	11
T200	Down	32	GO:0009926	auxin polar transport	0.0357143	102/20450	5.71578e-05	0.00423921	0.00387069	818030/830000/830399/830729/831241/838138/839687	7
T200	Down	32	GO:0060918	auxin transport	0.0357143	106/20450	7.30397e-05	0.0048689	0.00444564	818030/830000/830399/830729/831241/838138/839687	7
T200	Down	32	GO:0009914	hormone transport	0.0357143	107/20450	7.75263e-05	0.0048689	0.00444564	818030/830000/830399/830729/831241/838138/839687	7
T200	Down	32	GO:0043473	pigmentation	0.0357143	113/20450	0.000109413	0.0048689	0.00444564	818030/821151/826851/830000/830399/831354/839687	7
T200	Down	32	GO:0043476	pigment accumulation	0.0357143	113/20450	0.000109413	0.0048689	0.00444564	818030/821151/826851/830000/830399/831354/839687	7
T200	Down	32	GO:0043478	pigment accumulation in response to UV light	0.0357143	113/20450	0.000109413	0.0048689	0.00444564	818030/821151/826851/830000/830399/831354/839687	7
T200	Down	32	GO:0043479	pigment accumulation in tissues in response to UV light	0.0357143	113/20450	0.000109413	0.0048689	0.00444564	818030/821151/826851/830000/830399/831354/839687	7
T200	Down	32	GO:0043480	pigment accumulation in tissues	0.0357143	113/20450	0.000109413	0.0048689	0.00444564	818030/821151/826851/830000/830399/831354/839687	7
T200	Down	32	GO:0043481	anthocyanin accumulation in tissues in response to UV light	0.0357143	113/20450	0.000109413	0.0048689	0.00444564	818030/821151/826851/830000/830399/831354/839687	7
T200	Down	32	GO:0080167	response to karrikin	0.0357143	128/20450	0.000237401	0.0100613	0.00918665	818030/818280/818596/824493/824678/826983/843806	7
T200	Down	32	GO:0007030	Golgi organization	0.0408163	177/20450	0.000316101	0.0127877	0.0116761	816605/817205/820938/825316/827055/830399/835657/837304	8
T200	Down	32	GO:0009828	plant-type cell wall loosening	0.0204082	35/20450	0.000339554	0.0131393	0.0119971	814838/822543/828940/843288	4
T200	Down	32	GO:0009699	phenylpropanoid biosynthetic process	0.0357143	139/20450	0.000392313	0.0145483	0.0132836	818280/824493/828387/830399/831241/838297/838847	7
T200	Down	32	GO:0042440	pigment metabolic process	0.0561224	346/20450	0.000531702	0.0189286	0.0172831	816620/816658/819083/821164/824287/824678/828387/830693/831241/834291/842814	11
T200	Down	32	GO:0010256	endomembrane system organization	0.0408163	195/20450	0.000601887	0.0206031	0.018812	816605/817205/820938/825316/827055/830399/835657/837304	8
T200	Down	32	GO:0006816	calcium ion transport	0.0306122	118/20450	0.000972582	0.0320592	0.0292723	817205/820938/825316/827055/830399/835657	6
T200	Down	32	GO:0009962	regulation of flavonoid biosynthetic process	0.0306122	122/20450	0.00115609	0.0358261	0.0327117	816620/816695/818280/824493/831241/835418	6
T200	Down	32	GO:0006949	syncytium formation	0.0153061	22/20450	0.00116737	0.0358261	0.0327117	814838/828940/843288	3
T200	Down	32	GO:0030243	cellulose metabolic process	0.0306122	124/20450	0.00125724	0.0372981	0.0340558	817205/822051/826851/830399/834321/843948	6
T200	Down	32	GO:0048638	regulation of developmental growth	0.0459184	277/20450	0.001458	0.0418589	0.03822	815145/818649/818884/822051/822195/830000/835526/835702/838677	9
T200	Down	32	GO:0052541	plant-type cell wall cellulose metabolic process	0.0153061	24/20450	0.00151279	0.0420746	0.038417	822051/834321/843948	3
T200	Down	32	GO:0010091	trichome branching	0.0153061	25/20450	0.00170703	0.0453529	0.0414103	818827/834133/835401	3
T200	Down	32	GO:0035266	meristem growth	0.0357143	179/20450	0.00173258	0.0453529	0.0414103	815145/818614/818649/818884/830000/835702/838677	7
T200	Up	32	GO:0010200	response to chitin	0.204878	421/20450	9.0144e-30	7.6983e-27	6.82248e-27	816913/817194/817778/818166/818319/818429/818588/818605/820355/820752/820924/821052/821134/821402/823706/823815/824608/825319/825399/827435/827463/828481/828559/828836/829536/829591/829918/832285/832750/833727/834770/835193/838314/838456/838501/838981/839666/842428/843500/844163/844423/28719408	42
T200	Up	32	GO:0010243	response to organonitrogen compound	0.204878	443/20450	7.16284e-29	3.05853e-26	2.71057e-26	816913/817194/817778/818166/818319/818429/818588/818605/820355/820752/820924/821052/821134/821402/823706/823815/824608/825319/825399/827435/827463/828481/828559/828836/829536/829591/829918/832285/832750/833727/834770/835193/838314/838456/838501/838981/839666/842428/843500/844163/844423/28719408	42
T200	Up	32	GO:0035556	intracellular signal transduction	0.165854	495/20450	6.03281e-19	1.71734e-16	1.52196e-16	816579/818166/818319/818429/818605/820355/820752/820924/821134/821575/822462/823706/823815/824761/827435/827463/828053/828481/828606/829591/832285/832750/833727/834210/834444/834770/835193/836843/837276/838501/838981/839666/844423/28719408	34
T200	Up	32	GO:0002679	respiratory burst involved in defense response	0.0926829	121/20450	1.27352e-17	2.17518e-15	1.92771e-15	818166/818319/818429/818605/820355/820752/820924/823815/824608/827435/827463/829591/832285/833727/834770/835193/838981/839666/844423	19
T200	Up	32	GO:0045730	respiratory burst	0.0926829	121/20450	1.27352e-17	2.17518e-15	1.92771e-15	818166/818319/818429/818605/820355/820752/820924/823815/824608/827435/827463/829591/832285/833727/834770/835193/838981/839666/844423	19
T200	Up	32	GO:0009611	response to wounding	0.131707	335/20450	6.23311e-17	8.8718e-15	7.86247e-15	816913/817194/817553/820321/820355/820924/822051/823650/823706/823815/828053/828559/828606/828836/830894/835193/837171/838314/838456/838501/838981/839666/842428/843500/843834/844423/28719408	27
T200	Up	32	GO:0009753	response to jasmonic acid	0.146341	474/20450	7.84944e-16	9.57632e-14	8.48684e-14	816579/817194/817674/818166/818429/820321/820355/820752/820924/821134/823650/823706/827435/828053/828481/828606/830894/832750/834210/835821/837171/837276/838314/838501/839666/842428/843500/843834/844423/28719408	30
T200	Up	32	GO:0008219	cell death	0.141463	496/20450	1.92592e-14	2.05592e-12	1.82203e-12	814657/816579/817194/817746/818166/818429/818605/820355/820924/821134/823706/824608/824761/827435/828053/828481/828606/829536/829918/832750/834210/837276/838456/838501/839808/842450/843834/844074/844423	29
T200	Up	32	GO:0009626	plant-type hypersensitive response	0.126829	400/20450	4.1423e-14	3.75046e-12	3.32377e-12	816579/817194/818166/818429/818605/820355/820924/821134/823706/824608/824761/827435/828053/828481/828606/829536/829918/832750/834210/837276/838456/838501/839808/843834/844074/844423	26
T200	Up	32	GO:0034050	host programmed cell death induced by symbiont	0.126829	401/20450	4.39164e-14	3.75046e-12	3.32377e-12	816579/817194/818166/818429/818605/820355/820924/821134/823706/824608/824761/827435/828053/828481/828606/829536/829918/832750/834210/837276/838456/838501/839808/843834/844074/844423	26
T200	Up	32	GO:0010941	regulation of cell death	0.121951	404/20450	3.98504e-13	3.09384e-11	2.74186e-11	816579/817194/817746/818166/818429/818605/820355/820924/821134/823706/824761/827435/828053/828481/828606/829536/829918/832750/834210/837276/838456/838501/843834/844074/844423	25
T200	Up	32	GO:0010363	regulation of plant-type hypersensitive response	0.117073	371/20450	4.68101e-13	3.33132e-11	2.95232e-11	816579/817194/818166/818429/818605/820355/820924/821134/823706/824761/827435/828053/828481/828606/829536/829918/832750/834210/837276/838456/838501/843834/844074/844423	24
T200	Up	32	GO:0006612	protein targeting to membrane	0.117073	374/20450	5.56847e-13	3.48778e-11	3.09098e-11	816579/817194/818166/818429/818605/820355/820924/821134/823706/824761/827435/828053/828481/828606/829536/829918/832750/834210/837276/838456/838501/843834/844074/844423	24
T200	Up	32	GO:0012501	programmed cell death	0.126829	448/20450	5.71768e-13	3.48778e-11	3.09098e-11	816579/817194/818166/818429/818605/820355/820924/821134/823706/824608/824761/827435/828053/828481/828606/829536/829918/832750/834210/837276/838456/838501/839808/843834/844074/844423	26
T200	Up	32	GO:0072657	protein localization to membrane	0.117073	377/20450	6.61328e-13	3.52984e-11	3.12826e-11	816579/817194/818166/818429/818605/820355/820924/821134/823706/824761/827435/828053/828481/828606/829536/829918/832750/834210/837276/838456/838501/843834/844074/844423	24
T200	Up	32	GO:0090150	establishment of protein localization to membrane	0.117073	377/20450	6.61328e-13	3.52984e-11	3.12826e-11	816579/817194/818166/818429/818605/820355/820924/821134/823706/824761/827435/828053/828481/828606/829536/829918/832750/834210/837276/838456/838501/843834/844074/844423	24
T200	Up	32	GO:0045088	regulation of innate immune response	0.121951	419/20450	8.95632e-13	3.54546e-11	3.1421e-11	816579/817194/818166/818429/818605/820355/820752/820924/821134/823706/824761/827435/828053/828481/828606/829536/829918/832750/834210/837276/838456/838501/843834/844074/844423	25
T200	Up	32	GO:0050776	regulation of immune response	0.121951	421/20450	9.95132e-13	3.54546e-11	3.1421e-11	816579/817194/818166/818429/818605/820355/820752/820924/821134/823706/824761/827435/828053/828481/828606/829536/829918/832750/834210/837276/838456/838501/843834/844074/844423	25
T200	Up	32	GO:0009692	ethylene metabolic process	0.0731707	119/20450	1.02692e-12	3.54546e-11	3.1421e-11	816913/818319/819184/819828/823815/824944/827435/828559/829591/832285/833727/834244/838314/840410/842428	15
T200	Up	32	GO:0009693	ethylene biosynthetic process	0.0731707	119/20450	1.02692e-12	3.54546e-11	3.1421e-11	816913/818319/819184/819828/823815/824944/827435/828559/829591/832285/833727/834244/838314/840410/842428	15
T200	Up	32	GO:0043449	cellular alkene metabolic process	0.0731707	119/20450	1.02692e-12	3.54546e-11	3.1421e-11	816913/818319/819184/819828/823815/824944/827435/828559/829591/832285/833727/834244/838314/840410/842428	15
T200	Up	32	GO:0043450	alkene biosynthetic process	0.0731707	119/20450	1.02692e-12	3.54546e-11	3.1421e-11	816913/818319/819184/819828/823815/824944/827435/828559/829591/832285/833727/834244/838314/840410/842428	15
T200	Up	32	GO:1900673	olefin metabolic process	0.0731707	119/20450	1.02692e-12	3.54546e-11	3.1421e-11	816913/818319/819184/819828/823815/824944/827435/828559/829591/832285/833727/834244/838314/840410/842428	15
T200	Up	32	GO:1900674	olefin biosynthetic process	0.0731707	119/20450	1.02692e-12	3.54546e-11	3.1421e-11	816913/818319/819184/819828/823815/824944/827435/828559/829591/832285/833727/834244/838314/840410/842428	15
T200	Up	32	GO:0080135	regulation of cellular response to stress	0.117073	385/20450	1.0379e-12	3.54546e-11	3.1421e-11	816579/817194/818166/818429/818605/820355/820924/821134/823706/824761/827435/828053/828481/828606/829536/829918/832750/834210/837276/838456/838501/843834/844074/844423	24
T200	Up	32	GO:0002682	regulation of immune system process	0.121951	424/20450	1.16418e-12	3.69174e-11	3.27174e-11	816579/817194/818166/818429/818605/820355/820752/820924/821134/823706/824761/827435/828053/828481/828606/829536/829918/832750/834210/837276/838456/838501/843834/844074/844423	25
T200	Up	32	GO:0043069	negative regulation of programmed cell death	0.0829268	168/20450	1.16718e-12	3.69174e-11	3.27174e-11	818166/818429/818605/820355/823706/824761/828053/828606/829536/829918/832750/834210/837276/838501/843834/844074/844423	17
T200	Up	32	GO:0060548	negative regulation of cell death	0.0829268	172/20450	1.71557e-12	5.23249e-11	4.6372e-11	818166/818429/818605/820355/823706/824761/828053/828606/829536/829918/832750/834210/837276/838501/843834/844074/844423	17
T200	Up	32	GO:0043067	regulation of programmed cell death	0.117073	396/20450	1.89455e-12	5.57913e-11	4.94441e-11	816579/817194/818166/818429/818605/820355/820924/821134/823706/824761/827435/828053/828481/828606/829536/829918/832750/834210/837276/838456/838501/843834/844074/844423	24
T200	Up	32	GO:0002252	immune effector process	0.097561	279/20450	7.15979e-12	2.03815e-10	1.80628e-10	818166/818319/818429/818605/820355/820752/820924/823815/824608/827435/827463/829591/832285/832530/833727/834770/835193/838981/839666/844423	20
T200	Up	32	GO:0050832	defense response to fungus	0.107317	350/20450	8.22409e-12	2.2656e-10	2.00785e-10	816913/817553/818166/818429/818605/820355/820924/821052/821134/823706/828053/828481/829591/829918/832750/834210/835277/837276/838501/839808/842450/844423	22
T200	Up	32	GO:0009751	response to salicylic acid	0.121951	473/20450	1.26717e-11	3.38175e-10	2.99701e-10	816579/817194/817674/818166/818429/818588/818605/820355/820924/821134/823706/827435/828053/828481/828854/829807/832750/833998/834210/836437/837276/838501/842428/843834/844423	25
T200	Up	32	GO:0009612	response to mechanical stimulus	0.0536585	63/20450	3.06511e-11	7.93214e-10	7.02971e-10	816913/817194/820924/823815/828559/828836/835193/838456/838981/839666/844423	11
T200	Up	32	GO:0009863	salicylic acid mediated signaling pathway	0.102439	353/20450	7.03098e-11	1.76602e-09	1.5651e-09	816579/817194/818166/818429/818605/820355/820924/821134/823706/827435/828053/828481/828854/829807/832750/833998/834210/837276/838501/843834/844423	21
T200	Up	32	GO:0071446	cellular response to salicylic acid stimulus	0.102439	355/20450	7.80712e-11	1.90494e-09	1.68822e-09	816579/817194/818166/818429/818605/820355/820924/821134/823706/827435/828053/828481/828854/829807/832750/833998/834210/837276/838501/843834/844423	21
T200	Up	32	GO:0009867	jasmonic acid mediated signaling pathway	0.0926829	286/20450	9.12408e-11	2.10594e-09	1.86635e-09	816579/817194/818166/818429/820355/820752/820924/821134/823706/827435/828053/828481/832750/834210/837171/837276/838501/843834/844423	19
T200	Up	32	GO:0071395	cellular response to jasmonic acid stimulus	0.0926829	286/20450	9.12408e-11	2.10594e-09	1.86635e-09	816579/817194/818166/818429/820355/820752/820924/821134/823706/827435/828053/828481/832750/834210/837171/837276/838501/843834/844423	19
T200	Up	32	GO:0071236	cellular response to antibiotic	0.102439	364/20450	1.23988e-10	2.78646e-09	2.46945e-09	816579/817194/818166/818429/818605/820355/820924/821134/823706/827435/828053/828481/828854/829807/832750/833998/834210/837276/838501/843834/844423	21
T200	Up	32	GO:0035690	cellular response to drug	0.102439	390/20450	4.38059e-10	9.59238e-09	8.50107e-09	816579/817194/818166/818429/818605/820355/820924/821134/823706/827435/828053/828481/828854/829807/832750/833998/834210/837276/838501/843834/844423	21
T200	Up	32	GO:0071407	cellular response to organic cyclic compound	0.102439	393/20450	5.03398e-10	1.07475e-08	9.52482e-09	816579/817194/818166/818429/818605/820355/820924/821134/823706/827435/828053/828481/828854/829807/832750/833998/834210/837276/838501/843834/844423	21
T200	Up	32	GO:0009738	abscisic acid-activated signaling pathway	0.0829268	248/20450	5.73358e-10	1.19426e-08	1.05839e-08	817553/820355/822462/823706/824761/825481/828053/828606/832285/834210/836843/837276/838501/839666/843834/844423/28719408	17
T200	Up	32	GO:0009862	systemic acquired resistance, salicylic acid mediated signaling pathway	0.0829268	251/20450	6.89868e-10	1.40273e-08	1.24315e-08	816579/818166/818429/820355/820924/821134/823706/828053/828481/828854/829807/832750/833998/834210/837276/838501/844423	17
T200	Up	32	GO:0071215	cellular response to abscisic acid stimulus	0.0829268	263/20450	1.40969e-09	2.73608e-08	2.4248e-08	817553/820355/822462/823706/824761/825481/828053/828606/832285/834210/836843/837276/838501/839666/843834/844423/28719408	17
T200	Up	32	GO:0097306	cellular response to alcohol	0.0829268	263/20450	1.40969e-09	2.73608e-08	2.4248e-08	817553/820355/822462/823706/824761/825481/828053/828606/832285/834210/836843/837276/838501/839666/843834/844423/28719408	17
T200	Up	32	GO:0009723	response to ethylene	0.0926829	353/20450	3.11786e-09	5.917e-08	5.24384e-08	817674/820355/820752/821575/823815/824761/827435/827463/828606/832285/834444/834770/835507/836843/838501/838981/839666/843834/844423	19
T200	Up	32	GO:0009627	systemic acquired resistance	0.102439	446/20450	4.82416e-09	8.95616e-08	7.93724e-08	816579/818166/818429/819184/820355/820924/821134/823706/828053/828481/828854/828957/829807/829918/832750/833998/834210/837276/837998/838501/844423	21
T200	Up	32	GO:0030968	endoplasmic reticulum unfolded protein response	0.0682927	185/20450	5.61971e-09	1.02111e-07	9.04944e-08	818605/820355/822462/828053/828606/829536/829918/834210/834244/837276/837998/838501/844423/28719408	14
T200	Up	32	GO:0006986	response to unfolded protein	0.0682927	187/20450	6.45477e-09	1.10248e-07	9.77049e-08	818605/820355/822462/828053/828606/829536/829918/834210/834244/837276/837998/838501/844423/28719408	14
T200	Up	32	GO:0034620	cellular response to unfolded protein	0.0682927	187/20450	6.45477e-09	1.10248e-07	9.77049e-08	818605/820355/822462/828053/828606/829536/829918/834210/834244/837276/837998/838501/844423/28719408	14
T200	Up	32	GO:0035967	cellular response to topologically incorrect protein	0.0682927	187/20450	6.45477e-09	1.10248e-07	9.77049e-08	818605/820355/822462/828053/828606/829536/829918/834210/834244/837276/837998/838501/844423/28719408	14
T200	Up	32	GO:0000165	MAPK cascade	0.0731707	221/20450	6.99306e-09	1.14848e-07	1.01782e-07	816579/818166/818429/820355/820924/821134/823706/828053/828481/832285/832750/834210/837276/838501/844423	15
T200	Up	32	GO:0023014	signal transduction by protein phosphorylation	0.0731707	221/20450	6.99306e-09	1.14848e-07	1.01782e-07	816579/818166/818429/820355/820924/821134/823706/828053/828481/832285/832750/834210/837276/838501/844423	15
T200	Up	32	GO:2000377	regulation of reactive oxygen species metabolic process	0.0682927	205/20450	2.08733e-08	3.36336e-07	2.98072e-07	816579/818166/818429/820355/820924/821134/823706/828481/828854/829807/832750/833998/842958/844423	14
T200	Up	32	GO:0010310	regulation of hydrogen peroxide metabolic process	0.0634146	186/20450	5.14781e-08	8.14116e-07	7.21496e-07	816579/818166/818429/820355/820924/821134/823706/828481/828854/829807/832750/833998/844423	13
T200	Up	32	GO:0009873	ethylene-activated signaling pathway	0.0536585	125/20450	5.37375e-08	8.34397e-07	7.39469e-07	820752/821575/823815/827435/827463/832285/834444/834770/838981/839666/844423	11
T200	Up	32	GO:0071396	cellular response to lipid	0.0878049	381/20450	6.0823e-08	9.2755e-07	8.22025e-07	817553/820355/822462/823706/824761/824871/825481/828053/828606/832285/834210/836843/837276/838501/839666/843834/844423/28719408	18
T200	Up	32	GO:0009694	jasmonic acid metabolic process	0.0585366	158/20450	6.83075e-08	1.02341e-06	9.06982e-07	820321/823650/827230/830894/835821/838314/838501/839666/843500/843834/844423/28719408	12
T200	Up	32	GO:0009695	jasmonic acid biosynthetic process	0.0536585	135/20450	1.18864e-07	1.75017e-06	1.55106e-06	820321/823650/827230/830894/838314/838501/839666/843500/843834/844423/28719408	11
T200	Up	32	GO:0031348	negative regulation of defense response	0.0731707	277/20450	1.40007e-07	2.02655e-06	1.79599e-06	816579/818166/818429/820355/820924/821134/823706/828053/828481/828957/832750/834210/837276/838501/844423	15
T200	Up	32	GO:0000160	phosphorelay signal transduction system	0.0536585	138/20450	1.48851e-07	2.11864e-06	1.87761e-06	820752/821575/823815/827435/827463/832285/834444/834770/838981/839666/844423	11
T200	Up	32	GO:0051193	regulation of cofactor metabolic process	0.0634146	208/20450	1.90221e-07	2.66309e-06	2.36012e-06	816579/818166/818429/820355/820924/821134/823706/828481/828854/829807/832750/833998/844423	13
T200	Up	32	GO:0071369	cellular response to ethylene stimulus	0.0536585	144/20450	2.2959e-07	3.16242e-06	2.80264e-06	820752/821575/823815/827435/827463/832285/834444/834770/838981/839666/844423	11
T200	Up	32	GO:0009414	response to water deprivation	0.0878049	418/20450	2.419e-07	3.27909e-06	2.90603e-06	818166/818429/818741/820355/820667/821575/823650/823815/824193/825481/828053/828606/832530/836843/837171/838501/839666/843834	18
T200	Up	32	GO:0072593	reactive oxygen species metabolic process	0.0829268	374/20450	2.48438e-07	3.31509e-06	2.93794e-06	816579/818166/818429/818741/820355/820924/821134/823706/828481/828854/829143/829807/831104/832750/833998/842958/844423	17
T200	Up	32	GO:0042743	hydrogen peroxide metabolic process	0.0780488	334/20450	2.81594e-07	3.69971e-06	3.2788e-06	816579/818166/818429/818741/820355/820924/821134/823706/828481/828854/829143/829807/831104/832750/833998/844423	16
T200	Up	32	GO:0009415	response to water	0.0878049	426/20450	3.19479e-07	4.13387e-06	3.66356e-06	818166/818429/818741/820355/820667/821575/823650/823815/824193/825481/828053/828606/832530/836843/837171/838501/839666/843834	18
T200	Up	32	GO:0048585	negative regulation of response to stimulus	0.0780488	367/20450	9.84193e-07	1.25448e-05	1.11176e-05	816579/818166/818429/820355/820752/820924/821134/823706/828053/828481/828957/832750/834210/837276/838501/844423	16
T200	Up	32	GO:0016999	antibiotic metabolic process	0.0878049	470/20450	1.31896e-06	1.65646e-05	1.46801e-05	816579/818166/818429/818741/819184/820355/820924/821134/823706/828481/828854/829143/829807/829918/831104/832750/833998/844423	18
T200	Up	32	GO:0009595	detection of biotic stimulus	0.0390244	104/20450	1.00562e-05	0.000124464	0.000110304	818429/820355/820924/821134/823706/828481/832750/844423	8
T200	Up	32	GO:0046189	phenol-containing compound biosynthetic process	0.0536585	221/20450	1.50135e-05	0.000183164	0.000162326	818429/819184/820355/820924/821134/823706/828481/829918/832750/833520/844423	11
T200	Up	32	GO:0034976	response to endoplasmic reticulum stress	0.0682927	357/20450	1.58168e-05	0.000190247	0.000168603	818605/820355/822462/828053/828606/829536/829918/834210/834244/837276/837998/838501/844423/28719408	14
T200	Up	32	GO:0035966	response to topologically incorrect protein	0.0682927	369/20450	2.28142e-05	0.000270602	0.000239816	818605/820355/822462/828053/828606/829536/829918/834210/834244/837276/837998/838501/844423/28719408	14
T200	Up	32	GO:0018958	phenol-containing compound metabolic process	0.0536585	238/20450	2.98078e-05	0.00034871	0.000309038	818429/819184/820355/820924/821134/823706/828481/829918/832750/833520/844423	11
T200	Up	32	GO:0009646	response to absence of light	0.0243902	37/20450	3.23706e-05	0.000373575	0.000331074	817194/818588/818741/823888/844423	5
T200	Up	32	GO:0017000	antibiotic biosynthetic process	0.0585366	288/20450	3.59474e-05	0.00040932	0.000362753	818429/819184/820355/820924/821134/823706/828481/829143/829918/831104/832750/844423	12
T200	Up	32	GO:0042538	hyperosmotic salinity response	0.0439024	161/20450	3.67975e-05	0.000413488	0.000366446	820355/820667/828606/832530/836843/837171/838501/839666/843834	9
T200	Up	32	GO:0009697	salicylic acid biosynthetic process	0.0487805	209/20450	5.14396e-05	0.000570512	0.000505606	818429/819184/820355/820924/821134/823706/828481/829918/832750/844423	10
T200	Up	32	GO:0009696	salicylic acid metabolic process	0.0487805	222/20450	8.51592e-05	0.000932384	0.000826308	818429/819184/820355/820924/821134/823706/828481/829918/832750/844423	10
T200	Up	32	GO:0051606	detection of stimulus	0.0390244	144/20450	0.000104424	0.00112883	0.00100041	818429/820355/820924/821134/823706/828481/832750/844423	8
T200	Up	32	GO:0043900	regulation of multi-organism process	0.0390244	146/20450	0.000114954	0.00122714	0.00108753	818429/820355/820924/821134/823706/828481/832750/844423	8
T200	Up	32	GO:0006979	response to oxidative stress	0.0731707	485/20450	0.000119093	0.00125562	0.00111277	818588/822462/823706/824193/825481/827463/828053/828481/834244/836437/837252/837253/837998/839666/842198	15
T200	Up	32	GO:0009642	response to light intensity	0.0536585	283/20450	0.000140749	0.00146585	0.00129908	817194/818588/818741/823888/825481/827463/837253/837998/838314/839666/844423	11
T200	Up	32	GO:0042742	defense response to bacterium	0.0634146	398/20450	0.000200445	0.00206241	0.00182777	818166/818429/818588/820355/820752/820924/821134/823706/828481/832285/832750/838501/844423	13
T200	Up	32	GO:0006972	hyperosmotic response	0.0487805	250/20450	0.000224543	0.00228285	0.00202314	818741/820355/820667/828606/832530/836843/837171/838501/839666/843834	10
T200	Up	32	GO:0042537	benzene-containing compound metabolic process	0.0487805	261/20450	0.000316596	0.00318086	0.00281898	818429/819184/820355/820924/821134/823706/828481/829918/832750/844423	10
T200	Up	32	GO:0001666	response to hypoxia	0.0292683	100/20450	0.000514222	0.00510634	0.00452541	819721/823706/828854/829807/832750/833998	6
T200	Up	32	GO:0036293	response to decreased oxygen levels	0.0292683	103/20450	0.000601701	0.00590635	0.0052344	819721/823706/828854/829807/832750/833998	6
T200	Up	32	GO:0070482	response to oxygen levels	0.0292683	104/20450	0.000633289	0.00614578	0.00544659	819721/823706/828854/829807/832750/833998	6
T200	Up	32	GO:0000302	response to reactive oxygen species	0.0487805	318/20450	0.00144271	0.0138435	0.0122686	824193/825481/827463/828053/828481/834244/836437/837253/837998/842198	10
T200	Up	32	GO:0015995	chlorophyll biosynthetic process	0.0292683	125/20450	0.00164653	0.0156238	0.0138463	816579/823650/827230/835507/841029/842198	6
T200	Up	32	GO:0015802	basic amino acid transport	0.0146341	27/20450	0.00243159	0.0228195	0.0202234	820355/829918/844074	3
T200	Up	32	GO:0015696	ammonium transport	0.0146341	31/20450	0.00362852	0.0336821	0.0298502	820355/829918/844074	3
T200	Up	32	GO:0052542	defense response by callose deposition	0.0195122	63/20450	0.00368171	0.0338084	0.0299621	829536/834244/842450/844163	4
T200	Up	32	GO:0006779	porphyrin-containing compound biosynthetic process	0.0292683	151/20450	0.00422197	0.0383571	0.0339933	816579/823650/827230/835507/841029/842198	6
T200	Up	32	GO:0033014	tetrapyrrole biosynthetic process	0.0292683	154/20450	0.00464488	0.041755	0.0370046	816579/823650/827230/835507/841029/842198	6
T200	Up	32	GO:0009816	defense response to bacterium, incompatible interaction	0.0146341	35/20450	0.00513063	0.0447025	0.0396168	818588/828481/832750	3
T200	Up	32	GO:0010120	camalexin biosynthetic process	0.0097561	11/20450	0.00518214	0.0447025	0.0396168	818429/823706	2
T200	Up	32	GO:0051865	protein autoubiquitination	0.0097561	11/20450	0.00518214	0.0447025	0.0396168	818166/823815	2
T200	Up	32	GO:0052317	camalexin metabolic process	0.0097561	11/20450	0.00518214	0.0447025	0.0396168	818429/823706	2
T200	Up	32	GO:0010029	regulation of seed germination	0.0195122	70/20450	0.00536817	0.0458441	0.0406285	819828/825481/827587/842314	4
T200	Down	67	GO:0009812	flavonoid metabolic process	0.0740741	244/20450	6.67184e-08	3.19258e-05	2.86062e-05	818280/824287/824493/826571/827220/828387/828669/830693/831241/834291/837849/841593/842469/842814	14
T200	Down	67	GO:0009718	anthocyanin-containing compound biosynthetic process	0.042328	60/20450	7.78679e-08	3.19258e-05	2.86062e-05	824287/826571/828387/830693/831241/834291/837849/842814	8
T200	Down	67	GO:0009813	flavonoid biosynthetic process	0.0687831	217/20450	1.20901e-07	3.30464e-05	2.96102e-05	818280/824287/824493/826571/827220/828387/830693/831241/834291/837849/841593/842469/842814	13
T200	Down	67	GO:0080167	response to karrikin	0.0529101	128/20450	3.16364e-07	6.48547e-05	5.81112e-05	818280/818596/821206/824493/826983/834906/835256/836562/836826/843806	10
T200	Down	67	GO:0010224	response to UV-B	0.047619	104/20450	5.24756e-07	7.31595e-05	6.55525e-05	818280/824287/826571/827220/830693/831241/831738/834291/842814	9
T200	Down	67	GO:0009411	response to UV	0.0687831	247/20450	5.35314e-07	7.31595e-05	6.55525e-05	818280/820441/824287/826571/827220/827774/830693/831241/831738/834291/839325/841593/842814	13
T200	Down	67	GO:0046283	anthocyanin-containing compound metabolic process	0.042328	85/20450	1.20298e-06	0.000140921	0.000126268	824287/826571/828387/830693/831241/834291/837849/842814	8
T200	Down	67	GO:0019725	cellular homeostasis	0.0687831	316/20450	8.12704e-06	0.000833021	0.000746404	821047/823860/827956/829321/829661/831375/832185/832494/834794/835657/842563/843497/843593	13
T200	Down	67	GO:0009744	response to sucrose	0.0529101	210/20450	2.68585e-05	0.00238819	0.00213986	824287/824578/826571/827220/830693/831241/834291/837543/842814/843806	10
T200	Down	67	GO:0034285	response to disaccharide	0.0529101	212/20450	2.91242e-05	0.00238819	0.00213986	824287/824578/826571/827220/830693/831241/834291/837543/842814/843806	10
T200	Down	67	GO:0046148	pigment biosynthetic process	0.0582011	267/20450	4.04139e-05	0.00301267	0.00269942	820500/824287/826571/828387/830052/830693/831241/834291/837515/837849/842814	11
T200	Down	67	GO:0009699	phenylpropanoid biosynthetic process	0.042328	139/20450	4.60573e-05	0.00314725	0.00282	818280/824493/826571/828387/828469/831241/841593/842563	8
T200	Down	67	GO:0009698	phenylpropanoid metabolic process	0.047619	183/20450	5.31095e-05	0.00330044	0.00295726	818280/824493/826571/828387/828469/831241/841593/842563/842814	9
T200	Down	67	GO:0048638	regulation of developmental growth	0.0582011	277/20450	5.63489e-05	0.00330044	0.00295726	815130/815145/818649/818884/827774/828024/829595/831001/835526/838405/838677	11
T200	Down	67	GO:0006873	cellular ion homeostasis	0.0582011	290/20450	8.49119e-05	0.00464185	0.00415919	821047/823860/827956/829321/832185/832494/834794/835657/842563/843497/843593	11
T200	Down	67	GO:0055082	cellular chemical homeostasis	0.0582011	299/20450	0.000111272	0.00570267	0.00510971	821047/823860/827956/829321/832185/832494/834794/835657/842563/843497/843593	11
T200	Down	67	GO:0040008	regulation of growth	0.0582011	306/20450	0.000136334	0.00644755	0.00577714	815130/815145/818649/818884/827774/828024/829595/831001/835526/838405/838677	11
T200	Down	67	GO:0009664	plant-type cell wall organization	0.0634921	361/20450	0.000141532	0.00644755	0.00577714	814838/815145/817830/818161/818476/822543/829595/832832/834797/843288/843408/843948	12
T200	Down	67	GO:0010075	regulation of meristem growth	0.042328	171/20450	0.000195586	0.00844108	0.00756338	815130/815145/818649/818884/827774/828024/838405/838677	8
T200	Down	67	GO:0035266	meristem growth	0.042328	179/20450	0.000266886	0.0109423	0.00980455	815130/815145/818649/818884/827774/828024/838405/838677	8
T200	Down	67	GO:0030003	cellular cation homeostasis	0.0529101	281/20450	0.000297577	0.0116197	0.0104115	823860/827956/829321/832185/832494/834794/835657/842563/843497/843593	10
T200	Down	67	GO:0050801	ion homeostasis	0.0582011	342/20450	0.000354795	0.0131828	0.0118121	821047/823860/827956/829321/832185/832494/834794/835657/842563/843497/843593	11
T200	Down	67	GO:0009743	response to carbohydrate	0.0634921	401/20450	0.000369761	0.0131828	0.0118121	824287/824578/825316/826571/827220/830693/831241/834291/837543/841665/842814/843806	12
T200	Down	67	GO:0042440	pigment metabolic process	0.0582011	346/20450	0.00039133	0.0133083	0.0119245	820500/824287/826571/828387/830052/830693/831241/834291/837515/837849/842814	11
T200	Down	67	GO:0006598	polyamine catabolic process	0.021164	38/20450	0.000408016	0.0133083	0.0119245	818280/824493/841593/842563	4
T200	Down	67	GO:0042592	homeostatic process	0.0687831	467/20450	0.00042197	0.0133083	0.0119245	821047/823860/827956/829321/829661/831375/832185/832494/834794/835657/842563/843497/843593	13
T200	Down	67	GO:0071669	plant-type cell wall organization or biogenesis	0.0687831	479/20450	0.000535427	0.0162611	0.0145703	814838/815145/817830/818161/818476/822543/829595/832832/834797/839325/843288/843408/843948	13
T200	Down	67	GO:0070838	divalent metal ion transport	0.042328	209/20450	0.000746581	0.0203531	0.0182368	819281/823860/825316/827055/832185/835657/842563/843593	8
T200	Down	67	GO:0009310	amine catabolic process	0.031746	117/20450	0.000770318	0.0203531	0.0182368	818280/820651/821965/824493/841593/842563	6
T200	Down	67	GO:0042402	cellular biogenic amine catabolic process	0.031746	117/20450	0.000770318	0.0203531	0.0182368	818280/820651/821965/824493/841593/842563	6
T200	Down	67	GO:0055080	cation homeostasis	0.0529101	318/20450	0.000779835	0.0203531	0.0182368	823860/827956/829321/832185/832494/834794/835657/842563/843497/843593	10
T200	Down	67	GO:0072511	divalent inorganic cation transport	0.042328	211/20450	0.000794268	0.0203531	0.0182368	819281/823860/825316/827055/832185/835657/842563/843593	8
T200	Down	67	GO:0044106	cellular amine metabolic process	0.037037	167/20450	0.000941518	0.0226074	0.0202567	818280/820651/821965/824493/841593/842563/843236	7
T200	Down	67	GO:0009962	regulation of flavonoid biosynthetic process	0.031746	122/20450	0.000958513	0.0226074	0.0202567	818280/824493/826571/831241/841593/842469	6
T200	Down	67	GO:0048878	chemical homeostasis	0.0582011	386/20450	0.000964952	0.0226074	0.0202567	821047/823860/827956/829321/832185/832494/834794/835657/842563/843497/843593	11
T200	Down	67	GO:0010374	stomatal complex development	0.042328	222/20450	0.00110223	0.0251064	0.0224959	819082/819584/823977/824087/831001/832185/840324/843593	8
T200	Down	67	GO:0048509	regulation of meristem development	0.042328	224/20450	0.00116729	0.0258697	0.0231797	815130/815145/818649/818884/827774/828024/838405/838677	8
T200	Down	67	GO:0009308	amine metabolic process	0.042328	229/20450	0.0013434	0.0289892	0.0259749	817635/818280/820651/821965/824493/841593/842563/843236	8
T200	Down	67	GO:0010073	meristem maintenance	0.047619	285/20450	0.00137925	0.0289996	0.0259842	815130/815145/818649/818884/827774/828024/834451/838405/838677	9
T200	Down	67	GO:0010119	regulation of stomatal movement	0.021164	53/20450	0.00145327	0.0297921	0.0266944	835657/841537/843288/843321	4
T200	Down	67	GO:0006595	polyamine metabolic process	0.021164	54/20450	0.00155833	0.0304245	0.027261	818280/824493/841593/842563	4
T200	Down	67	GO:0009805	coumarin biosynthetic process	0.021164	54/20450	0.00155833	0.0304245	0.027261	818280/824493/841593/842563	4
T200	Down	67	GO:0009804	coumarin metabolic process	0.021164	55/20450	0.00166855	0.0311265	0.02789	818280/824493/841593/842563	4
T200	Down	67	GO:0042737	drug catabolic process	0.031746	137/20450	0.00173958	0.0311265	0.02789	818280/820651/824415/829661/830052/832233	6
T200	Down	67	GO:0010393	galacturonan metabolic process	0.021164	56/20450	0.00178408	0.0311265	0.02789	817830/817922/818161/843948	4
T200	Down	67	GO:0042398	cellular modified amino acid biosynthetic process	0.021164	56/20450	0.00178408	0.0311265	0.02789	818280/824493/841593/842563	4
T200	Down	67	GO:0045488	pectin metabolic process	0.021164	56/20450	0.00178408	0.0311265	0.02789	817830/817922/818161/843948	4
T200	Down	67	GO:0010118	stomatal movement	0.026455	97/20450	0.0020742	0.0354343	0.0317499	832494/835657/841537/843288/843321	5
T200	Down	67	GO:0042547	cell wall modification involved in multidimensional cell growth	0.015873	28/20450	0.00214704	0.0359301	0.0321941	814838/822543/843408	3
T200	Down	67	GO:0098771	inorganic ion homeostasis	0.042328	248/20450	0.00221414	0.0363118	0.0325361	821047/827956/829321/832494/834794/835657/842563/843497	8
T200	Down	67	GO:0006875	cellular metal ion homeostasis	0.037037	195/20450	0.00228898	0.0368031	0.0329764	827956/829321/832494/834794/835657/842563/843497	7
T200	Down	67	GO:0044036	cell wall macromolecule metabolic process	0.047619	309/20450	0.00238995	0.0376877	0.0337689	814838/816201/818161/824456/825375/828080/834794/838790/843948	9
T200	Down	67	GO:0010103	stomatal complex morphogenesis	0.031746	149/20450	0.0026533	0.041051	0.0367826	819584/823977/824087/832185/840324/843593	6
T200	Down	67	GO:0044550	secondary metabolite biosynthetic process	0.047619	316/20450	0.00277531	0.0421436	0.0377615	818280/821206/824493/826571/828387/828469/831241/841593/842563	9
T200	Down	67	GO:0042545	cell wall modification	0.047619	325/20450	0.00334136	0.0498166	0.0446367	814838/817830/818476/822543/829595/832832/834797/843288/843408	9
T200	Up	67	GO:0010200	response to chitin	0.219512	421/20450	9.16211e-27	6.82577e-24	5.56478e-24	816909/816913/817778/818319/818429/818588/818605/820355/820752/820924/823706/823815/824807/825319/825399/827435/827463/827622/828481/828516/828559/828836/829591/829880/829918/832285/832750/834770/835193/836242/836655/838456/839666/842745/843500/844163	36
T200	Up	67	GO:0010243	response to organonitrogen compound	0.219512	443/20450	5.40825e-26	2.01457e-23	1.6424e-23	816909/816913/817778/818319/818429/818588/818605/820355/820752/820924/823706/823815/824807/825319/825399/827435/827463/827622/828481/828516/828559/828836/829591/829880/829918/832285/832750/834770/835193/836242/836655/838456/839666/842745/843500/844163	36
T200	Up	67	GO:0035556	intracellular signal transduction	0.176829	495/20450	4.07075e-17	1.0109e-14	8.24148e-15	815147/818319/818429/818605/820355/820429/820752/820924/823706/823815/824807/827435/827463/827622/828053/828481/829591/832285/832750/834210/834444/834770/835193/836211/836242/836655/837276/839666/839748	29
T200	Up	67	GO:0002679	respiratory burst involved in defense response	0.103659	121/20450	1.08784e-16	1.62088e-14	1.32144e-14	818319/818429/818605/820355/820752/820924/823815/824807/827435/827463/827622/829591/832285/834770/835193/836242/839666	17
T200	Up	67	GO:0045730	respiratory burst	0.103659	121/20450	1.08784e-16	1.62088e-14	1.32144e-14	818319/818429/818605/820355/820752/820924/823815/824807/827435/827463/827622/829591/832285/834770/835193/836242/839666	17
T200	Up	67	GO:0045088	regulation of innate immune response	0.152439	419/20450	4.88468e-15	5.79893e-13	4.72764e-13	815147/818429/818605/819244/820355/820752/820924/823706/824807/827435/828053/828481/829466/829623/829918/830934/832750/833550/834210/836211/836242/837276/838456/839748/844074	25
T200	Up	67	GO:0050776	regulation of immune response	0.152439	421/20450	5.44866e-15	5.79893e-13	4.72764e-13	815147/818429/818605/819244/820355/820752/820924/823706/824807/827435/828053/828481/829466/829623/829918/830934/832750/833550/834210/836211/836242/837276/838456/839748/844074	25
T200	Up	67	GO:0002682	regulation of immune system process	0.152439	424/20450	6.41185e-15	5.97104e-13	4.86795e-13	815147/818429/818605/819244/820355/820752/820924/823706/824807/827435/828053/828481/829466/829623/829918/830934/832750/833550/834210/836211/836242/837276/838456/839748/844074	25
T200	Up	67	GO:0009626	plant-type hypersensitive response	0.146341	400/20450	1.59468e-14	1.25524e-12	1.02334e-12	815147/818429/818605/820355/820924/823706/824807/827435/828053/828481/829466/829623/829918/830934/832750/833550/834210/836211/836242/837276/838456/839748/839808/844074	24
T200	Up	67	GO:0034050	host programmed cell death induced by symbiont	0.146341	401/20450	1.68488e-14	1.25524e-12	1.02334e-12	815147/818429/818605/820355/820924/823706/824807/827435/828053/828481/829466/829623/829918/830934/832750/833550/834210/836211/836242/837276/838456/839748/839808/844074	24
T200	Up	67	GO:0010941	regulation of cell death	0.146341	404/20450	1.98541e-14	1.34466e-12	1.09625e-12	815147/817746/818429/818605/820355/820924/823706/824807/827435/828053/828481/829466/829623/829918/830934/832750/833550/834210/836211/836242/837276/838456/839748/844074	24
T200	Up	67	GO:0008219	cell death	0.158537	496/20450	2.81046e-14	1.68946e-12	1.37735e-12	814657/815147/817746/818429/818605/820355/820924/823706/824807/827435/828053/828481/829466/829623/829918/830934/832750/833550/834210/836211/836242/837276/838456/839748/839808/844074	26
T200	Up	67	GO:0010363	regulation of plant-type hypersensitive response	0.140244	371/20450	2.94806e-14	1.68946e-12	1.37735e-12	815147/818429/818605/820355/820924/823706/824807/827435/828053/828481/829466/829623/829918/830934/832750/833550/834210/836211/836242/837276/838456/839748/844074	23
T200	Up	67	GO:0009611	response to wounding	0.134146	335/20450	3.45448e-14	1.73689e-12	1.41602e-12	815147/816913/819244/820355/820429/820924/821214/822051/823706/823815/828053/828540/828559/828836/829567/829623/835193/836242/838456/839666/839748/843500	22
T200	Up	67	GO:0006612	protein targeting to membrane	0.140244	374/20450	3.49709e-14	1.73689e-12	1.41602e-12	815147/818429/818605/820355/820924/823706/824807/827435/828053/828481/829466/829623/829918/830934/832750/833550/834210/836211/836242/837276/838456/839748/844074	23
T200	Up	67	GO:0072657	protein localization to membrane	0.140244	377/20450	4.14185e-14	1.81511e-12	1.47978e-12	815147/818429/818605/820355/820924/823706/824807/827435/828053/828481/829466/829623/829918/830934/832750/833550/834210/836211/836242/837276/838456/839748/844074	23
T200	Up	67	GO:0090150	establishment of protein localization to membrane	0.140244	377/20450	4.14185e-14	1.81511e-12	1.47978e-12	815147/818429/818605/820355/820924/823706/824807/827435/828053/828481/829466/829623/829918/830934/832750/833550/834210/836211/836242/837276/838456/839748/844074	23
T200	Up	67	GO:0080135	regulation of cellular response to stress	0.140244	385/20450	6.45508e-14	2.67169e-12	2.17812e-12	815147/818429/818605/820355/820924/823706/824807/827435/828053/828481/829466/829623/829918/830934/832750/833550/834210/836211/836242/837276/838456/839748/844074	23
T200	Up	67	GO:0043067	regulation of programmed cell death	0.140244	396/20450	1.16797e-13	4.57967e-12	3.73362e-12	815147/818429/818605/820355/820924/823706/824807/827435/828053/828481/829466/829623/829918/830934/832750/833550/834210/836211/836242/837276/838456/839748/844074	23
T200	Up	67	GO:0012501	programmed cell death	0.146341	448/20450	1.89528e-13	7.05992e-12	5.75567e-12	815147/818429/818605/820355/820924/823706/824807/827435/828053/828481/829466/829623/829918/830934/832750/833550/834210/836211/836242/837276/838456/839748/839808/844074	24
T200	Up	67	GO:0009692	ethylene metabolic process	0.0853659	119/20450	7.41787e-13	2.1255e-11	1.73284e-11	816913/818319/819828/823815/824944/827388/827435/828540/828559/829591/832285/834244/836655/839748	14
T200	Up	67	GO:0009693	ethylene biosynthetic process	0.0853659	119/20450	7.41787e-13	2.1255e-11	1.73284e-11	816913/818319/819828/823815/824944/827388/827435/828540/828559/829591/832285/834244/836655/839748	14
T200	Up	67	GO:0043449	cellular alkene metabolic process	0.0853659	119/20450	7.41787e-13	2.1255e-11	1.73284e-11	816913/818319/819828/823815/824944/827388/827435/828540/828559/829591/832285/834244/836655/839748	14
T200	Up	67	GO:0043450	alkene biosynthetic process	0.0853659	119/20450	7.41787e-13	2.1255e-11	1.73284e-11	816913/818319/819828/823815/824944/827388/827435/828540/828559/829591/832285/834244/836655/839748	14
T200	Up	67	GO:1900673	olefin metabolic process	0.0853659	119/20450	7.41787e-13	2.1255e-11	1.73284e-11	816913/818319/819828/823815/824944/827388/827435/828540/828559/829591/832285/834244/836655/839748	14
T200	Up	67	GO:1900674	olefin biosynthetic process	0.0853659	119/20450	7.41787e-13	2.1255e-11	1.73284e-11	816913/818319/819828/823815/824944/827388/827435/828540/828559/829591/832285/834244/836655/839748	14
T200	Up	67	GO:0002252	immune effector process	0.115854	279/20450	1.13239e-12	3.12455e-11	2.54732e-11	818319/818429/818605/819244/820355/820752/820924/823815/824807/827435/827463/827622/829591/832285/832530/834770/835193/836242/839666	19
T200	Up	67	GO:0009751	response to salicylic acid	0.140244	473/20450	4.61286e-12	1.22735e-10	1.00061e-10	815147/818429/818588/818605/820355/820924/823706/824807/827435/828053/828481/829623/829807/829880/832750/833550/833998/834210/836211/836242/836437/837276/839748	23
T200	Up	67	GO:0035690	cellular response to drug	0.128049	390/20450	6.2522e-12	1.58504e-10	1.29222e-10	815147/816909/818429/818605/820355/820924/823706/824807/827435/828053/828481/829623/829807/832750/833550/833998/834210/836211/836242/837276/839748	21
T200	Up	67	GO:0043069	negative regulation of programmed cell death	0.0914634	168/20450	6.38272e-12	1.58504e-10	1.29222e-10	815147/818429/818605/820355/823706/824807/828053/829918/830934/832750/834210/836242/837276/839748/844074	15
T200	Up	67	GO:0050832	defense response to fungus	0.121951	350/20450	7.03909e-12	1.69165e-10	1.37914e-10	815147/816913/818289/818429/818605/820355/820429/820924/823706/824807/828053/828481/829591/829918/832750/834210/836242/837276/839748/839808	20
T200	Up	67	GO:0009863	salicylic acid mediated signaling pathway	0.121951	353/20450	8.21994e-12	1.9137e-10	1.56017e-10	815147/818429/818605/820355/820924/823706/824807/827435/828053/828481/829623/829807/832750/833550/833998/834210/836211/836242/837276/839748	20
T200	Up	67	GO:0060548	negative regulation of cell death	0.0914634	172/20450	8.97515e-12	1.99562e-10	1.62695e-10	815147/818429/818605/820355/823706/824807/828053/829918/830934/832750/834210/836242/837276/839748/844074	15
T200	Up	67	GO:0071446	cellular response to salicylic acid stimulus	0.121951	355/20450	9.10753e-12	1.99562e-10	1.62695e-10	815147/818429/818605/820355/820924/823706/824807/827435/828053/828481/829623/829807/832750/833550/833998/834210/836211/836242/837276/839748	20
T200	Up	67	GO:0071236	cellular response to antibiotic	0.121951	364/20450	1.43295e-11	3.05015e-10	2.48666e-10	815147/818429/818605/820355/820924/823706/824807/827435/828053/828481/829623/829807/832750/833550/833998/834210/836211/836242/837276/839748	20
T200	Up	67	GO:0009867	jasmonic acid mediated signaling pathway	0.109756	286/20450	1.71871e-11	3.46064e-10	2.82132e-10	815147/818429/819244/820355/820752/820924/823706/824807/827435/828053/828481/829623/832750/834210/836211/836242/837276/839748	18
T200	Up	67	GO:0071395	cellular response to jasmonic acid stimulus	0.109756	286/20450	1.71871e-11	3.46064e-10	2.82132e-10	815147/818429/819244/820355/820752/820924/823706/824807/827435/828053/828481/829623/832750/834210/836211/836242/837276/839748	18
T200	Up	67	GO:0009862	systemic acquired resistance, salicylic acid mediated signaling pathway	0.103659	251/20450	2.03481e-11	3.98929e-10	3.25231e-10	815147/818429/820355/820924/823706/824807/828053/828481/829807/832750/833550/833998/834210/836211/836242/837276/839748	17
T200	Up	67	GO:0009753	response to jasmonic acid	0.134146	474/20450	3.45049e-11	6.59132e-10	5.37363e-10	815147/818429/819244/820355/820752/820924/823706/824807/827435/828053/828481/828540/829623/829880/832750/834210/836211/836242/837276/839666/839748/843500	22
T200	Up	67	GO:0071407	cellular response to organic cyclic compound	0.121951	393/20450	5.67088e-11	1.0562e-09	8.61079e-10	815147/818429/818605/820355/820924/823706/824807/827435/828053/828481/829623/829807/832750/833550/833998/834210/836211/836242/837276/839748	20
T200	Up	67	GO:0031348	negative regulation of defense response	0.103659	277/20450	9.59086e-11	1.74273e-09	1.42078e-09	815147/818429/819244/820355/820924/823706/824807/828053/828481/829466/832750/833550/834210/836211/836242/837276/839748	17
T200	Up	67	GO:0000165	MAPK cascade	0.0914634	221/20450	3.17309e-10	5.49756e-09	4.48194e-09	815147/818429/820355/820924/823706/824807/828053/828481/832285/832750/834210/836211/836242/837276/839748	15
T200	Up	67	GO:0023014	signal transduction by protein phosphorylation	0.0914634	221/20450	3.17309e-10	5.49756e-09	4.48194e-09	815147/818429/820355/820924/823706/824807/828053/828481/832285/832750/834210/836211/836242/837276/839748	15
T200	Up	67	GO:0048585	negative regulation of response to stimulus	0.109756	367/20450	9.93116e-10	1.68153e-08	1.37088e-08	815147/818429/819244/820355/820752/820924/823706/824807/828053/828481/829466/832750/833550/834210/836211/836242/837276/839748	18
T200	Up	67	GO:2000377	regulation of reactive oxygen species metabolic process	0.0853659	205/20450	1.17006e-09	1.93709e-08	1.57924e-08	818429/819244/820355/820924/823706/824807/828481/829807/832750/833998/836211/836242/839748/842958	14
T200	Up	67	GO:0009612	response to mechanical stimulus	0.054878	63/20450	1.79791e-09	2.91183e-08	2.3739e-08	816913/820924/823815/828559/828836/835193/836242/838456/839666	9
T200	Up	67	GO:0009627	systemic acquired resistance	0.115854	446/20450	3.41183e-09	5.40812e-08	4.40902e-08	815147/818429/819244/820355/820924/823706/824807/828053/828481/829807/829918/832750/833550/833998/834210/836211/836242/837276/839748	19
T200	Up	67	GO:0009723	response to ethylene	0.097561	353/20450	2.69219e-08	4.1785e-07	3.40656e-07	820355/820429/820752/823815/827435/827463/829623/829880/832285/834444/834770/835507/836655/839666/839748/842193	16
T200	Up	67	GO:0010310	regulation of hydrogen peroxide metabolic process	0.0731707	186/20450	3.53177e-08	5.36973e-07	4.37772e-07	818429/820355/820924/823706/824807/828481/829807/832750/833998/836211/836242/839748	12
T200	Up	67	GO:0051193	regulation of cofactor metabolic process	0.0731707	208/20450	1.2071e-07	1.79857e-06	1.4663e-06	818429/820355/820924/823706/824807/828481/829807/832750/833998/836211/836242/839748	12
T200	Up	67	GO:0030968	endoplasmic reticulum unfolded protein response	0.0670732	185/20450	3.04813e-07	4.45266e-06	3.63008e-06	815147/818605/820355/828053/829918/830934/834210/834244/836242/837276/839748	11
T200	Up	67	GO:0006986	response to unfolded protein	0.0670732	187/20450	3.3952e-07	4.68412e-06	3.81877e-06	815147/818605/820355/828053/829918/830934/834210/834244/836242/837276/839748	11
T200	Up	67	GO:0034620	cellular response to unfolded protein	0.0670732	187/20450	3.3952e-07	4.68412e-06	3.81877e-06	815147/818605/820355/828053/829918/830934/834210/834244/836242/837276/839748	11
T200	Up	67	GO:0035967	cellular response to topologically incorrect protein	0.0670732	187/20450	3.3952e-07	4.68412e-06	3.81877e-06	815147/818605/820355/828053/829918/830934/834210/834244/836242/837276/839748	11
T200	Up	67	GO:0072593	reactive oxygen species metabolic process	0.0914634	374/20450	3.61728e-07	4.89977e-06	3.99459e-06	818429/818741/819244/820355/820924/823706/824807/828481/829807/832750/833998/836211/836242/839748/842958	15
T200	Up	67	GO:0009873	ethylene-activated signaling pathway	0.054878	125/20450	7.60481e-07	1.01171e-05	8.24807e-06	820429/820752/823815/827435/827463/832285/834444/834770/839666	9
T200	Up	67	GO:0042742	defense response to bacterium	0.0914634	398/20450	7.92912e-07	1.02444e-05	8.35185e-06	815147/818429/818588/819244/820355/820752/820924/823706/824807/828481/829466/832285/832750/836242/839748	15
T200	Up	67	GO:0009738	abscisic acid-activated signaling pathway	0.0731707	248/20450	7.97551e-07	1.02444e-05	8.35185e-06	815147/819280/820355/823706/828053/829623/832285/834210/836655/837276/839666/839748	12
T200	Up	67	GO:0071215	cellular response to abscisic acid stimulus	0.0731707	263/20450	1.47823e-06	1.83547e-05	1.49639e-05	815147/819280/820355/823706/828053/829623/832285/834210/836655/837276/839666/839748	12
T200	Up	67	GO:0097306	cellular response to alcohol	0.0731707	263/20450	1.47823e-06	1.83547e-05	1.49639e-05	815147/819280/820355/823706/828053/829623/832285/834210/836655/837276/839666/839748	12
T200	Up	67	GO:0000160	phosphorelay signal transduction system	0.054878	138/20450	1.74425e-06	2.13027e-05	1.73673e-05	820429/820752/823815/827435/827463/832285/834444/834770/839666	9
T200	Up	67	GO:0009595	detection of biotic stimulus	0.0487805	104/20450	1.93298e-06	2.32269e-05	1.8936e-05	818429/820355/820924/823706/824807/828481/832750/836242	8
T200	Up	67	GO:0051606	detection of stimulus	0.054878	144/20450	2.48375e-06	2.89124e-05	2.35711e-05	818429/819244/820355/820924/823706/824807/828481/832750/836242	9
T200	Up	67	GO:0071369	cellular response to ethylene stimulus	0.054878	144/20450	2.48375e-06	2.89124e-05	2.35711e-05	820429/820752/823815/827435/827463/832285/834444/834770/839666	9
T200	Up	67	GO:0042743	hydrogen peroxide metabolic process	0.0792683	334/20450	3.12316e-06	3.57963e-05	2.91832e-05	818429/818741/820355/820924/823706/824807/828481/829807/832750/833998/836211/836242/839748	13
T200	Up	67	GO:0016999	antibiotic metabolic process	0.0914634	470/20450	6.09129e-06	6.87577e-05	5.60554e-05	815147/818429/818741/820355/820924/823706/824807/828481/829807/829918/832750/833998/836211/836242/839748	15
T200	Up	67	GO:0009697	salicylic acid biosynthetic process	0.0609756	209/20450	7.49373e-06	8.33258e-05	6.79322e-05	815147/818429/820355/820924/823706/824807/828481/829918/832750/836242	10
T200	Up	67	GO:0046189	phenol-containing compound biosynthetic process	0.0609756	221/20450	1.22101e-05	0.000133772	0.000109059	815147/818429/820355/820924/823706/824807/828481/829918/832750/836242	10
T200	Up	67	GO:0009696	salicylic acid metabolic process	0.0609756	222/20450	1.26988e-05	0.000137111	0.000111781	815147/818429/820355/820924/823706/824807/828481/829918/832750/836242	10
T200	Up	67	GO:0006862	nucleotide transport	0.0304878	39/20450	1.44114e-05	0.000153378	0.000125043	819693/820355/829918/836242/844074	5
T200	Up	67	GO:0018958	phenol-containing compound metabolic process	0.0609756	238/20450	2.31499e-05	0.000242911	0.000198035	815147/818429/820355/820924/823706/824807/828481/829918/832750/836242	10
T200	Up	67	GO:0043900	regulation of multi-organism process	0.0487805	146/20450	2.37912e-05	0.000246173	0.000200695	818429/820355/820924/823706/824807/828481/832750/836242	8
T200	Up	67	GO:0009625	response to insect	0.0304878	45/20450	2.94172e-05	0.000300217	0.000244755	815147/820355/824807/833550/836242	5
T200	Up	67	GO:0035966	response to topologically incorrect protein	0.0731707	369/20450	4.46547e-05	0.000449564	0.000366511	815147/818605/819693/820355/828053/829918/830934/834210/834244/836242/837276/839748	12
T200	Up	67	GO:0042538	hyperosmotic salinity response	0.0487805	161/20450	4.78855e-05	0.000475663	0.000387789	815147/818694/819280/820355/829623/832530/839666/839748	8
T200	Up	67	GO:0042537	benzene-containing compound metabolic process	0.0609756	261/20450	5.06185e-05	0.000496195	0.000404528	815147/818429/820355/820924/823706/824807/828481/829918/832750/836242	10
T200	Up	67	GO:0015748	organophosphate ester transport	0.0304878	51/20450	5.44097e-05	0.000526431	0.000429178	819693/820355/829918/836242/844074	5
T200	Up	67	GO:0015802	basic amino acid transport	0.0243902	27/20450	6.05939e-05	0.000572579	0.000466801	820355/829918/836242/844074	4
T200	Up	67	GO:0071396	cellular response to lipid	0.0731707	381/20450	6.07165e-05	0.000572579	0.000466801	815147/819280/820355/823706/828053/829623/832285/834210/836655/837276/839666/839748	12
T200	Up	67	GO:0010120	camalexin biosynthetic process	0.0182927	11/20450	7.97006e-05	0.000733048	0.000597625	818429/823706/824807	3
T200	Up	67	GO:0052317	camalexin metabolic process	0.0182927	11/20450	7.97006e-05	0.000733048	0.000597625	818429/823706/824807	3
T200	Up	67	GO:0009403	toxin biosynthetic process	0.0182927	12/20450	0.000105642	0.000907335	0.000739714	818429/823706/824807	3
T200	Up	67	GO:0009700	indole phytoalexin biosynthetic process	0.0182927	12/20450	0.000105642	0.000907335	0.000739714	818429/823706/824807	3
T200	Up	67	GO:0046217	indole phytoalexin metabolic process	0.0182927	12/20450	0.000105642	0.000907335	0.000739714	818429/823706/824807	3
T200	Up	67	GO:0052314	phytoalexin metabolic process	0.0182927	12/20450	0.000105642	0.000907335	0.000739714	818429/823706/824807	3
T200	Up	67	GO:0052315	phytoalexin biosynthetic process	0.0182927	12/20450	0.000105642	0.000907335	0.000739714	818429/823706/824807	3
T200	Up	67	GO:0015696	ammonium transport	0.0243902	31/20450	0.000105957	0.000907335	0.000739714	820355/829918/836242/844074	4
T200	Up	67	GO:0017000	antibiotic biosynthetic process	0.0609756	288/20450	0.000114526	0.000969563	0.000790446	815147/818429/820355/820924/823706/824807/828481/829918/832750/836242	10
T200	Up	67	GO:0034976	response to endoplasmic reticulum stress	0.0670732	357/20450	0.000149861	0.00125445	0.0010227	815147/818605/820355/828053/829918/830934/834210/834244/836242/837276/839748	11
T200	Up	67	GO:0006979	response to oxidative stress	0.0792683	485/20450	0.000151677	0.00125555	0.0010236	818588/819244/823706/827463/828053/828481/829623/834244/836437/837252/837253/839666/842198	13
T200	Up	67	GO:0001666	response to hypoxia	0.0365854	100/20450	0.00015535	0.00127182	0.00103686	819721/823706/824807/829807/832750/833998	6
T200	Up	67	GO:0036293	response to decreased oxygen levels	0.0365854	103/20450	0.000182697	0.00147944	0.00120613	819721/823706/824807/829807/832750/833998	6
T200	Up	67	GO:0070482	response to oxygen levels	0.0365854	104/20450	0.000192611	0.0015297	0.0012471	819721/823706/824807/829807/832750/833998	6
T200	Up	67	GO:0006972	hyperosmotic response	0.054878	250/20450	0.000193009	0.0015297	0.0012471	815147/818694/818741/819280/820355/829623/832530/839666/839748	9
T200	Up	67	GO:0009694	jasmonic acid metabolic process	0.0426829	158/20450	0.000290397	0.00227732	0.00185661	819244/828540/829623/836242/839666/839748/843500	7
T200	Up	67	GO:0009414	response to water deprivation	0.0670732	418/20450	0.000572565	0.00444334	0.00362248	815147/818429/818741/819280/820355/823815/828053/829623/832530/839666/839748	11
T200	Up	67	GO:0031349	positive regulation of defense response	0.0243902	49/20450	0.000637811	0.00489865	0.00399367	817746/819244/820752/824807	4
T200	Up	67	GO:0009415	response to water	0.0670732	426/20450	0.000669449	0.00508918	0.004149	815147/818429/818741/819280/820355/823815/828053/829623/832530/839666/839748	11
T200	Up	67	GO:0009682	induced systemic resistance	0.0182927	22/20450	0.000697165	0.00524634	0.00427713	819244/820752/824807	3
T200	Up	67	GO:0015711	organic anion transport	0.054878	302/20450	0.000762229	0.00567861	0.00462954	819693/820355/822740/824944/828540/829918/836242/842745/844074	9
T200	Up	67	GO:0009695	jasmonic acid biosynthetic process	0.0365854	135/20450	0.000777941	0.00573828	0.00467819	828540/829623/836242/839666/839748/843500	6
T200	Up	67	GO:0006865	amino acid transport	0.0487805	255/20450	0.00107548	0.00785519	0.00640402	820355/822740/824944/828540/829918/836242/842745/844074	8
T200	Up	67	GO:0048584	positive regulation of response to stimulus	0.0304878	101/20450	0.0013302	0.00962133	0.00784388	817746/819244/820752/823706/824807	5
T200	Up	67	GO:0009963	positive regulation of flavonoid biosynthetic process	0.0304878	103/20450	0.00145143	0.0103972	0.00847644	815147/820355/829466/833550/838456	5
T200	Up	67	GO:0015849	organic acid transport	0.0487805	280/20450	0.00194126	0.0136438	0.0111232	820355/822740/824944/828540/829918/836242/842745/844074	8
T200	Up	67	GO:0046942	carboxylic acid transport	0.0487805	280/20450	0.00194126	0.0136438	0.0111232	820355/822740/824944/828540/829918/836242/842745/844074	8
T200	Up	67	GO:0002218	activation of innate immune response	0.0182927	34/20450	0.00252473	0.017416	0.0141985	819244/820752/824807	3
T200	Up	67	GO:0002253	activation of immune response	0.0182927	34/20450	0.00252473	0.017416	0.0141985	819244/820752/824807	3
T200	Up	67	GO:0009816	defense response to bacterium, incompatible interaction	0.0182927	35/20450	0.0027453	0.0187637	0.0152973	818588/828481/832750	3
T200	Up	67	GO:0043090	amino acid import	0.0243902	74/20450	0.00296667	0.0199834	0.0162917	820355/829918/836242/844074	4
T200	Up	67	GO:0010193	response to ozone	0.0182927	36/20450	0.00297739	0.0199834	0.0162917	819244/828481/834244	3
T200	Up	67	GO:0009962	regulation of flavonoid biosynthetic process	0.0304878	122/20450	0.00304388	0.0202472	0.0165067	815147/820355/829466/833550/838456	5
T200	Up	67	GO:0006470	protein dephosphorylation	0.0365854	180/20450	0.00335163	0.0220799	0.0180008	820355/823706/824807/834790/836211/839748	6
T200	Up	67	GO:0015931	nucleobase-containing compound transport	0.0304878	125/20450	0.00337866	0.0220799	0.0180008	819693/820355/829918/836242/844074	5
T200	Up	67	GO:0009861	jasmonic acid and ethylene-dependent systemic resistance	0.0121951	12/20450	0.00400199	0.025926	0.0211364	819244/820429	2
T200	Up	67	GO:0000302	response to reactive oxygen species	0.0487805	318/20450	0.0042183	0.0270917	0.0220868	819244/827463/828053/828481/834244/836437/837253/842198	8
T200	Up	67	GO:0010286	heat acclimation	0.0243902	84/20450	0.00467724	0.0297041	0.0242165	818429/818627/830934/834244	4
T200	Up	67	GO:0006596	polyamine biosynthetic process	0.0121951	13/20450	0.00470481	0.0297041	0.0242165	821214/829623	2
T200	Up	67	GO:0045089	positive regulation of innate immune response	0.0182927	44/20450	0.00527054	0.0328935	0.0268168	819244/820752/824807	3
T200	Up	67	GO:0035304	regulation of protein dephosphorylation	0.0304878	139/20450	0.00529829	0.0328935	0.0268168	820355/823706/824807/836211/839748	5
T200	Up	67	GO:0035303	regulation of dephosphorylation	0.0304878	140/20450	0.0054597	0.0336155	0.0274054	820355/823706/824807/836211/839748	5
T200	Up	67	GO:0006888	ER to Golgi vesicle-mediated transport	0.0243902	89/20450	0.00573924	0.035047	0.0285724	820355/829918/836242/844074	4
T200	Up	67	GO:0002684	positive regulation of immune system process	0.0182927	46/20450	0.00597093	0.0358738	0.0292464	819244/820752/824807	3
T200	Up	67	GO:0050778	positive regulation of immune response	0.0182927	46/20450	0.00597093	0.0358738	0.0292464	819244/820752/824807	3
T200	Up	67	GO:0016311	dephosphorylation	0.0365854	206/20450	0.00642786	0.03831	0.0312326	820355/823706/824807/834790/836211/839748	6
T200	Up	67	GO:2001057	reactive nitrogen species metabolic process	0.0121951	16/20450	0.00712494	0.0421276	0.0343449	835427/842958	2
T200	Up	67	GO:0043269	regulation of ion transport	0.0304878	150/20450	0.00726962	0.0426446	0.0347664	820355/829567/829918/836242/844074	5
T200	Up	67	GO:0032879	regulation of localization	0.0365854	213/20450	0.00752453	0.0437951	0.0357044	818741/820355/829567/829918/836242/844074	6
TME3	Down	12	GO:0010200	response to chitin	0.194969	421/20450	1.47061e-21	1.17061e-18	9.79893e-19	816913/818166/818409/818588/818605/819260/820355/820924/821402/823815/824608/825399/826812/827435/828516/828559/829536/829880/831854/832285/834836/836074/837428/838456/838501/839265/839666/843584/844163/28719408/28720712	31
TME3	Down	12	GO:0010243	response to organonitrogen compound	0.194969	443/20450	6.59332e-21	2.62414e-18	2.19662e-18	816913/818166/818409/818588/818605/819260/820355/820924/821402/823815/824608/825399/826812/827435/828516/828559/829536/829880/831854/832285/834836/836074/837428/838456/838501/839265/839666/843584/844163/28719408/28720712	31
TME3	Down	12	GO:0009611	response to wounding	0.125786	335/20450	1.76353e-12	4.67924e-10	3.9169e-10	816913/817553/819260/820355/820924/823815/826618/828540/828559/837071/837428/838456/838501/839265/839666/839748/843584/843982/844002/28719408	20
TME3	Down	12	GO:0008219	cell death	0.144654	496/20450	6.28392e-12	1.2505e-09	1.04677e-09	814657/817746/818166/818409/818605/818705/819260/819889/820355/820771/820924/821356/824608/827435/828229/829536/837276/837428/838456/838501/839748/839808/844074	23
TME3	Down	12	GO:0009692	ethylene metabolic process	0.0754717	119/20450	1.48815e-10	1.18456e-08	9.91575e-09	816913/818705/823815/827435/828540/828559/832285/834244/834836/836074/839748/28720712	12
TME3	Down	12	GO:0009693	ethylene biosynthetic process	0.0754717	119/20450	1.48815e-10	1.18456e-08	9.91575e-09	816913/818705/823815/827435/828540/828559/832285/834244/834836/836074/839748/28720712	12
TME3	Down	12	GO:0043449	cellular alkene metabolic process	0.0754717	119/20450	1.48815e-10	1.18456e-08	9.91575e-09	816913/818705/823815/827435/828540/828559/832285/834244/834836/836074/839748/28720712	12
TME3	Down	12	GO:0043450	alkene biosynthetic process	0.0754717	119/20450	1.48815e-10	1.18456e-08	9.91575e-09	816913/818705/823815/827435/828540/828559/832285/834244/834836/836074/839748/28720712	12
TME3	Down	12	GO:1900673	olefin metabolic process	0.0754717	119/20450	1.48815e-10	1.18456e-08	9.91575e-09	816913/818705/823815/827435/828540/828559/832285/834244/834836/836074/839748/28720712	12
TME3	Down	12	GO:1900674	olefin biosynthetic process	0.0754717	119/20450	1.48815e-10	1.18456e-08	9.91575e-09	816913/818705/823815/827435/828540/828559/832285/834244/834836/836074/839748/28720712	12
TME3	Down	12	GO:0035556	intracellular signal transduction	0.132075	495/20450	2.87704e-10	2.08193e-08	1.74274e-08	818166/818409/818605/819260/820355/820924/822462/823815/827435/832285/833930/835956/836074/836412/836843/837276/838501/839666/839748/843584/28719408	21
TME3	Down	12	GO:0009626	plant-type hypersensitive response	0.119497	400/20450	3.3078e-10	2.11214e-08	1.76803e-08	818166/818409/818605/819260/819889/820355/820771/820924/821356/824608/827435/829536/837276/837428/838456/838501/839748/839808/844074	19
TME3	Down	12	GO:0034050	host programmed cell death induced by symbiont	0.119497	401/20450	3.44948e-10	2.11214e-08	1.76803e-08	818166/818409/818605/819260/819889/820355/820771/820924/821356/824608/827435/829536/837276/837428/838456/838501/839748/839808/844074	19
TME3	Down	12	GO:0012501	programmed cell death	0.119497	448/20450	2.17513e-09	1.07934e-07	9.03492e-08	818166/818409/818605/819260/819889/820355/820771/820924/821356/824608/827435/829536/837276/837428/838456/838501/839748/839808/844074	19
TME3	Down	12	GO:0030968	endoplasmic reticulum unfolded protein response	0.081761	185/20450	2.26954e-09	1.07934e-07	9.03492e-08	818409/818605/819260/820355/822462/829536/834244/836074/837276/838501/839748/5007686/28719408	13
TME3	Down	12	GO:0006986	response to unfolded protein	0.081761	187/20450	2.58766e-09	1.07934e-07	9.03492e-08	818409/818605/819260/820355/822462/829536/834244/836074/837276/838501/839748/5007686/28719408	13
TME3	Down	12	GO:0034620	cellular response to unfolded protein	0.081761	187/20450	2.58766e-09	1.07934e-07	9.03492e-08	818409/818605/819260/820355/822462/829536/834244/836074/837276/838501/839748/5007686/28719408	13
TME3	Down	12	GO:0035967	cellular response to topologically incorrect protein	0.081761	187/20450	2.58766e-09	1.07934e-07	9.03492e-08	818409/818605/819260/820355/822462/829536/834244/836074/837276/838501/839748/5007686/28719408	13
TME3	Down	12	GO:0002679	respiratory burst involved in defense response	0.0691824	121/20450	2.7119e-09	1.07934e-07	9.03492e-08	818166/818605/819260/820355/820924/823815/824608/827435/832285/836074/839666	11
TME3	Down	12	GO:0045730	respiratory burst	0.0691824	121/20450	2.7119e-09	1.07934e-07	9.03492e-08	818166/818605/819260/820355/820924/823815/824608/827435/832285/836074/839666	11
TME3	Down	12	GO:0071396	cellular response to lipid	0.106918	381/20450	7.61416e-09	2.88613e-07	2.41592e-07	817553/818409/819260/820355/821251/822462/832285/835956/836843/837276/838501/839265/839666/839748/842953/843513/28719408	17
TME3	Down	12	GO:0009738	abscisic acid-activated signaling pathway	0.0880503	248/20450	9.10185e-09	3.29322e-07	2.75669e-07	817553/818409/819260/820355/822462/832285/835956/836843/837276/838501/839265/839666/839748/28719408	14
TME3	Down	12	GO:0010941	regulation of cell death	0.106918	404/20450	1.80767e-08	6.09769e-07	5.10425e-07	817746/818166/818409/818605/819260/820355/820771/820924/821356/827435/829536/837276/837428/838456/838501/839748/844074	17
TME3	Down	12	GO:0071215	cellular response to abscisic acid stimulus	0.0880503	263/20450	1.9151e-08	6.09769e-07	5.10425e-07	817553/818409/819260/820355/822462/832285/835956/836843/837276/838501/839265/839666/839748/28719408	14
TME3	Down	12	GO:0097306	cellular response to alcohol	0.0880503	263/20450	1.9151e-08	6.09769e-07	5.10425e-07	817553/818409/819260/820355/822462/832285/835956/836843/837276/838501/839265/839666/839748/28719408	14
TME3	Down	12	GO:0010363	regulation of plant-type hypersensitive response	0.100629	371/20450	3.46029e-08	1.05938e-06	8.86787e-07	818166/818409/818605/819260/820355/820771/820924/821356/827435/829536/837276/837428/838456/838501/839748/844074	16
TME3	Down	12	GO:0006612	protein targeting to membrane	0.100629	374/20450	3.86869e-08	1.14055e-06	9.5473e-07	818166/818409/818605/819260/820355/820771/820924/821356/827435/829536/837276/837428/838456/838501/839748/844074	16
TME3	Down	12	GO:0072657	protein localization to membrane	0.100629	377/20450	4.32066e-08	1.18595e-06	9.92731e-07	818166/818409/818605/819260/820355/820771/820924/821356/827435/829536/837276/837428/838456/838501/839748/844074	16
TME3	Down	12	GO:0090150	establishment of protein localization to membrane	0.100629	377/20450	4.32066e-08	1.18595e-06	9.92731e-07	818166/818409/818605/819260/820355/820771/820924/821356/827435/829536/837276/837428/838456/838501/839748/844074	16
TME3	Down	12	GO:0080135	regulation of cellular response to stress	0.100629	385/20450	5.7715e-08	1.53137e-06	1.28188e-06	818166/818409/818605/819260/820355/820771/820924/821356/827435/829536/837276/837428/838456/838501/839748/844074	16
TME3	Down	12	GO:0043069	negative regulation of programmed cell death	0.0691824	168/20450	8.38165e-08	2.11284e-06	1.76861e-06	818166/818409/818605/819260/820355/829536/837276/837428/838501/839748/844074	11
TME3	Down	12	GO:0043067	regulation of programmed cell death	0.100629	396/20450	8.49381e-08	2.11284e-06	1.76861e-06	818166/818409/818605/819260/820355/820771/820924/821356/827435/829536/837276/837428/838456/838501/839748/844074	16
TME3	Down	12	GO:0050832	defense response to fungus	0.0943396	350/20450	1.02825e-07	2.48027e-06	2.07619e-06	816913/817553/818166/818409/818506/818605/819260/820355/820924/837071/837276/838501/839748/839808/28720712	15
TME3	Down	12	GO:0060548	negative regulation of cell death	0.0691824	172/20450	1.06569e-07	2.49497e-06	2.08849e-06	818166/818409/818605/819260/820355/829536/837276/837428/838501/839748/844074	11
TME3	Down	12	GO:0034976	response to endoplasmic reticulum stress	0.0943396	357/20450	1.32883e-07	3.02215e-06	2.52978e-06	818409/818506/818605/819260/820355/820438/822462/829536/834244/836074/837276/838501/839748/5007686/28719408	15
TME3	Down	12	GO:0009414	response to water deprivation	0.100629	418/20450	1.7713e-07	3.83211e-06	3.20779e-06	816293/818166/818741/819260/820355/820428/820443/823815/836074/836843/837071/838501/839265/839666/839748/5007686	16
TME3	Down	12	GO:0009753	response to jasmonic acid	0.106918	474/20450	1.8069e-07	3.83211e-06	3.20779e-06	818166/818409/819260/820355/820924/821251/827435/828540/829880/837276/838501/839265/839666/839748/842953/843584/28719408	17
TME3	Down	12	GO:0045088	regulation of innate immune response	0.100629	419/20450	1.8294e-07	3.83211e-06	3.20779e-06	818166/818409/818605/819260/820355/820771/820924/821356/827435/829536/837276/837428/838456/838501/839748/844074	16
TME3	Down	12	GO:0050776	regulation of immune response	0.100629	421/20450	1.95083e-07	3.9817e-06	3.333e-06	818166/818409/818605/819260/820355/820771/820924/821356/827435/829536/837276/837428/838456/838501/839748/844074	16
TME3	Down	12	GO:0002682	regulation of immune system process	0.100629	424/20450	2.14675e-07	4.27203e-06	3.57603e-06	818166/818409/818605/819260/820355/820771/820924/821356/827435/829536/837276/837428/838456/838501/839748/844074	16
TME3	Down	12	GO:0009415	response to water	0.100629	426/20450	2.28711e-07	4.44035e-06	3.71693e-06	816293/818166/818741/819260/820355/820428/820443/823815/836074/836843/837071/838501/839265/839666/839748/5007686	16
TME3	Down	12	GO:0009612	response to mechanical stimulus	0.0440252	63/20450	5.77677e-07	1.09484e-05	9.16465e-06	816913/820924/823815/828559/837428/838456/839666	7
TME3	Down	12	GO:0006972	hyperosmotic response	0.0754717	250/20450	6.23491e-07	1.15418e-05	9.66144e-06	818741/819260/820355/820428/821251/830336/836843/838501/839265/839666/839748/842953	12
TME3	Down	12	GO:0009723	response to ethylene	0.0880503	353/20450	7.08832e-07	1.28234e-05	1.07342e-05	820355/821251/823815/827435/829880/832285/836074/836843/838501/839666/839748/842953/843393/843584	14
TME3	Down	12	GO:0051865	protein autoubiquitination	0.0251572	11/20450	1.11292e-06	1.96864e-05	1.64791e-05	818166/820443/823815/836074	4
TME3	Down	12	GO:0035966	response to topologically incorrect protein	0.0880503	369/20450	1.19867e-06	2.07422e-05	1.73629e-05	818409/818605/819260/820355/822462/829536/834244/834807/836074/837276/838501/839748/5007686/28719408	14
TME3	Down	12	GO:0002252	immune effector process	0.0754717	279/20450	1.97322e-06	3.34188e-05	2.79742e-05	818166/818605/819260/820355/820924/823815/824608/826385/827435/832285/836074/839666	12
TME3	Down	12	GO:0009751	response to salicylic acid	0.0943396	473/20450	4.49289e-06	7.45071e-05	6.23684e-05	818166/818409/818588/818605/819260/820355/820924/821251/827435/829880/837276/838501/839748/842953/843161	15
TME3	Down	12	GO:0042538	hyperosmotic salinity response	0.0566038	161/20450	4.82218e-06	7.83359e-05	6.55734e-05	819260/820355/821251/836843/838501/839265/839666/839748/842953	9
TME3	Down	12	GO:0035690	cellular response to drug	0.081761	390/20450	1.18175e-05	0.000188135	0.000157484	818166/818409/818605/819260/820355/820924/820985/821251/827435/837276/838501/839748/842953	13
TME3	Down	12	GO:0000160	phosphorelay signal transduction system	0.0503145	138/20450	1.26293e-05	0.000196196	0.000164232	823815/827435/832285/833930/836074/836412/839666/843584	8
TME3	Down	12	GO:0071407	cellular response to organic cyclic compound	0.081761	393/20450	1.28168e-05	0.000196196	0.000164232	818166/818409/818605/819260/820355/820924/821251/827435/837276/838501/839748/842953/843513	13
TME3	Down	12	GO:0009867	jasmonic acid mediated signaling pathway	0.0691824	286/20450	1.53071e-05	0.000225638	0.000188877	818166/818409/819260/820355/820924/821251/827435/837276/838501/839748/842953	11
TME3	Down	12	GO:0071395	cellular response to jasmonic acid stimulus	0.0691824	286/20450	1.53071e-05	0.000225638	0.000188877	818166/818409/819260/820355/820924/821251/827435/837276/838501/839748/842953	11
TME3	Down	12	GO:0009863	salicylic acid mediated signaling pathway	0.0754717	353/20450	2.13448e-05	0.000308918	0.000258589	818166/818409/818605/819260/820355/820924/821251/827435/837276/838501/839748/842953	12
TME3	Down	12	GO:0071446	cellular response to salicylic acid stimulus	0.0754717	355/20450	2.25643e-05	0.000320736	0.000268482	818166/818409/818605/819260/820355/820924/821251/827435/837276/838501/839748/842953	12
TME3	Down	12	GO:0071236	cellular response to antibiotic	0.0754717	364/20450	2.88351e-05	0.00040268	0.000337075	818166/818409/818605/819260/820355/820924/821251/827435/837276/838501/839748/842953	12
TME3	Down	12	GO:0048585	negative regulation of response to stimulus	0.0754717	367/20450	3.1238e-05	0.000428715	0.000358869	818166/818409/819260/820355/820924/821251/828957/837276/838501/839265/839748/842953	12
TME3	Down	12	GO:0072593	reactive oxygen species metabolic process	0.0754717	374/20450	3.75327e-05	0.000506373	0.000423875	818166/818409/818741/820355/820461/820924/821251/824454/839748/841755/842953/842958	12
TME3	Down	12	GO:0015802	basic amino acid transport	0.0251572	27/20450	5.37144e-05	0.000712611	0.000596513	818409/820355/837428/844074	4
TME3	Down	12	GO:0000165	MAPK cascade	0.0566038	221/20450	5.98178e-05	0.000767983	0.000642863	818166/818409/819260/820355/820924/832285/837276/838501/839748	9
TME3	Down	12	GO:0023014	signal transduction by protein phosphorylation	0.0566038	221/20450	5.98178e-05	0.000767983	0.000642863	818166/818409/819260/820355/820924/832285/837276/838501/839748	9
TME3	Down	12	GO:0042742	defense response to bacterium	0.0754717	398/20450	6.82191e-05	0.000861942	0.000721515	818166/818409/818588/820355/820461/820924/832285/838501/839748/843331/843393/843513	12
TME3	Down	12	GO:0009695	jasmonic acid biosynthetic process	0.0440252	135/20450	9.06043e-05	0.00112689	0.000943298	828540/838501/839265/839666/839748/843584/28719408	7
TME3	Down	12	GO:0015696	ammonium transport	0.0251572	31/20450	9.40006e-05	0.00115115	0.000963601	818409/820355/837428/844074	4
TME3	Down	12	GO:0052542	defense response by callose deposition	0.0314465	63/20450	0.000130341	0.00157199	0.00131588	828516/829536/834244/843584/844163	5
TME3	Down	12	GO:2000377	regulation of reactive oxygen species metabolic process	0.0503145	205/20450	0.000206963	0.00245885	0.00205825	818166/818409/820355/820924/821251/839748/842953/842958	8
TME3	Down	12	GO:0006862	nucleotide transport	0.0251572	39/20450	0.000234126	0.00274066	0.00229415	818409/820355/837428/844074	4
TME3	Down	12	GO:0009694	jasmonic acid metabolic process	0.0440252	158/20450	0.000240432	0.00277368	0.00232179	828540/838501/839265/839666/839748/843584/28719408	7
TME3	Down	12	GO:0043090	amino acid import	0.0314465	74/20450	0.000278906	0.00317156	0.00265485	818409/818506/820355/837428/844074	5
TME3	Down	12	GO:0031348	negative regulation of defense response	0.0566038	277/20450	0.000326883	0.00366477	0.0030677	818166/818409/819260/820355/820924/828957/837276/838501/839748	9
TME3	Down	12	GO:0009642	response to light intensity	0.0566038	283/20450	0.000382181	0.00422523	0.00353685	816293/818588/818741/820438/837071/837428/839666/844245/5007686	9
TME3	Down	12	GO:0009873	ethylene-activated signaling pathway	0.0377358	125/20450	0.000440239	0.00480041	0.00401833	823815/827435/832285/836074/839666/843584	6
TME3	Down	12	GO:0006888	ER to Golgi vesicle-mediated transport	0.0314465	89/20450	0.000654589	0.00702278	0.00587863	818409/818506/820355/837428/844074	5
TME3	Down	12	GO:0015748	organophosphate ester transport	0.0251572	51/20450	0.000661694	0.00702278	0.00587863	818409/820355/837428/844074	4
TME3	Down	12	GO:0009627	systemic acquired resistance	0.0691824	446/20450	0.000753895	0.00789606	0.00660963	818166/818409/818506/819260/820355/820924/828957/837276/837667/838501/839748	11
TME3	Down	12	GO:0009862	systemic acquired resistance, salicylic acid mediated signaling pathway	0.0503145	251/20450	0.00079478	0.00814431	0.00681744	818166/818409/819260/820355/820924/837276/838501/839748	8
TME3	Down	12	GO:0016567	protein ubiquitination	0.0440252	193/20450	0.000798061	0.00814431	0.00681744	818166/820438/820443/821402/823815/836074/839808	7
TME3	Down	12	GO:0006865	amino acid transport	0.0503145	255/20450	0.000880355	0.00887041	0.00742524	818409/818506/820355/824608/828540/837428/838043/844074	8
TME3	Down	12	GO:0071369	cellular response to ethylene stimulus	0.0377358	144/20450	0.000927008	0.00922373	0.007721	823815/827435/832285/836074/839666/843584	6
TME3	Down	12	GO:0052545	callose localization	0.0314465	97/20450	0.000967049	0.00950335	0.00795506	828516/829536/834244/843584/844163	5
TME3	Down	12	GO:0033037	polysaccharide localization	0.0314465	100/20450	0.00110889	0.0107643	0.00901059	828516/829536/834244/843584/844163	5
TME3	Down	12	GO:0042743	hydrogen peroxide metabolic process	0.0566038	334/20450	0.00123975	0.0118897	0.0099526	818166/818409/818741/820355/820461/820924/824454/839748/841755	9
TME3	Down	12	GO:0032446	protein modification by small protein conjugation	0.0440252	213/20450	0.00141406	0.0133999	0.0112168	818166/820438/820443/821402/823815/836074/839808	7
TME3	Down	12	GO:0050801	ion homeostasis	0.0566038	342/20450	0.00145958	0.0136686	0.0114417	820461/820771/827332/828516/835406/841755/842198/842203/843410	9
TME3	Down	12	GO:0015849	organic acid transport	0.0503145	280/20450	0.00159739	0.0146152	0.0122341	818409/818506/820355/824608/828540/837428/838043/844074	8
TME3	Down	12	GO:0046942	carboxylic acid transport	0.0503145	280/20450	0.00159739	0.0146152	0.0122341	818409/818506/820355/824608/828540/837428/838043/844074	8
TME3	Down	12	GO:0055065	metal ion homeostasis	0.0440252	227/20450	0.00203071	0.0183687	0.015376	820771/827332/835406/841755/842198/842203/843410	7
TME3	Down	12	GO:0042744	hydrogen peroxide catabolic process	0.0251572	72/20450	0.00240132	0.021477	0.017978	818741/820461/824454/841755	4
TME3	Down	12	GO:0017001	antibiotic catabolic process	0.0251572	73/20450	0.00252536	0.0223354	0.0186965	818741/820461/824454/841755	4
TME3	Down	12	GO:0015711	organic anion transport	0.0503145	302/20450	0.00255544	0.022353	0.0187113	818409/818506/820355/824608/828540/837428/838043/844074	8
TME3	Down	12	GO:0009646	response to absence of light	0.0188679	37/20450	0.00295199	0.0255411	0.02138	818588/818741/837428	3
TME3	Down	12	GO:0048193	Golgi vesicle transport	0.0503145	310/20450	0.00299816	0.0256617	0.0214809	818409/818506/820355/826812/831693/837276/837428/844074	8
TME3	Down	12	GO:0010325	raffinose family oligosaccharide biosynthetic process	0.0125786	11/20450	0.00315531	0.0267194	0.0223663	821251/842953	2
TME3	Down	12	GO:0048878	chemical homeostasis	0.0566038	386/20450	0.00329395	0.0275599	0.0230699	820461/820771/827332/828516/835406/841755/842198/842203/843410	9
TME3	Down	12	GO:0098771	inorganic ion homeostasis	0.0440252	248/20450	0.00332381	0.0275599	0.0230699	820771/827332/835406/841755/842198/842203/843410	7
TME3	Down	12	GO:0055080	cation homeostasis	0.0503145	318/20450	0.00349858	0.02871	0.0240325	820461/820771/827332/835406/841755/842198/842203/843410	8
TME3	Down	12	GO:0016999	antibiotic metabolic process	0.0628931	470/20450	0.00380413	0.0308988	0.0258648	818166/818409/818741/820355/820461/820924/824454/839748/841755/843206	10
TME3	Down	12	GO:0051187	cofactor catabolic process	0.0314465	136/20450	0.00424278	0.0341137	0.0285559	818741/820461/824454/825280/841755	5
TME3	Down	12	GO:0006979	response to oxidative stress	0.0628931	485/20450	0.00473437	0.0376855	0.0315458	818588/820428/820438/820985/822462/834244/835102/839666/842198/843584	10
TME3	Down	12	GO:0017014	protein nitrosylation	0.0125786	15/20450	0.00590216	0.04606	0.0385559	820461/824454	2
TME3	Down	12	GO:0018119	peptidyl-cysteine S-nitrosylation	0.0125786	15/20450	0.00590216	0.04606	0.0385559	820461/824454	2
TME3	Down	12	GO:0043269	regulation of ion transport	0.0314465	150/20450	0.00639741	0.0494402	0.0413854	818409/820355/837428/844074/844245	5
TME3	Down	12	GO:0032879	regulation of localization	0.0377358	213/20450	0.00650062	0.0495811	0.0415033	818409/818741/820355/837428/844074/844245	6
TME3	Down	12	GO:0009312	oligosaccharide biosynthetic process	0.0188679	49/20450	0.00654022	0.0495811	0.0415033	821251/842953/843410	3
TME3	Down	12	GO:0009937	regulation of gibberellic acid mediated signaling pathway	0.0125786	16/20450	0.00671107	0.0499254	0.0417915	821251/842953	2
TME3	Down	12	GO:0018198	peptidyl-cysteine modification	0.0125786	16/20450	0.00671107	0.0499254	0.0417915	820461/824454	2
TME3	Down	12	GO:0040008	regulation of growth	0.0823529	306/20450	0.000285519	0.0216637	0.0207752	815145/818649/818884/829788/830022/830915/836699	7
TME3	Up	32	GO:0009753	response to jasmonic acid	0.291262	474/20450	6.33375e-25	3.96493e-22	2.97353e-22	815160/817295/817586/821055/821904/823650/824807/825297/825476/827377/828053/828849/829880/830443/832214/832524/834210/834273/835821/836464/838122/838314/838501/838639/839265/839545/839893/840158/842428/844423	30
TME3	Up	32	GO:0009694	jasmonic acid metabolic process	0.174757	158/20450	1.11821e-19	3.5e-17	2.62486e-17	815160/817586/821055/821904/823650/829022/830443/834273/835821/836464/838314/838501/838639/839265/839545/839893/840158/844423	18
TME3	Up	32	GO:0009611	response to wounding	0.213592	335/20450	1.19284e-18	2.48907e-16	1.8667e-16	815160/817586/821055/821904/823650/827377/828053/828849/830443/832214/834273/836464/838314/838501/838639/839265/839893/840158/842428/843685/843982/844423	22
TME3	Up	32	GO:0009695	jasmonic acid biosynthetic process	0.145631	135/20450	2.21832e-16	3.47167e-14	2.60361e-14	815160/817586/821055/821904/823650/829022/830443/834273/838314/838501/838639/839265/839893/840158/844423	15
TME3	Up	32	GO:0009867	jasmonic acid mediated signaling pathway	0.165049	286/20450	7.27271e-14	7.58786e-12	5.69058e-12	815160/817295/821055/821904/824807/825476/828053/830443/832214/832524/834210/834273/838122/838501/839893/840158/844423	17
TME3	Up	32	GO:0071395	cellular response to jasmonic acid stimulus	0.165049	286/20450	7.27271e-14	7.58786e-12	5.69058e-12	815160/817295/821055/821904/824807/825476/828053/830443/832214/832524/834210/834273/838122/838501/839893/840158/844423	17
TME3	Up	32	GO:0009738	abscisic acid-activated signaling pathway	0.15534	248/20450	1.18384e-13	1.05869e-11	7.93976e-12	815160/817586/821904/824761/825476/827464/828053/828849/832662/834210/836843/838122/838501/839265/840158/844423	16
TME3	Up	32	GO:0009723	response to ethylene	0.174757	353/20450	1.74179e-13	1.36295e-11	1.02216e-11	815160/817087/817586/821891/821904/824761/825476/827464/828849/829880/829891/832662/836843/838122/838501/839143/843685/844423	18
TME3	Up	32	GO:0071215	cellular response to abscisic acid stimulus	0.15534	263/20450	2.93426e-13	1.73776e-11	1.30325e-11	815160/817586/821904/824761/825476/827464/828053/828849/832662/834210/836843/838122/838501/839265/840158/844423	16
TME3	Up	32	GO:0097306	cellular response to alcohol	0.15534	263/20450	2.93426e-13	1.73776e-11	1.30325e-11	815160/817586/821904/824761/825476/827464/828053/828849/832662/834210/836843/838122/838501/839265/840158/844423	16
TME3	Up	32	GO:0010200	response to chitin	0.184466	421/20450	3.05358e-13	1.73776e-11	1.30325e-11	814962/818588/821904/824608/824807/827464/829880/832524/832662/834273/838122/838314/838501/838639/839265/840158/842428/843685/844423	19
TME3	Up	32	GO:0071396	cellular response to lipid	0.174757	381/20450	6.35893e-13	3.31724e-11	2.48779e-11	815160/817586/819014/821904/824761/825476/827464/828053/828849/830708/832662/834210/836843/838122/838501/839265/840158/844423	18
TME3	Up	32	GO:0010243	response to organonitrogen compound	0.184466	443/20450	7.51944e-13	3.6209e-11	2.71552e-11	814962/818588/821904/824608/824807/827464/829880/832524/832662/834273/838122/838314/838501/838639/839265/840158/842428/843685/844423	19
TME3	Up	32	GO:0035556	intracellular signal transduction	0.184466	495/20450	5.25144e-12	2.34815e-10	1.76101e-10	817087/817586/821891/821904/824761/824807/825476/827464/828053/832524/832662/834210/834273/836843/838122/838501/839143/843685/844423	19
TME3	Up	32	GO:0009626	plant-type hypersensitive response	0.165049	400/20450	1.585e-11	6.44979e-10	4.83707e-10	817295/824608/824761/824807/825476/828053/829466/832214/832524/832662/833550/834210/834273/838122/838501/840158/844423	17
TME3	Up	32	GO:0034050	host programmed cell death induced by symbiont	0.165049	401/20450	1.64851e-11	6.44979e-10	4.83707e-10	817295/824608/824761/824807/825476/828053/829466/832214/832524/832662/833550/834210/834273/838122/838501/840158/844423	17
TME3	Up	32	GO:0010941	regulation of cell death	0.165049	404/20450	1.85348e-11	6.82518e-10	5.1186e-10	817295/817746/824761/824807/825476/828053/829466/832214/832524/832662/833550/834210/834273/838122/838501/840158/844423	17
TME3	Up	32	GO:0008219	cell death	0.174757	496/20450	5.09156e-11	1.76035e-09	1.32019e-09	817295/817746/824608/824761/824807/825476/828053/829466/832214/832524/832662/833550/834210/834273/838122/838501/840158/844423	18
TME3	Up	32	GO:0010363	regulation of plant-type hypersensitive response	0.15534	371/20450	5.34291e-11	1.76035e-09	1.32019e-09	817295/824761/824807/825476/828053/829466/832214/832524/832662/833550/834210/834273/838122/838501/840158/844423	16
TME3	Up	32	GO:0006612	protein targeting to membrane	0.15534	374/20450	6.02019e-11	1.88432e-09	1.41316e-09	817295/824761/824807/825476/828053/829466/832214/832524/832662/833550/834210/834273/838122/838501/840158/844423	16
TME3	Up	32	GO:0072657	protein localization to membrane	0.15534	377/20450	6.77605e-11	1.92809e-09	1.44599e-09	817295/824761/824807/825476/828053/829466/832214/832524/832662/833550/834210/834273/838122/838501/840158/844423	16
TME3	Up	32	GO:0090150	establishment of protein localization to membrane	0.15534	377/20450	6.77605e-11	1.92809e-09	1.44599e-09	817295/824761/824807/825476/828053/829466/832214/832524/832662/833550/834210/834273/838122/838501/840158/844423	16
TME3	Up	32	GO:0080135	regulation of cellular response to stress	0.15534	385/20450	9.24124e-11	2.4277e-09	1.82067e-09	817295/824761/824807/825476/828053/829466/832214/832524/832662/833550/834210/834273/838122/838501/840158/844423	16
TME3	Up	32	GO:0012501	programmed cell death	0.165049	448/20450	9.30747e-11	2.4277e-09	1.82067e-09	817295/824608/824761/824807/825476/828053/829466/832214/832524/832662/833550/834210/834273/838122/838501/840158/844423	17
TME3	Up	32	GO:0043067	regulation of programmed cell death	0.15534	396/20450	1.39939e-10	3.50407e-09	2.62791e-09	817295/824761/824807/825476/828053/829466/832214/832524/832662/833550/834210/834273/838122/838501/840158/844423	16
TME3	Up	32	GO:0045088	regulation of innate immune response	0.15534	419/20450	3.19932e-10	7.70297e-09	5.7769e-09	817295/824761/824807/825476/828053/829466/832214/832524/832662/833550/834210/834273/838122/838501/840158/844423	16
TME3	Up	32	GO:0050776	regulation of immune response	0.15534	421/20450	3.42942e-10	7.95117e-09	5.96305e-09	817295/824761/824807/825476/828053/829466/832214/832524/832662/833550/834210/834273/838122/838501/840158/844423	16
TME3	Up	32	GO:0002682	regulation of immune system process	0.15534	424/20450	3.80331e-10	8.50311e-09	6.37697e-09	817295/824761/824807/825476/828053/829466/832214/832524/832662/833550/834210/834273/838122/838501/840158/844423	16
TME3	Up	32	GO:0048585	negative regulation of response to stimulus	0.145631	367/20450	4.73424e-10	1.02194e-08	7.66415e-09	817087/821891/824807/825476/828053/828957/829466/832524/833550/834210/834273/838122/838501/839265/844423	15
TME3	Up	32	GO:0009751	response to salicylic acid	0.15534	473/20450	1.84727e-09	3.85464e-08	2.89081e-08	817295/818588/824807/825297/825476/828053/829880/832524/833550/834210/834273/838122/838501/840158/842428/844423	16
TME3	Up	32	GO:0042538	hyperosmotic salinity response	0.0970874	161/20450	8.6934e-09	1.75551e-07	1.31656e-07	815160/821904/825476/827464/828849/836843/838122/838501/839265/844356	10
TME3	Up	32	GO:0071407	cellular response to organic cyclic compound	0.135922	393/20450	1.08614e-08	2.12476e-07	1.59348e-07	817295/819014/824807/825476/828053/830708/832524/833550/834210/834273/838122/838501/840158/844423	14
TME3	Up	32	GO:0043069	negative regulation of programmed cell death	0.0970874	168/20450	1.30818e-08	2.48158e-07	1.86108e-07	824761/824807/825476/828053/832662/834210/838122/838501/840158/844423	10
TME3	Up	32	GO:0031348	negative regulation of defense response	0.116505	277/20450	1.53865e-08	2.83292e-07	2.12457e-07	824807/825476/828053/828957/829466/832524/833550/834210/834273/838122/838501/844423	12
TME3	Up	32	GO:0060548	negative regulation of cell death	0.0970874	172/20450	1.63856e-08	2.93067e-07	2.19788e-07	824761/824807/825476/828053/832662/834210/838122/838501/840158/844423	10
TME3	Up	32	GO:0009414	response to water deprivation	0.126214	418/20450	1.82621e-07	3.17558e-06	2.38155e-06	815160/821904/823650/825476/827464/828053/828849/836843/838122/838501/839265/840158/844356	13
TME3	Up	32	GO:0009863	salicylic acid mediated signaling pathway	0.116505	353/20450	2.17185e-07	3.61123e-06	2.70827e-06	817295/824807/825476/828053/832524/833550/834210/834273/838122/838501/840158/844423	12
TME3	Up	32	GO:0009415	response to water	0.126214	426/20450	2.26868e-07	3.61123e-06	2.70827e-06	815160/821904/823650/825476/827464/828053/828849/836843/838122/838501/839265/840158/844356	13
TME3	Up	32	GO:0009873	ethylene-activated signaling pathway	0.0776699	125/20450	2.2749e-07	3.61123e-06	2.70827e-06	817087/821891/821904/825476/827464/839143/843685/844423	8
TME3	Up	32	GO:0071446	cellular response to salicylic acid stimulus	0.116505	355/20450	2.3075e-07	3.61123e-06	2.70827e-06	817295/824807/825476/828053/832524/833550/834210/834273/838122/838501/840158/844423	12
TME3	Up	32	GO:0071236	cellular response to antibiotic	0.116505	364/20450	3.01619e-07	4.60521e-06	3.45371e-06	817295/824807/825476/828053/832524/833550/834210/834273/838122/838501/840158/844423	12
TME3	Up	32	GO:0000160	phosphorelay signal transduction system	0.0776699	138/20450	4.86299e-07	7.24817e-06	5.43582e-06	817087/821891/821904/825476/827464/839143/843685/844423	8
TME3	Up	32	GO:0006972	hyperosmotic response	0.0970874	250/20450	5.42687e-07	7.90051e-06	5.92505e-06	815160/821904/825476/827464/828849/836843/838122/838501/839265/844356	10
TME3	Up	32	GO:0009862	systemic acquired resistance, salicylic acid mediated signaling pathway	0.0970874	251/20450	5.62863e-07	8.008e-06	6.00567e-06	824807/825476/828053/832524/833550/834210/834273/838122/838501/844423	10
TME3	Up	32	GO:0035690	cellular response to drug	0.116505	390/20450	6.27435e-07	8.72832e-06	6.54588e-06	817295/824807/825476/828053/832524/833550/834210/834273/838122/838501/840158/844423	12
TME3	Up	32	GO:0071369	cellular response to ethylene stimulus	0.0776699	144/20450	6.72677e-07	9.15426e-06	6.86531e-06	817087/821891/821904/825476/827464/839143/843685/844423	8
TME3	Up	32	GO:0050832	defense response to fungus	0.106796	350/20450	1.54539e-06	2.05833e-05	1.54366e-05	818506/819941/824807/825476/828053/832524/834210/834273/838122/838501/844423	11
TME3	Up	32	GO:0000165	MAPK cascade	0.0873786	221/20450	1.77893e-06	2.27267e-05	1.70441e-05	824807/825476/828053/832524/834210/834273/838122/838501/844423	9
TME3	Up	32	GO:0023014	signal transduction by protein phosphorylation	0.0873786	221/20450	1.77893e-06	2.27267e-05	1.70441e-05	824807/825476/828053/832524/834210/834273/838122/838501/844423	9
TME3	Up	32	GO:0009627	systemic acquired resistance	0.116505	446/20450	2.54296e-06	3.18379e-05	2.38771e-05	818506/824807/825476/828053/828957/832524/833550/834210/834273/838122/838501/844423	12
TME3	Up	32	GO:0002679	respiratory burst involved in defense response	0.0582524	121/20450	3.39222e-05	0.000408372	0.000306262	821904/824608/824807/827464/832662/844423	6
TME3	Up	32	GO:0045730	respiratory burst	0.0582524	121/20450	3.39222e-05	0.000408372	0.000306262	821904/824608/824807/827464/832662/844423	6
TME3	Up	32	GO:0042435	indole-containing compound biosynthetic process	0.0582524	133/20450	5.76459e-05	0.000680874	0.000510627	815160/824807/834273/840158/843685/2746023	6
TME3	Up	32	GO:0043900	regulation of multi-organism process	0.0582524	146/20450	9.66929e-05	0.00112092	0.000840644	824807/832524/834273/838122/840158/844423	6
TME3	Up	32	GO:0042430	indole-containing compound metabolic process	0.0582524	147/20450	0.0001004	0.00114274	0.000857005	815160/824807/834273/840158/843685/2746023	6
TME3	Up	32	GO:0006568	tryptophan metabolic process	0.0485437	96/20450	0.000124944	0.00137219	0.00102908	815160/834273/840158/843685/2746023	5
TME3	Up	32	GO:0006586	indolalkylamine metabolic process	0.0485437	96/20450	0.000124944	0.00137219	0.00102908	815160/834273/840158/843685/2746023	5
TME3	Up	32	GO:0009595	detection of biotic stimulus	0.0485437	104/20450	0.0001821	0.00196543	0.00147399	824807/832524/834273/838122/844423	5
TME3	Up	32	GO:0044106	cellular amine metabolic process	0.0582524	167/20450	0.000201571	0.0021387	0.00160394	815160/834273/840158/843236/843685/2746023	6
TME3	Up	32	GO:0009072	aromatic amino acid family metabolic process	0.0679612	241/20450	0.000219461	0.00228971	0.00171719	815160/823650/834273/840158/843685/844356/2746023	7
TME3	Up	32	GO:0051606	detection of stimulus	0.0485437	144/20450	0.000812793	0.00834113	0.00625549	824807/832524/834273/838122/844423	5
TME3	Up	32	GO:0009646	response to absence of light	0.0291262	37/20450	0.000851313	0.00859552	0.00644628	818588/823888/844423	3
TME3	Up	32	GO:0042742	defense response to bacterium	0.0776699	398/20450	0.000912619	0.00906825	0.0068008	818588/824807/829466/832524/834273/838122/838501/844423	8
TME3	Up	32	GO:0009308	amine metabolic process	0.0582524	229/20450	0.00106965	0.0104625	0.00784646	815160/834273/840158/843236/843685/2746023	6
TME3	Up	32	GO:0006576	cellular biogenic amine metabolic process	0.0485437	157/20450	0.00119642	0.0115224	0.00864135	815160/834273/840158/843685/2746023	5
TME3	Up	32	GO:0009063	cellular amino acid catabolic process	0.0485437	160/20450	0.00130126	0.0123423	0.00925618	815160/823650/823888/834273/843685	5
TME3	Up	32	GO:0010120	camalexin biosynthetic process	0.0194175	11/20450	0.00134141	0.0123489	0.00926114	824807/843685	2
TME3	Up	32	GO:0052317	camalexin metabolic process	0.0194175	11/20450	0.00134141	0.0123489	0.00926114	824807/843685	2
TME3	Up	32	GO:0009625	response to insect	0.0291262	45/20450	0.00151003	0.0132153	0.00991091	824807/827377/833550	3
TME3	Up	32	GO:0009403	toxin biosynthetic process	0.0194175	12/20450	0.00160441	0.0132153	0.00991091	824807/843685	2
TME3	Up	32	GO:0009700	indole phytoalexin biosynthetic process	0.0194175	12/20450	0.00160441	0.0132153	0.00991091	824807/843685	2
TME3	Up	32	GO:0010105	negative regulation of ethylene-activated signaling pathway	0.0194175	12/20450	0.00160441	0.0132153	0.00991091	817087/821891	2
TME3	Up	32	GO:0046217	indole phytoalexin metabolic process	0.0194175	12/20450	0.00160441	0.0132153	0.00991091	824807/843685	2
TME3	Up	32	GO:0052314	phytoalexin metabolic process	0.0194175	12/20450	0.00160441	0.0132153	0.00991091	824807/843685	2
TME3	Up	32	GO:0052315	phytoalexin biosynthetic process	0.0194175	12/20450	0.00160441	0.0132153	0.00991091	824807/843685	2
TME3	Up	32	GO:0070298	negative regulation of phosphorelay signal transduction system	0.0194175	12/20450	0.00160441	0.0132153	0.00991091	817087/821891	2
TME3	Up	32	GO:0048584	positive regulation of response to stimulus	0.038835	101/20450	0.00170444	0.0138569	0.0103921	817746/824807/825476/830708	4
TME3	Up	32	GO:0009963	positive regulation of flavonoid biosynthetic process	0.038835	103/20450	0.00183159	0.0146997	0.0110242	829466/832214/833550/840158	4
TME3	Up	32	GO:0009312	oligosaccharide biosynthetic process	0.0291262	49/20450	0.00193224	0.0153112	0.0114827	825476/837152/838998	3
TME3	Up	32	GO:0042537	benzene-containing compound metabolic process	0.0582524	261/20450	0.00207822	0.016262	0.0121959	824807/832524/834273/838122/844356/844423	6
TME3	Up	32	GO:0042343	indole glucosinolate metabolic process	0.0194175	14/20450	0.00219766	0.0168127	0.0126088	824807/840158	2
TME3	Up	32	GO:0034976	response to endoplasmic reticulum stress	0.0679612	357/20450	0.0022023	0.0168127	0.0126088	818506/825476/828053/832524/834210/838501/844423	7
TME3	Up	32	GO:0030968	endoplasmic reticulum unfolded protein response	0.0485437	185/20450	0.00245754	0.0181078	0.0135801	825476/828053/834210/838501/844423	5
TME3	Up	32	GO:0010310	regulation of hydrogen peroxide metabolic process	0.0485437	186/20450	0.0025155	0.0181078	0.0135801	824807/832524/834273/838122/844423	5
TME3	Up	32	GO:0010104	regulation of ethylene-activated signaling pathway	0.0194175	15/20450	0.00252744	0.0181078	0.0135801	817087/821891	2
TME3	Up	32	GO:0070297	regulation of phosphorelay signal transduction system	0.0194175	15/20450	0.00252744	0.0181078	0.0135801	817087/821891	2
TME3	Up	32	GO:0006986	response to unfolded protein	0.0485437	187/20450	0.00257443	0.0181078	0.0135801	825476/828053/834210/838501/844423	5
TME3	Up	32	GO:0034620	cellular response to unfolded protein	0.0485437	187/20450	0.00257443	0.0181078	0.0135801	825476/828053/834210/838501/844423	5
TME3	Up	32	GO:0035967	cellular response to topologically incorrect protein	0.0485437	187/20450	0.00257443	0.0181078	0.0135801	825476/828053/834210/838501/844423	5
TME3	Up	32	GO:0002252	immune effector process	0.0582524	279/20450	0.00289535	0.0201388	0.0151032	821904/824608/824807/827464/832662/844423	6
TME3	Up	32	GO:0009692	ethylene metabolic process	0.038835	119/20450	0.0030942	0.0201768	0.0151317	838314/839893/842428/843685	4
TME3	Up	32	GO:0009693	ethylene biosynthetic process	0.038835	119/20450	0.0030942	0.0201768	0.0151317	838314/839893/842428/843685	4
TME3	Up	32	GO:0043449	cellular alkene metabolic process	0.038835	119/20450	0.0030942	0.0201768	0.0151317	838314/839893/842428/843685	4
TME3	Up	32	GO:0043450	alkene biosynthetic process	0.038835	119/20450	0.0030942	0.0201768	0.0151317	838314/839893/842428/843685	4
TME3	Up	32	GO:1900673	olefin metabolic process	0.038835	119/20450	0.0030942	0.0201768	0.0151317	838314/839893/842428/843685	4
TME3	Up	32	GO:1900674	olefin biosynthetic process	0.038835	119/20450	0.0030942	0.0201768	0.0151317	838314/839893/842428/843685	4
TME3	Up	32	GO:0016054	organic acid catabolic process	0.0679612	385/20450	0.00334851	0.0213895	0.0160412	815160/818239/823650/823888/829022/834273/843685	7
TME3	Up	32	GO:0046395	carboxylic acid catabolic process	0.0679612	385/20450	0.00334851	0.0213895	0.0160412	815160/818239/823650/823888/829022/834273/843685	7
TME3	Up	32	GO:0009962	regulation of flavonoid biosynthetic process	0.038835	122/20450	0.00338353	0.0213948	0.0160452	829466/832214/833550/840158	4
TME3	Up	32	GO:2000377	regulation of reactive oxygen species metabolic process	0.0485437	205/20450	0.00381529	0.0238837	0.0179118	824807/832524/834273/838122/844423	5
TME3	Up	32	GO:0051193	regulation of cofactor metabolic process	0.0485437	208/20450	0.00405751	0.0251485	0.0188603	824807/832524/834273/838122/844423	5
TME3	Up	32	GO:0009697	salicylic acid biosynthetic process	0.0485437	209/20450	0.00414064	0.0254122	0.0190581	824807/832524/834273/838122/844423	5
TME3	Up	32	GO:0009813	flavonoid biosynthetic process	0.0485437	217/20450	0.00485011	0.0294774	0.0221068	829466/832214/832524/833550/840158	5
TME3	Up	32	GO:0009968	negative regulation of signal transduction	0.0291262	68/20450	0.00490554	0.0295276	0.0221445	817087/821891/839265	3
TME3	Up	32	GO:0010648	negative regulation of cell communication	0.0291262	69/20450	0.00510997	0.0301778	0.022632	817087/821891/839265	3
TME3	Up	32	GO:0023057	negative regulation of signaling	0.0291262	69/20450	0.00510997	0.0301778	0.022632	817087/821891/839265	3
TME3	Up	32	GO:0046189	phenol-containing compound biosynthetic process	0.0485437	221/20450	0.00523548	0.03063	0.0229712	824807/832524/834273/838122/844423	5
TME3	Up	32	GO:0009696	salicylic acid metabolic process	0.0485437	222/20450	0.00533511	0.0309239	0.0231916	824807/832524/834273/838122/844423	5
TME3	Up	32	GO:0005992	trehalose biosynthetic process	0.0194175	22/20450	0.00543423	0.0309257	0.023193	837152/838998	2
TME3	Up	32	GO:0031408	oxylipin biosynthetic process	0.0194175	22/20450	0.00543423	0.0309257	0.023193	823650/834273	2
TME3	Up	32	GO:0009966	regulation of signal transduction	0.038835	140/20450	0.00551323	0.0310926	0.0233182	817087/821891/825476/839265	4
TME3	Up	32	GO:0023051	regulation of signaling	0.038835	142/20450	0.00579434	0.0323862	0.0242883	817087/821891/825476/839265	4
TME3	Up	32	GO:0010646	regulation of cell communication	0.038835	145/20450	0.0062337	0.0345336	0.0258987	817087/821891/825476/839265	4
TME3	Up	32	GO:0031407	oxylipin metabolic process	0.0194175	24/20450	0.00645049	0.0354211	0.0265643	823650/834273	2
TME3	Up	32	GO:0042743	hydrogen peroxide metabolic process	0.0582524	334/20450	0.00689812	0.0375497	0.0281607	824807/832524/834273/838122/841755/844423	6
TME3	Up	32	GO:0005991	trehalose metabolic process	0.0194175	25/20450	0.00698851	0.0377138	0.0282838	837152/838998	2
TME3	Up	32	GO:0018958	phenol-containing compound metabolic process	0.0485437	238/20450	0.00711743	0.0380813	0.0285594	824807/832524/834273/838122/844423	5
TME3	Up	32	GO:0006569	tryptophan catabolic process	0.0291262	79/20450	0.00743843	0.0391299	0.0293458	815160/834273/843685	3
TME3	Up	32	GO:0046218	indolalkylamine catabolic process	0.0291262	79/20450	0.00743843	0.0391299	0.0293458	815160/834273/843685	3
TME3	Up	32	GO:0009812	flavonoid metabolic process	0.0485437	244/20450	0.00788182	0.0411168	0.0308359	829466/832214/832524/833550/840158	5
TME3	Up	32	GO:0042436	indole-containing compound catabolic process	0.0291262	81/20450	0.00796768	0.0412212	0.0309142	815160/834273/843685	3
TME3	Up	32	GO:1902532	negative regulation of intracellular signal transduction	0.0194175	27/20450	0.00812327	0.0416817	0.0312595	817087/821891	2
TME3	Up	32	GO:0009074	aromatic amino acid family catabolic process	0.0291262	83/20450	0.00851861	0.0433003	0.0324734	815160/834273/843685	3
TME3	Up	32	GO:1901606	alpha-amino acid catabolic process	0.038835	159/20450	0.00857706	0.0433003	0.0324734	815160/823650/834273/843685	4
TME3	Up	32	GO:0002831	regulation of response to biotic stimulus	0.0194175	30/20450	0.00996916	0.0499255	0.037442	840158/844423	2
TME3	Down	67	GO:0006833	water transport	0.0714286	141/20450	0.000122545	0.0354768	0.0312167	820771/825317/827956/828051/837740	5
TME3	Down	67	GO:0042044	fluid transport	0.0714286	141/20450	0.000122545	0.0354768	0.0312167	820771/825317/827956/828051/837740	5
TME3	Up	67	GO:0009072	aromatic amino acid family metabolic process	0.12069	241/20450	5.21616e-06	0.000778537	0.000639025	817879/818470/820651/825524/840158/843750/2746023	7
TME3	Up	67	GO:0006576	cellular biogenic amine metabolic process	0.103448	157/20450	5.41596e-06	0.000778537	0.000639025	818470/820651/820967/840158/843750/2746023	6
TME3	Up	67	GO:0044106	cellular amine metabolic process	0.103448	167/20450	7.72053e-06	0.000778537	0.000639025	818470/820651/820967/840158/843750/2746023	6
TME3	Up	67	GO:0006568	tryptophan metabolic process	0.0862069	96/20450	7.72358e-06	0.000778537	0.000639025	818470/820651/840158/843750/2746023	5
TME3	Up	67	GO:0006586	indolalkylamine metabolic process	0.0862069	96/20450	7.72358e-06	0.000778537	0.000639025	818470/820651/840158/843750/2746023	5
TME3	Up	67	GO:0042435	indole-containing compound biosynthetic process	0.0862069	133/20450	3.74962e-05	0.00314968	0.00258527	818470/820651/840158/843750/2746023	5
TME3	Up	67	GO:0009308	amine metabolic process	0.103448	229/20450	4.59641e-05	0.00330942	0.00271637	818470/820651/820967/840158/843750/2746023	6
TME3	Up	67	GO:0042430	indole-containing compound metabolic process	0.0862069	147/20450	6.04485e-05	0.00380826	0.00312582	818470/820651/840158/843750/2746023	5
TME3	Up	67	GO:0046496	nicotinamide nucleotide metabolic process	0.12069	372/20450	8.43359e-05	0.00454378	0.00372954	816943/817879/821134/825524/837848/842016/843569	7
TME3	Up	67	GO:0019362	pyridine nucleotide metabolic process	0.12069	376/20450	9.01544e-05	0.00454378	0.00372954	816943/817879/821134/825524/837848/842016/843569	7
TME3	Up	67	GO:0072524	pyridine-containing compound metabolic process	0.12069	383/20450	0.000101124	0.00463333	0.00380305	816943/817879/821134/825524/837848/842016/843569	7
TME3	Up	67	GO:0006739	NADP metabolic process	0.0862069	186/20450	0.000182886	0.00744927	0.00611437	816943/817879/821134/825524/842016	5
TME3	Up	67	GO:0006733	oxidoreduction coenzyme metabolic process	0.12069	425/20450	0.000192144	0.00744927	0.00611437	816943/817879/821134/825524/837848/842016/843569	7
TME3	Up	67	GO:0009773	photosynthetic electron transport in photosystem I	0.0517241	46/20450	0.000301377	0.0107162	0.0087959	824379/837848/842016	3
TME3	Up	67	GO:0009310	amine catabolic process	0.0689655	117/20450	0.000340198	0.0107162	0.0087959	818470/820651/820967/843750	4
TME3	Up	67	GO:0042402	cellular biogenic amine catabolic process	0.0689655	117/20450	0.000340198	0.0107162	0.0087959	818470/820651/820967/843750	4
TME3	Up	67	GO:0009850	auxin metabolic process	0.0689655	143/20450	0.000725648	0.0215133	0.0176582	818470/820651/835767/843750	4
TME3	Up	67	GO:0009767	photosynthetic electron transport chain	0.0517241	64/20450	0.000797798	0.0223383	0.0183354	824379/837848/842016	3
TME3	Up	67	GO:0006569	tryptophan catabolic process	0.0517241	79/20450	0.00146935	0.0356936	0.0292974	818470/820651/843750	3
TME3	Up	67	GO:0046218	indolalkylamine catabolic process	0.0517241	79/20450	0.00146935	0.0356936	0.0292974	818470/820651/843750	3
TME3	Up	67	GO:0009624	response to nematode	0.0517241	80/20450	0.00152354	0.0356936	0.0292974	820651/831126/834463	3
TME3	Up	67	GO:0042436	indole-containing compound catabolic process	0.0517241	81/20450	0.00157897	0.0356936	0.0292974	818470/820651/843750	3
TME3	Up	67	GO:0009074	aromatic amino acid family catabolic process	0.0517241	83/20450	0.00169359	0.0356936	0.0292974	818470/820651/843750	3
TME3	Up	67	GO:0006098	pentose-phosphate shunt	0.0689655	182/20450	0.00177052	0.0356936	0.0292974	816943/817879/821134/825524	4
TME3	Up	67	GO:0051156	glucose 6-phosphate metabolic process	0.0689655	182/20450	0.00177052	0.0356936	0.0292974	816943/817879/821134/825524	4
TME3	Up	67	GO:0022900	electron transport chain	0.0517241	88/20450	0.00200255	0.0388186	0.0318624	824379/837848/842016	3
TME3	Up	67	GO:0019682	glyceraldehyde-3-phosphate metabolic process	0.0862069	335/20450	0.00257816	0.0481256	0.0395016	816943/817879/821134/824379/825524	5
TME3	Up	67	GO:0042254	ribosome biogenesis	0.0862069	338/20450	0.00267912	0.0482241	0.0395825	816492/829062/836588/837848/843569	5
TME3	Up	67	GO:0015979	photosynthesis	0.0862069	344/20450	0.00288963	0.0485457	0.0398464	821134/824379/825524/837848/842016	5
TME3	Up	67	GO:0022613	ribonucleoprotein complex biogenesis	0.0862069	344/20450	0.00288963	0.0485457	0.0398464	816492/829062/836588/837848/843569	5

## Sheet: Only_Sig
Enriched (adjusted p value <1E-08) biological processes used to create the heat map (figure 8)
Plant	Expression	Timepoint	ID	Description	Ratio	BgRatio	pvalue	p.adjust	qvalue	geneID	Count
T200	Up	32	GO:0010200	response to chitin	0.204878	421/20450	9.0144e-30	7.6983e-27	6.82248e-27	816913/817194/817778/818166/818319/818429/818588/818605/820355/820752/820924/821052/821134/821402/823706/823815/824608/825319/825399/827435/827463/828481/828559/828836/829536/829591/829918/832285/832750/833727/834770/835193/838314/838456/838501/838981/839666/842428/843500/844163/844423/28719408	42
T200	Up	32	GO:0010243	response to organonitrogen compound	0.204878	443/20450	7.16284e-29	3.05853e-26	2.71057e-26	816913/817194/817778/818166/818319/818429/818588/818605/820355/820752/820924/821052/821134/821402/823706/823815/824608/825319/825399/827435/827463/828481/828559/828836/829536/829591/829918/832285/832750/833727/834770/835193/838314/838456/838501/838981/839666/842428/843500/844163/844423/28719408	42
T200	Up	32	GO:0035556	intracellular signal transduction	0.165854	495/20450	6.03281e-19	1.71734e-16	1.52196e-16	816579/818166/818319/818429/818605/820355/820752/820924/821134/821575/822462/823706/823815/824761/827435/827463/828053/828481/828606/829591/832285/832750/833727/834210/834444/834770/835193/836843/837276/838501/838981/839666/844423/28719408	34
T200	Up	32	GO:0002679	respiratory burst involved in defense response	0.0926829	121/20450	1.27352e-17	2.17518e-15	1.92771e-15	818166/818319/818429/818605/820355/820752/820924/823815/824608/827435/827463/829591/832285/833727/834770/835193/838981/839666/844423	19
T200	Up	32	GO:0045730	respiratory burst	0.0926829	121/20450	1.27352e-17	2.17518e-15	1.92771e-15	818166/818319/818429/818605/820355/820752/820924/823815/824608/827435/827463/829591/832285/833727/834770/835193/838981/839666/844423	19
T200	Up	32	GO:0009611	response to wounding	0.131707	335/20450	6.23311e-17	8.8718e-15	7.86247e-15	816913/817194/817553/820321/820355/820924/822051/823650/823706/823815/828053/828559/828606/828836/830894/835193/837171/838314/838456/838501/838981/839666/842428/843500/843834/844423/28719408	27
T200	Up	32	GO:0009753	response to jasmonic acid	0.146341	474/20450	7.84944e-16	9.57632e-14	8.48684e-14	816579/817194/817674/818166/818429/820321/820355/820752/820924/821134/823650/823706/827435/828053/828481/828606/830894/832750/834210/835821/837171/837276/838314/838501/839666/842428/843500/843834/844423/28719408	30
T200	Up	32	GO:0008219	cell death	0.141463	496/20450	1.92592e-14	2.05592e-12	1.82203e-12	814657/816579/817194/817746/818166/818429/818605/820355/820924/821134/823706/824608/824761/827435/828053/828481/828606/829536/829918/832750/834210/837276/838456/838501/839808/842450/843834/844074/844423	29
T200	Up	32	GO:0009626	plant-type hypersensitive response	0.126829	400/20450	4.1423e-14	3.75046e-12	3.32377e-12	816579/817194/818166/818429/818605/820355/820924/821134/823706/824608/824761/827435/828053/828481/828606/829536/829918/832750/834210/837276/838456/838501/839808/843834/844074/844423	26
T200	Up	32	GO:0034050	host programmed cell death induced by symbiont	0.126829	401/20450	4.39164e-14	3.75046e-12	3.32377e-12	816579/817194/818166/818429/818605/820355/820924/821134/823706/824608/824761/827435/828053/828481/828606/829536/829918/832750/834210/837276/838456/838501/839808/843834/844074/844423	26
T200	Up	32	GO:0010941	regulation of cell death	0.121951	404/20450	3.98504e-13	3.09384e-11	2.74186e-11	816579/817194/817746/818166/818429/818605/820355/820924/821134/823706/824761/827435/828053/828481/828606/829536/829918/832750/834210/837276/838456/838501/843834/844074/844423	25
T200	Up	32	GO:0010363	regulation of plant-type hypersensitive response	0.117073	371/20450	4.68101e-13	3.33132e-11	2.95232e-11	816579/817194/818166/818429/818605/820355/820924/821134/823706/824761/827435/828053/828481/828606/829536/829918/832750/834210/837276/838456/838501/843834/844074/844423	24
T200	Up	32	GO:0006612	protein targeting to membrane	0.117073	374/20450	5.56847e-13	3.48778e-11	3.09098e-11	816579/817194/818166/818429/818605/820355/820924/821134/823706/824761/827435/828053/828481/828606/829536/829918/832750/834210/837276/838456/838501/843834/844074/844423	24
T200	Up	32	GO:0012501	programmed cell death	0.126829	448/20450	5.71768e-13	3.48778e-11	3.09098e-11	816579/817194/818166/818429/818605/820355/820924/821134/823706/824608/824761/827435/828053/828481/828606/829536/829918/832750/834210/837276/838456/838501/839808/843834/844074/844423	26
T200	Up	32	GO:0072657	protein localization to membrane	0.117073	377/20450	6.61328e-13	3.52984e-11	3.12826e-11	816579/817194/818166/818429/818605/820355/820924/821134/823706/824761/827435/828053/828481/828606/829536/829918/832750/834210/837276/838456/838501/843834/844074/844423	24
T200	Up	32	GO:0090150	establishment of protein localization to membrane	0.117073	377/20450	6.61328e-13	3.52984e-11	3.12826e-11	816579/817194/818166/818429/818605/820355/820924/821134/823706/824761/827435/828053/828481/828606/829536/829918/832750/834210/837276/838456/838501/843834/844074/844423	24
T200	Up	32	GO:0045088	regulation of innate immune response	0.121951	419/20450	8.95632e-13	3.54546e-11	3.1421e-11	816579/817194/818166/818429/818605/820355/820752/820924/821134/823706/824761/827435/828053/828481/828606/829536/829918/832750/834210/837276/838456/838501/843834/844074/844423	25
T200	Up	32	GO:0050776	regulation of immune response	0.121951	421/20450	9.95132e-13	3.54546e-11	3.1421e-11	816579/817194/818166/818429/818605/820355/820752/820924/821134/823706/824761/827435/828053/828481/828606/829536/829918/832750/834210/837276/838456/838501/843834/844074/844423	25
T200	Up	32	GO:0009692	ethylene metabolic process	0.0731707	119/20450	1.02692e-12	3.54546e-11	3.1421e-11	816913/818319/819184/819828/823815/824944/827435/828559/829591/832285/833727/834244/838314/840410/842428	15
T200	Up	32	GO:0009693	ethylene biosynthetic process	0.0731707	119/20450	1.02692e-12	3.54546e-11	3.1421e-11	816913/818319/819184/819828/823815/824944/827435/828559/829591/832285/833727/834244/838314/840410/842428	15
T200	Up	32	GO:0043449	cellular alkene metabolic process	0.0731707	119/20450	1.02692e-12	3.54546e-11	3.1421e-11	816913/818319/819184/819828/823815/824944/827435/828559/829591/832285/833727/834244/838314/840410/842428	15
T200	Up	32	GO:0043450	alkene biosynthetic process	0.0731707	119/20450	1.02692e-12	3.54546e-11	3.1421e-11	816913/818319/819184/819828/823815/824944/827435/828559/829591/832285/833727/834244/838314/840410/842428	15
T200	Up	32	GO:1900673	olefin metabolic process	0.0731707	119/20450	1.02692e-12	3.54546e-11	3.1421e-11	816913/818319/819184/819828/823815/824944/827435/828559/829591/832285/833727/834244/838314/840410/842428	15
T200	Up	32	GO:1900674	olefin biosynthetic process	0.0731707	119/20450	1.02692e-12	3.54546e-11	3.1421e-11	816913/818319/819184/819828/823815/824944/827435/828559/829591/832285/833727/834244/838314/840410/842428	15
T200	Up	32	GO:0080135	regulation of cellular response to stress	0.117073	385/20450	1.0379e-12	3.54546e-11	3.1421e-11	816579/817194/818166/818429/818605/820355/820924/821134/823706/824761/827435/828053/828481/828606/829536/829918/832750/834210/837276/838456/838501/843834/844074/844423	24
T200	Up	32	GO:0002682	regulation of immune system process	0.121951	424/20450	1.16418e-12	3.69174e-11	3.27174e-11	816579/817194/818166/818429/818605/820355/820752/820924/821134/823706/824761/827435/828053/828481/828606/829536/829918/832750/834210/837276/838456/838501/843834/844074/844423	25
T200	Up	32	GO:0043069	negative regulation of programmed cell death	0.0829268	168/20450	1.16718e-12	3.69174e-11	3.27174e-11	818166/818429/818605/820355/823706/824761/828053/828606/829536/829918/832750/834210/837276/838501/843834/844074/844423	17
T200	Up	32	GO:0060548	negative regulation of cell death	0.0829268	172/20450	1.71557e-12	5.23249e-11	4.6372e-11	818166/818429/818605/820355/823706/824761/828053/828606/829536/829918/832750/834210/837276/838501/843834/844074/844423	17
T200	Up	32	GO:0043067	regulation of programmed cell death	0.117073	396/20450	1.89455e-12	5.57913e-11	4.94441e-11	816579/817194/818166/818429/818605/820355/820924/821134/823706/824761/827435/828053/828481/828606/829536/829918/832750/834210/837276/838456/838501/843834/844074/844423	24
T200	Up	32	GO:0002252	immune effector process	0.097561	279/20450	7.15979e-12	2.03815e-10	1.80628e-10	818166/818319/818429/818605/820355/820752/820924/823815/824608/827435/827463/829591/832285/832530/833727/834770/835193/838981/839666/844423	20
T200	Up	32	GO:0050832	defense response to fungus	0.107317	350/20450	8.22409e-12	2.2656e-10	2.00785e-10	816913/817553/818166/818429/818605/820355/820924/821052/821134/823706/828053/828481/829591/829918/832750/834210/835277/837276/838501/839808/842450/844423	22
T200	Up	32	GO:0009751	response to salicylic acid	0.121951	473/20450	1.26717e-11	3.38175e-10	2.99701e-10	816579/817194/817674/818166/818429/818588/818605/820355/820924/821134/823706/827435/828053/828481/828854/829807/832750/833998/834210/836437/837276/838501/842428/843834/844423	25
T200	Up	32	GO:0009612	response to mechanical stimulus	0.0536585	63/20450	3.06511e-11	7.93214e-10	7.02971e-10	816913/817194/820924/823815/828559/828836/835193/838456/838981/839666/844423	11
T200	Up	32	GO:0009863	salicylic acid mediated signaling pathway	0.102439	353/20450	7.03098e-11	1.76602e-09	1.5651e-09	816579/817194/818166/818429/818605/820355/820924/821134/823706/827435/828053/828481/828854/829807/832750/833998/834210/837276/838501/843834/844423	21
T200	Up	32	GO:0071446	cellular response to salicylic acid stimulus	0.102439	355/20450	7.80712e-11	1.90494e-09	1.68822e-09	816579/817194/818166/818429/818605/820355/820924/821134/823706/827435/828053/828481/828854/829807/832750/833998/834210/837276/838501/843834/844423	21
T200	Up	32	GO:0009867	jasmonic acid mediated signaling pathway	0.0926829	286/20450	9.12408e-11	2.10594e-09	1.86635e-09	816579/817194/818166/818429/820355/820752/820924/821134/823706/827435/828053/828481/832750/834210/837171/837276/838501/843834/844423	19
T200	Up	32	GO:0071395	cellular response to jasmonic acid stimulus	0.0926829	286/20450	9.12408e-11	2.10594e-09	1.86635e-09	816579/817194/818166/818429/820355/820752/820924/821134/823706/827435/828053/828481/832750/834210/837171/837276/838501/843834/844423	19
T200	Up	32	GO:0071236	cellular response to antibiotic	0.102439	364/20450	1.23988e-10	2.78646e-09	2.46945e-09	816579/817194/818166/818429/818605/820355/820924/821134/823706/827435/828053/828481/828854/829807/832750/833998/834210/837276/838501/843834/844423	21
T200	Up	32	GO:0035690	cellular response to drug	0.102439	390/20450	4.38059e-10	9.59238e-09	8.50107e-09	816579/817194/818166/818429/818605/820355/820924/821134/823706/827435/828053/828481/828854/829807/832750/833998/834210/837276/838501/843834/844423	21
T200	Up	67	GO:0010200	response to chitin	0.219512	421/20450	9.16211e-27	6.82577e-24	5.56478e-24	816909/816913/817778/818319/818429/818588/818605/820355/820752/820924/823706/823815/824807/825319/825399/827435/827463/827622/828481/828516/828559/828836/829591/829880/829918/832285/832750/834770/835193/836242/836655/838456/839666/842745/843500/844163	36
T200	Up	67	GO:0010243	response to organonitrogen compound	0.219512	443/20450	5.40825e-26	2.01457e-23	1.6424e-23	816909/816913/817778/818319/818429/818588/818605/820355/820752/820924/823706/823815/824807/825319/825399/827435/827463/827622/828481/828516/828559/828836/829591/829880/829918/832285/832750/834770/835193/836242/836655/838456/839666/842745/843500/844163	36
T200	Up	67	GO:0035556	intracellular signal transduction	0.176829	495/20450	4.07075e-17	1.0109e-14	8.24148e-15	815147/818319/818429/818605/820355/820429/820752/820924/823706/823815/824807/827435/827463/827622/828053/828481/829591/832285/832750/834210/834444/834770/835193/836211/836242/836655/837276/839666/839748	29
T200	Up	67	GO:0002679	respiratory burst involved in defense response	0.103659	121/20450	1.08784e-16	1.62088e-14	1.32144e-14	818319/818429/818605/820355/820752/820924/823815/824807/827435/827463/827622/829591/832285/834770/835193/836242/839666	17
T200	Up	67	GO:0045730	respiratory burst	0.103659	121/20450	1.08784e-16	1.62088e-14	1.32144e-14	818319/818429/818605/820355/820752/820924/823815/824807/827435/827463/827622/829591/832285/834770/835193/836242/839666	17
T200	Up	67	GO:0045088	regulation of innate immune response	0.152439	419/20450	4.88468e-15	5.79893e-13	4.72764e-13	815147/818429/818605/819244/820355/820752/820924/823706/824807/827435/828053/828481/829466/829623/829918/830934/832750/833550/834210/836211/836242/837276/838456/839748/844074	25
T200	Up	67	GO:0050776	regulation of immune response	0.152439	421/20450	5.44866e-15	5.79893e-13	4.72764e-13	815147/818429/818605/819244/820355/820752/820924/823706/824807/827435/828053/828481/829466/829623/829918/830934/832750/833550/834210/836211/836242/837276/838456/839748/844074	25
T200	Up	67	GO:0002682	regulation of immune system process	0.152439	424/20450	6.41185e-15	5.97104e-13	4.86795e-13	815147/818429/818605/819244/820355/820752/820924/823706/824807/827435/828053/828481/829466/829623/829918/830934/832750/833550/834210/836211/836242/837276/838456/839748/844074	25
T200	Up	67	GO:0009626	plant-type hypersensitive response	0.146341	400/20450	1.59468e-14	1.25524e-12	1.02334e-12	815147/818429/818605/820355/820924/823706/824807/827435/828053/828481/829466/829623/829918/830934/832750/833550/834210/836211/836242/837276/838456/839748/839808/844074	24
T200	Up	67	GO:0034050	host programmed cell death induced by symbiont	0.146341	401/20450	1.68488e-14	1.25524e-12	1.02334e-12	815147/818429/818605/820355/820924/823706/824807/827435/828053/828481/829466/829623/829918/830934/832750/833550/834210/836211/836242/837276/838456/839748/839808/844074	24
T200	Up	67	GO:0010941	regulation of cell death	0.146341	404/20450	1.98541e-14	1.34466e-12	1.09625e-12	815147/817746/818429/818605/820355/820924/823706/824807/827435/828053/828481/829466/829623/829918/830934/832750/833550/834210/836211/836242/837276/838456/839748/844074	24
T200	Up	67	GO:0008219	cell death	0.158537	496/20450	2.81046e-14	1.68946e-12	1.37735e-12	814657/815147/817746/818429/818605/820355/820924/823706/824807/827435/828053/828481/829466/829623/829918/830934/832750/833550/834210/836211/836242/837276/838456/839748/839808/844074	26
T200	Up	67	GO:0010363	regulation of plant-type hypersensitive response	0.140244	371/20450	2.94806e-14	1.68946e-12	1.37735e-12	815147/818429/818605/820355/820924/823706/824807/827435/828053/828481/829466/829623/829918/830934/832750/833550/834210/836211/836242/837276/838456/839748/844074	23
T200	Up	67	GO:0009611	response to wounding	0.134146	335/20450	3.45448e-14	1.73689e-12	1.41602e-12	815147/816913/819244/820355/820429/820924/821214/822051/823706/823815/828053/828540/828559/828836/829567/829623/835193/836242/838456/839666/839748/843500	22
T200	Up	67	GO:0006612	protein targeting to membrane	0.140244	374/20450	3.49709e-14	1.73689e-12	1.41602e-12	815147/818429/818605/820355/820924/823706/824807/827435/828053/828481/829466/829623/829918/830934/832750/833550/834210/836211/836242/837276/838456/839748/844074	23
T200	Up	67	GO:0072657	protein localization to membrane	0.140244	377/20450	4.14185e-14	1.81511e-12	1.47978e-12	815147/818429/818605/820355/820924/823706/824807/827435/828053/828481/829466/829623/829918/830934/832750/833550/834210/836211/836242/837276/838456/839748/844074	23
T200	Up	67	GO:0090150	establishment of protein localization to membrane	0.140244	377/20450	4.14185e-14	1.81511e-12	1.47978e-12	815147/818429/818605/820355/820924/823706/824807/827435/828053/828481/829466/829623/829918/830934/832750/833550/834210/836211/836242/837276/838456/839748/844074	23
T200	Up	67	GO:0080135	regulation of cellular response to stress	0.140244	385/20450	6.45508e-14	2.67169e-12	2.17812e-12	815147/818429/818605/820355/820924/823706/824807/827435/828053/828481/829466/829623/829918/830934/832750/833550/834210/836211/836242/837276/838456/839748/844074	23
T200	Up	67	GO:0043067	regulation of programmed cell death	0.140244	396/20450	1.16797e-13	4.57967e-12	3.73362e-12	815147/818429/818605/820355/820924/823706/824807/827435/828053/828481/829466/829623/829918/830934/832750/833550/834210/836211/836242/837276/838456/839748/844074	23
T200	Up	67	GO:0012501	programmed cell death	0.146341	448/20450	1.89528e-13	7.05992e-12	5.75567e-12	815147/818429/818605/820355/820924/823706/824807/827435/828053/828481/829466/829623/829918/830934/832750/833550/834210/836211/836242/837276/838456/839748/839808/844074	24
T200	Up	67	GO:0009692	ethylene metabolic process	0.0853659	119/20450	7.41787e-13	2.1255e-11	1.73284e-11	816913/818319/819828/823815/824944/827388/827435/828540/828559/829591/832285/834244/836655/839748	14
T200	Up	67	GO:0009693	ethylene biosynthetic process	0.0853659	119/20450	7.41787e-13	2.1255e-11	1.73284e-11	816913/818319/819828/823815/824944/827388/827435/828540/828559/829591/832285/834244/836655/839748	14
T200	Up	67	GO:0043449	cellular alkene metabolic process	0.0853659	119/20450	7.41787e-13	2.1255e-11	1.73284e-11	816913/818319/819828/823815/824944/827388/827435/828540/828559/829591/832285/834244/836655/839748	14
T200	Up	67	GO:0043450	alkene biosynthetic process	0.0853659	119/20450	7.41787e-13	2.1255e-11	1.73284e-11	816913/818319/819828/823815/824944/827388/827435/828540/828559/829591/832285/834244/836655/839748	14
T200	Up	67	GO:1900673	olefin metabolic process	0.0853659	119/20450	7.41787e-13	2.1255e-11	1.73284e-11	816913/818319/819828/823815/824944/827388/827435/828540/828559/829591/832285/834244/836655/839748	14
T200	Up	67	GO:1900674	olefin biosynthetic process	0.0853659	119/20450	7.41787e-13	2.1255e-11	1.73284e-11	816913/818319/819828/823815/824944/827388/827435/828540/828559/829591/832285/834244/836655/839748	14
T200	Up	67	GO:0002252	immune effector process	0.115854	279/20450	1.13239e-12	3.12455e-11	2.54732e-11	818319/818429/818605/819244/820355/820752/820924/823815/824807/827435/827463/827622/829591/832285/832530/834770/835193/836242/839666	19
T200	Up	67	GO:0009751	response to salicylic acid	0.140244	473/20450	4.61286e-12	1.22735e-10	1.00061e-10	815147/818429/818588/818605/820355/820924/823706/824807/827435/828053/828481/829623/829807/829880/832750/833550/833998/834210/836211/836242/836437/837276/839748	23
T200	Up	67	GO:0035690	cellular response to drug	0.128049	390/20450	6.2522e-12	1.58504e-10	1.29222e-10	815147/816909/818429/818605/820355/820924/823706/824807/827435/828053/828481/829623/829807/832750/833550/833998/834210/836211/836242/837276/839748	21
T200	Up	67	GO:0043069	negative regulation of programmed cell death	0.0914634	168/20450	6.38272e-12	1.58504e-10	1.29222e-10	815147/818429/818605/820355/823706/824807/828053/829918/830934/832750/834210/836242/837276/839748/844074	15
T200	Up	67	GO:0050832	defense response to fungus	0.121951	350/20450	7.03909e-12	1.69165e-10	1.37914e-10	815147/816913/818289/818429/818605/820355/820429/820924/823706/824807/828053/828481/829591/829918/832750/834210/836242/837276/839748/839808	20
T200	Up	67	GO:0009863	salicylic acid mediated signaling pathway	0.121951	353/20450	8.21994e-12	1.9137e-10	1.56017e-10	815147/818429/818605/820355/820924/823706/824807/827435/828053/828481/829623/829807/832750/833550/833998/834210/836211/836242/837276/839748	20
T200	Up	67	GO:0060548	negative regulation of cell death	0.0914634	172/20450	8.97515e-12	1.99562e-10	1.62695e-10	815147/818429/818605/820355/823706/824807/828053/829918/830934/832750/834210/836242/837276/839748/844074	15
T200	Up	67	GO:0071446	cellular response to salicylic acid stimulus	0.121951	355/20450	9.10753e-12	1.99562e-10	1.62695e-10	815147/818429/818605/820355/820924/823706/824807/827435/828053/828481/829623/829807/832750/833550/833998/834210/836211/836242/837276/839748	20
T200	Up	67	GO:0071236	cellular response to antibiotic	0.121951	364/20450	1.43295e-11	3.05015e-10	2.48666e-10	815147/818429/818605/820355/820924/823706/824807/827435/828053/828481/829623/829807/832750/833550/833998/834210/836211/836242/837276/839748	20
T200	Up	67	GO:0009867	jasmonic acid mediated signaling pathway	0.109756	286/20450	1.71871e-11	3.46064e-10	2.82132e-10	815147/818429/819244/820355/820752/820924/823706/824807/827435/828053/828481/829623/832750/834210/836211/836242/837276/839748	18
T200	Up	67	GO:0071395	cellular response to jasmonic acid stimulus	0.109756	286/20450	1.71871e-11	3.46064e-10	2.82132e-10	815147/818429/819244/820355/820752/820924/823706/824807/827435/828053/828481/829623/832750/834210/836211/836242/837276/839748	18
T200	Up	67	GO:0009862	systemic acquired resistance, salicylic acid mediated signaling pathway	0.103659	251/20450	2.03481e-11	3.98929e-10	3.25231e-10	815147/818429/820355/820924/823706/824807/828053/828481/829807/832750/833550/833998/834210/836211/836242/837276/839748	17
T200	Up	67	GO:0009753	response to jasmonic acid	0.134146	474/20450	3.45049e-11	6.59132e-10	5.37363e-10	815147/818429/819244/820355/820752/820924/823706/824807/827435/828053/828481/828540/829623/829880/832750/834210/836211/836242/837276/839666/839748/843500	22
T200	Up	67	GO:0071407	cellular response to organic cyclic compound	0.121951	393/20450	5.67088e-11	1.0562e-09	8.61079e-10	815147/818429/818605/820355/820924/823706/824807/827435/828053/828481/829623/829807/832750/833550/833998/834210/836211/836242/837276/839748	20
T200	Up	67	GO:0031348	negative regulation of defense response	0.103659	277/20450	9.59086e-11	1.74273e-09	1.42078e-09	815147/818429/819244/820355/820924/823706/824807/828053/828481/829466/832750/833550/834210/836211/836242/837276/839748	17
T200	Up	67	GO:0000165	MAPK cascade	0.0914634	221/20450	3.17309e-10	5.49756e-09	4.48194e-09	815147/818429/820355/820924/823706/824807/828053/828481/832285/832750/834210/836211/836242/837276/839748	15
T200	Up	67	GO:0023014	signal transduction by protein phosphorylation	0.0914634	221/20450	3.17309e-10	5.49756e-09	4.48194e-09	815147/818429/820355/820924/823706/824807/828053/828481/832285/832750/834210/836211/836242/837276/839748	15
TME3	Down	12	GO:0010200	response to chitin	0.194969	421/20450	1.47061e-21	1.17061e-18	9.79893e-19	816913/818166/818409/818588/818605/819260/820355/820924/821402/823815/824608/825399/826812/827435/828516/828559/829536/829880/831854/832285/834836/836074/837428/838456/838501/839265/839666/843584/844163/28719408/28720712	31
TME3	Down	12	GO:0010243	response to organonitrogen compound	0.194969	443/20450	6.59332e-21	2.62414e-18	2.19662e-18	816913/818166/818409/818588/818605/819260/820355/820924/821402/823815/824608/825399/826812/827435/828516/828559/829536/829880/831854/832285/834836/836074/837428/838456/838501/839265/839666/843584/844163/28719408/28720712	31
TME3	Down	12	GO:0009611	response to wounding	0.125786	335/20450	1.76353e-12	4.67924e-10	3.9169e-10	816913/817553/819260/820355/820924/823815/826618/828540/828559/837071/837428/838456/838501/839265/839666/839748/843584/843982/844002/28719408	20
TME3	Down	12	GO:0008219	cell death	0.144654	496/20450	6.28392e-12	1.2505e-09	1.04677e-09	814657/817746/818166/818409/818605/818705/819260/819889/820355/820771/820924/821356/824608/827435/828229/829536/837276/837428/838456/838501/839748/839808/844074	23
TME3	Up	32	GO:0009753	response to jasmonic acid	0.291262	474/20450	6.33375e-25	3.96493e-22	2.97353e-22	815160/817295/817586/821055/821904/823650/824807/825297/825476/827377/828053/828849/829880/830443/832214/832524/834210/834273/835821/836464/838122/838314/838501/838639/839265/839545/839893/840158/842428/844423	30
TME3	Up	32	GO:0009694	jasmonic acid metabolic process	0.174757	158/20450	1.11821e-19	3.5e-17	2.62486e-17	815160/817586/821055/821904/823650/829022/830443/834273/835821/836464/838314/838501/838639/839265/839545/839893/840158/844423	18
TME3	Up	32	GO:0009611	response to wounding	0.213592	335/20450	1.19284e-18	2.48907e-16	1.8667e-16	815160/817586/821055/821904/823650/827377/828053/828849/830443/832214/834273/836464/838314/838501/838639/839265/839893/840158/842428/843685/843982/844423	22
TME3	Up	32	GO:0009695	jasmonic acid biosynthetic process	0.145631	135/20450	2.21832e-16	3.47167e-14	2.60361e-14	815160/817586/821055/821904/823650/829022/830443/834273/838314/838501/838639/839265/839893/840158/844423	15
TME3	Up	32	GO:0009867	jasmonic acid mediated signaling pathway	0.165049	286/20450	7.27271e-14	7.58786e-12	5.69058e-12	815160/817295/821055/821904/824807/825476/828053/830443/832214/832524/834210/834273/838122/838501/839893/840158/844423	17
TME3	Up	32	GO:0071395	cellular response to jasmonic acid stimulus	0.165049	286/20450	7.27271e-14	7.58786e-12	5.69058e-12	815160/817295/821055/821904/824807/825476/828053/830443/832214/832524/834210/834273/838122/838501/839893/840158/844423	17
TME3	Up	32	GO:0009738	abscisic acid-activated signaling pathway	0.15534	248/20450	1.18384e-13	1.05869e-11	7.93976e-12	815160/817586/821904/824761/825476/827464/828053/828849/832662/834210/836843/838122/838501/839265/840158/844423	16
TME3	Up	32	GO:0009723	response to ethylene	0.174757	353/20450	1.74179e-13	1.36295e-11	1.02216e-11	815160/817087/817586/821891/821904/824761/825476/827464/828849/829880/829891/832662/836843/838122/838501/839143/843685/844423	18
TME3	Up	32	GO:0071215	cellular response to abscisic acid stimulus	0.15534	263/20450	2.93426e-13	1.73776e-11	1.30325e-11	815160/817586/821904/824761/825476/827464/828053/828849/832662/834210/836843/838122/838501/839265/840158/844423	16
TME3	Up	32	GO:0097306	cellular response to alcohol	0.15534	263/20450	2.93426e-13	1.73776e-11	1.30325e-11	815160/817586/821904/824761/825476/827464/828053/828849/832662/834210/836843/838122/838501/839265/840158/844423	16
TME3	Up	32	GO:0010200	response to chitin	0.184466	421/20450	3.05358e-13	1.73776e-11	1.30325e-11	814962/818588/821904/824608/824807/827464/829880/832524/832662/834273/838122/838314/838501/838639/839265/840158/842428/843685/844423	19
TME3	Up	32	GO:0071396	cellular response to lipid	0.174757	381/20450	6.35893e-13	3.31724e-11	2.48779e-11	815160/817586/819014/821904/824761/825476/827464/828053/828849/830708/832662/834210/836843/838122/838501/839265/840158/844423	18
TME3	Up	32	GO:0010243	response to organonitrogen compound	0.184466	443/20450	7.51944e-13	3.6209e-11	2.71552e-11	814962/818588/821904/824608/824807/827464/829880/832524/832662/834273/838122/838314/838501/838639/839265/840158/842428/843685/844423	19
TME3	Up	32	GO:0035556	intracellular signal transduction	0.184466	495/20450	5.25144e-12	2.34815e-10	1.76101e-10	817087/817586/821891/821904/824761/824807/825476/827464/828053/832524/832662/834210/834273/836843/838122/838501/839143/843685/844423	19
TME3	Up	32	GO:0009626	plant-type hypersensitive response	0.165049	400/20450	1.585e-11	6.44979e-10	4.83707e-10	817295/824608/824761/824807/825476/828053/829466/832214/832524/832662/833550/834210/834273/838122/838501/840158/844423	17
TME3	Up	32	GO:0034050	host programmed cell death induced by symbiont	0.165049	401/20450	1.64851e-11	6.44979e-10	4.83707e-10	817295/824608/824761/824807/825476/828053/829466/832214/832524/832662/833550/834210/834273/838122/838501/840158/844423	17
TME3	Up	32	GO:0010941	regulation of cell death	0.165049	404/20450	1.85348e-11	6.82518e-10	5.1186e-10	817295/817746/824761/824807/825476/828053/829466/832214/832524/832662/833550/834210/834273/838122/838501/840158/844423	17
TME3	Up	32	GO:0008219	cell death	0.174757	496/20450	5.09156e-11	1.76035e-09	1.32019e-09	817295/817746/824608/824761/824807/825476/828053/829466/832214/832524/832662/833550/834210/834273/838122/838501/840158/844423	18
TME3	Up	32	GO:0010363	regulation of plant-type hypersensitive response	0.15534	371/20450	5.34291e-11	1.76035e-09	1.32019e-09	817295/824761/824807/825476/828053/829466/832214/832524/832662/833550/834210/834273/838122/838501/840158/844423	16
TME3	Up	32	GO:0006612	protein targeting to membrane	0.15534	374/20450	6.02019e-11	1.88432e-09	1.41316e-09	817295/824761/824807/825476/828053/829466/832214/832524/832662/833550/834210/834273/838122/838501/840158/844423	16
TME3	Up	32	GO:0072657	protein localization to membrane	0.15534	377/20450	6.77605e-11	1.92809e-09	1.44599e-09	817295/824761/824807/825476/828053/829466/832214/832524/832662/833550/834210/834273/838122/838501/840158/844423	16
TME3	Up	32	GO:0090150	establishment of protein localization to membrane	0.15534	377/20450	6.77605e-11	1.92809e-09	1.44599e-09	817295/824761/824807/825476/828053/829466/832214/832524/832662/833550/834210/834273/838122/838501/840158/844423	16
TME3	Up	32	GO:0080135	regulation of cellular response to stress	0.15534	385/20450	9.24124e-11	2.4277e-09	1.82067e-09	817295/824761/824807/825476/828053/829466/832214/832524/832662/833550/834210/834273/838122/838501/840158/844423	16
TME3	Up	32	GO:0012501	programmed cell death	0.165049	448/20450	9.30747e-11	2.4277e-09	1.82067e-09	817295/824608/824761/824807/825476/828053/829466/832214/832524/832662/833550/834210/834273/838122/838501/840158/844423	17
TME3	Up	32	GO:0043067	regulation of programmed cell death	0.15534	396/20450	1.39939e-10	3.50407e-09	2.62791e-09	817295/824761/824807/825476/828053/829466/832214/832524/832662/833550/834210/834273/838122/838501/840158/844423	16
TME3	Up	32	GO:0045088	regulation of innate immune response	0.15534	419/20450	3.19932e-10	7.70297e-09	5.7769e-09	817295/824761/824807/825476/828053/829466/832214/832524/832662/833550/834210/834273/838122/838501/840158/844423	16
TME3	Up	32	GO:0050776	regulation of immune response	0.15534	421/20450	3.42942e-10	7.95117e-09	5.96305e-09	817295/824761/824807/825476/828053/829466/832214/832524/832662/833550/834210/834273/838122/838501/840158/844423	16
TME3	Up	32	GO:0002682	regulation of immune system process	0.15534	424/20450	3.80331e-10	8.50311e-09	6.37697e-09	817295/824761/824807/825476/828053/829466/832214/832524/832662/833550/834210/834273/838122/838501/840158/844423	16

## Sheet: T200_12
T200 dpi No enriched (adjusted p value <1E-08) biological processes
Plant	Expression	Timepoint	ID	Description	Ratio	BgRatio	pvalue	p.adjust	qvalue	geneID	Count
T200	Down	12	GO:0048509	regulation of meristem development	0.0941176	224/20450	4.26465e-06	0.00196729	0.00188661	815145/818649/818884/829788/830022/830915/831124/836699	8
T200	Down	12	GO:0010075	regulation of meristem growth	0.0823529	171/20450	7.21027e-06	0.00196729	0.00188661	815145/818649/818884/829788/830022/830915/836699	7
T200	Down	12	GO:0035266	meristem growth	0.0823529	179/20450	9.72303e-06	0.00196729	0.00188661	815145/818649/818884/829788/830022/830915/836699	7
T200	Down	12	GO:0009414	response to water deprivation	0.105882	418/20450	5.96752e-05	0.00837822	0.00803461	815949/817608/827612/827956/838122/841122/842797/843296/844174	9
T200	Down	12	GO:0009415	response to water	0.105882	426/20450	6.90134e-05	0.00837822	0.00803461	815949/817608/827612/827956/838122/841122/842797/843296/844174	9
T200	Down	12	GO:0048638	regulation of developmental growth	0.0823529	277/20450	0.000155491	0.0157305	0.0150853	815145/818649/818884/829788/830022/830915/836699	7
T200	Down	12	GO:0010073	meristem maintenance	0.0823529	285/20450	0.000185195	0.0160591	0.0154004	815145/818649/818884/829788/830022/830915/836699	7
T200	Down	12	GO:0040008	regulation of growth	0.0823529	306/20450	0.000285519	0.0216637	0.0207752	815145/818649/818884/829788/830022/830915/836699	7
T200	Up	12	GO:0010200	response to chitin	0.123596	421/20450	6.13322e-06	0.00245172	0.00209589	818429/818588/820924/823815/824011/825319/828481/829880/835193/838504/838981	11
T200	Up	12	GO:0010243	response to organonitrogen compound	0.123596	443/20450	9.90593e-06	0.00245172	0.00209589	818429/818588/820924/823815/824011/825319/828481/829880/835193/838504/838981	11
T200	Up	12	GO:0009611	response to wounding	0.101124	335/20450	3.62197e-05	0.00597626	0.00510889	820321/820924/823815/824011/827912/829567/835193/838981/839748	9
T200	Up	12	GO:0009612	response to mechanical stimulus	0.0449438	63/20450	0.000247266	0.0252721	0.0216042	820924/823815/835193/838981	4
T200	Up	12	GO:0002679	respiratory burst involved in defense response	0.0561798	121/20450	0.000306328	0.0252721	0.0216042	818429/820924/823815/835193/838981	5
T200	Up	12	GO:0045730	respiratory burst	0.0561798	121/20450	0.000306328	0.0252721	0.0216042	818429/820924/823815/835193/838981	5

## Sheet: T200_32
T200 at 32 dpi. Enriched (adjusted p value <1E-08) GOs highlighted in green are represented in the heat map (figure 8)
Plant	Expression	Timepoint	ID	Description	Ratio	BgRatio	pvalue	p.adjust	qvalue	geneID	Count
T200	Up	32	GO:0010200	response to chitin	0.204878	421/20450	9.0144e-30	7.6983e-27	6.82248e-27	816913/817194/817778/818166/818319/818429/818588/818605/820355/820752/820924/821052/821134/821402/823706/823815/824608/825319/825399/827435/827463/828481/828559/828836/829536/829591/829918/832285/832750/833727/834770/835193/838314/838456/838501/838981/839666/842428/843500/844163/844423/28719408	42
T200	Up	32	GO:0010243	response to organonitrogen compound	0.204878	443/20450	7.16284e-29	3.05853e-26	2.71057e-26	816913/817194/817778/818166/818319/818429/818588/818605/820355/820752/820924/821052/821134/821402/823706/823815/824608/825319/825399/827435/827463/828481/828559/828836/829536/829591/829918/832285/832750/833727/834770/835193/838314/838456/838501/838981/839666/842428/843500/844163/844423/28719408	42
T200	Up	32	GO:0035556	intracellular signal transduction	0.165854	495/20450	6.03281e-19	1.71734e-16	1.52196e-16	816579/818166/818319/818429/818605/820355/820752/820924/821134/821575/822462/823706/823815/824761/827435/827463/828053/828481/828606/829591/832285/832750/833727/834210/834444/834770/835193/836843/837276/838501/838981/839666/844423/28719408	34
T200	Up	32	GO:0002679	respiratory burst involved in defense response	0.0926829	121/20450	1.27352e-17	2.17518e-15	1.92771e-15	818166/818319/818429/818605/820355/820752/820924/823815/824608/827435/827463/829591/832285/833727/834770/835193/838981/839666/844423	19
T200	Up	32	GO:0045730	respiratory burst	0.0926829	121/20450	1.27352e-17	2.17518e-15	1.92771e-15	818166/818319/818429/818605/820355/820752/820924/823815/824608/827435/827463/829591/832285/833727/834770/835193/838981/839666/844423	19
T200	Up	32	GO:0009611	response to wounding	0.131707	335/20450	6.23311e-17	8.8718e-15	7.86247e-15	816913/817194/817553/820321/820355/820924/822051/823650/823706/823815/828053/828559/828606/828836/830894/835193/837171/838314/838456/838501/838981/839666/842428/843500/843834/844423/28719408	27
T200	Up	32	GO:0009753	response to jasmonic acid	0.146341	474/20450	7.84944e-16	9.57632e-14	8.48684e-14	816579/817194/817674/818166/818429/820321/820355/820752/820924/821134/823650/823706/827435/828053/828481/828606/830894/832750/834210/835821/837171/837276/838314/838501/839666/842428/843500/843834/844423/28719408	30
T200	Up	32	GO:0008219	cell death	0.141463	496/20450	1.92592e-14	2.05592e-12	1.82203e-12	814657/816579/817194/817746/818166/818429/818605/820355/820924/821134/823706/824608/824761/827435/828053/828481/828606/829536/829918/832750/834210/837276/838456/838501/839808/842450/843834/844074/844423	29
T200	Up	32	GO:0009626	plant-type hypersensitive response	0.126829	400/20450	4.1423e-14	3.75046e-12	3.32377e-12	816579/817194/818166/818429/818605/820355/820924/821134/823706/824608/824761/827435/828053/828481/828606/829536/829918/832750/834210/837276/838456/838501/839808/843834/844074/844423	26
T200	Up	32	GO:0034050	host programmed cell death induced by symbiont	0.126829	401/20450	4.39164e-14	3.75046e-12	3.32377e-12	816579/817194/818166/818429/818605/820355/820924/821134/823706/824608/824761/827435/828053/828481/828606/829536/829918/832750/834210/837276/838456/838501/839808/843834/844074/844423	26
T200	Up	32	GO:0010941	regulation of cell death	0.121951	404/20450	3.98504e-13	3.09384e-11	2.74186e-11	816579/817194/817746/818166/818429/818605/820355/820924/821134/823706/824761/827435/828053/828481/828606/829536/829918/832750/834210/837276/838456/838501/843834/844074/844423	25
T200	Up	32	GO:0010363	regulation of plant-type hypersensitive response	0.117073	371/20450	4.68101e-13	3.33132e-11	2.95232e-11	816579/817194/818166/818429/818605/820355/820924/821134/823706/824761/827435/828053/828481/828606/829536/829918/832750/834210/837276/838456/838501/843834/844074/844423	24
T200	Up	32	GO:0006612	protein targeting to membrane	0.117073	374/20450	5.56847e-13	3.48778e-11	3.09098e-11	816579/817194/818166/818429/818605/820355/820924/821134/823706/824761/827435/828053/828481/828606/829536/829918/832750/834210/837276/838456/838501/843834/844074/844423	24
T200	Up	32	GO:0012501	programmed cell death	0.126829	448/20450	5.71768e-13	3.48778e-11	3.09098e-11	816579/817194/818166/818429/818605/820355/820924/821134/823706/824608/824761/827435/828053/828481/828606/829536/829918/832750/834210/837276/838456/838501/839808/843834/844074/844423	26
T200	Up	32	GO:0072657	protein localization to membrane	0.117073	377/20450	6.61328e-13	3.52984e-11	3.12826e-11	816579/817194/818166/818429/818605/820355/820924/821134/823706/824761/827435/828053/828481/828606/829536/829918/832750/834210/837276/838456/838501/843834/844074/844423	24
T200	Up	32	GO:0090150	establishment of protein localization to membrane	0.117073	377/20450	6.61328e-13	3.52984e-11	3.12826e-11	816579/817194/818166/818429/818605/820355/820924/821134/823706/824761/827435/828053/828481/828606/829536/829918/832750/834210/837276/838456/838501/843834/844074/844423	24
T200	Up	32	GO:0045088	regulation of innate immune response	0.121951	419/20450	8.95632e-13	3.54546e-11	3.1421e-11	816579/817194/818166/818429/818605/820355/820752/820924/821134/823706/824761/827435/828053/828481/828606/829536/829918/832750/834210/837276/838456/838501/843834/844074/844423	25
T200	Up	32	GO:0050776	regulation of immune response	0.121951	421/20450	9.95132e-13	3.54546e-11	3.1421e-11	816579/817194/818166/818429/818605/820355/820752/820924/821134/823706/824761/827435/828053/828481/828606/829536/829918/832750/834210/837276/838456/838501/843834/844074/844423	25
T200	Up	32	GO:0009692	ethylene metabolic process	0.0731707	119/20450	1.02692e-12	3.54546e-11	3.1421e-11	816913/818319/819184/819828/823815/824944/827435/828559/829591/832285/833727/834244/838314/840410/842428	15
T200	Up	32	GO:0009693	ethylene biosynthetic process	0.0731707	119/20450	1.02692e-12	3.54546e-11	3.1421e-11	816913/818319/819184/819828/823815/824944/827435/828559/829591/832285/833727/834244/838314/840410/842428	15
T200	Up	32	GO:0043449	cellular alkene metabolic process	0.0731707	119/20450	1.02692e-12	3.54546e-11	3.1421e-11	816913/818319/819184/819828/823815/824944/827435/828559/829591/832285/833727/834244/838314/840410/842428	15
T200	Up	32	GO:0043450	alkene biosynthetic process	0.0731707	119/20450	1.02692e-12	3.54546e-11	3.1421e-11	816913/818319/819184/819828/823815/824944/827435/828559/829591/832285/833727/834244/838314/840410/842428	15
T200	Up	32	GO:1900673	olefin metabolic process	0.0731707	119/20450	1.02692e-12	3.54546e-11	3.1421e-11	816913/818319/819184/819828/823815/824944/827435/828559/829591/832285/833727/834244/838314/840410/842428	15
T200	Up	32	GO:1900674	olefin biosynthetic process	0.0731707	119/20450	1.02692e-12	3.54546e-11	3.1421e-11	816913/818319/819184/819828/823815/824944/827435/828559/829591/832285/833727/834244/838314/840410/842428	15
T200	Up	32	GO:0080135	regulation of cellular response to stress	0.117073	385/20450	1.0379e-12	3.54546e-11	3.1421e-11	816579/817194/818166/818429/818605/820355/820924/821134/823706/824761/827435/828053/828481/828606/829536/829918/832750/834210/837276/838456/838501/843834/844074/844423	24
T200	Up	32	GO:0002682	regulation of immune system process	0.121951	424/20450	1.16418e-12	3.69174e-11	3.27174e-11	816579/817194/818166/818429/818605/820355/820752/820924/821134/823706/824761/827435/828053/828481/828606/829536/829918/832750/834210/837276/838456/838501/843834/844074/844423	25
T200	Up	32	GO:0043069	negative regulation of programmed cell death	0.0829268	168/20450	1.16718e-12	3.69174e-11	3.27174e-11	818166/818429/818605/820355/823706/824761/828053/828606/829536/829918/832750/834210/837276/838501/843834/844074/844423	17
T200	Up	32	GO:0060548	negative regulation of cell death	0.0829268	172/20450	1.71557e-12	5.23249e-11	4.6372e-11	818166/818429/818605/820355/823706/824761/828053/828606/829536/829918/832750/834210/837276/838501/843834/844074/844423	17
T200	Up	32	GO:0043067	regulation of programmed cell death	0.117073	396/20450	1.89455e-12	5.57913e-11	4.94441e-11	816579/817194/818166/818429/818605/820355/820924/821134/823706/824761/827435/828053/828481/828606/829536/829918/832750/834210/837276/838456/838501/843834/844074/844423	24
T200	Up	32	GO:0002252	immune effector process	0.097561	279/20450	7.15979e-12	2.03815e-10	1.80628e-10	818166/818319/818429/818605/820355/820752/820924/823815/824608/827435/827463/829591/832285/832530/833727/834770/835193/838981/839666/844423	20
T200	Up	32	GO:0050832	defense response to fungus	0.107317	350/20450	8.22409e-12	2.2656e-10	2.00785e-10	816913/817553/818166/818429/818605/820355/820924/821052/821134/823706/828053/828481/829591/829918/832750/834210/835277/837276/838501/839808/842450/844423	22
T200	Up	32	GO:0009751	response to salicylic acid	0.121951	473/20450	1.26717e-11	3.38175e-10	2.99701e-10	816579/817194/817674/818166/818429/818588/818605/820355/820924/821134/823706/827435/828053/828481/828854/829807/832750/833998/834210/836437/837276/838501/842428/843834/844423	25
T200	Up	32	GO:0009612	response to mechanical stimulus	0.0536585	63/20450	3.06511e-11	7.93214e-10	7.02971e-10	816913/817194/820924/823815/828559/828836/835193/838456/838981/839666/844423	11
T200	Up	32	GO:0009863	salicylic acid mediated signaling pathway	0.102439	353/20450	7.03098e-11	1.76602e-09	1.5651e-09	816579/817194/818166/818429/818605/820355/820924/821134/823706/827435/828053/828481/828854/829807/832750/833998/834210/837276/838501/843834/844423	21
T200	Up	32	GO:0071446	cellular response to salicylic acid stimulus	0.102439	355/20450	7.80712e-11	1.90494e-09	1.68822e-09	816579/817194/818166/818429/818605/820355/820924/821134/823706/827435/828053/828481/828854/829807/832750/833998/834210/837276/838501/843834/844423	21
T200	Up	32	GO:0009867	jasmonic acid mediated signaling pathway	0.0926829	286/20450	9.12408e-11	2.10594e-09	1.86635e-09	816579/817194/818166/818429/820355/820752/820924/821134/823706/827435/828053/828481/832750/834210/837171/837276/838501/843834/844423	19
T200	Up	32	GO:0071395	cellular response to jasmonic acid stimulus	0.0926829	286/20450	9.12408e-11	2.10594e-09	1.86635e-09	816579/817194/818166/818429/820355/820752/820924/821134/823706/827435/828053/828481/832750/834210/837171/837276/838501/843834/844423	19
T200	Up	32	GO:0071236	cellular response to antibiotic	0.102439	364/20450	1.23988e-10	2.78646e-09	2.46945e-09	816579/817194/818166/818429/818605/820355/820924/821134/823706/827435/828053/828481/828854/829807/832750/833998/834210/837276/838501/843834/844423	21
T200	Up	32	GO:0035690	cellular response to drug	0.102439	390/20450	4.38059e-10	9.59238e-09	8.50107e-09	816579/817194/818166/818429/818605/820355/820924/821134/823706/827435/828053/828481/828854/829807/832750/833998/834210/837276/838501/843834/844423	21
T200	Down	32	GO:0009718	anthocyanin-containing compound biosynthetic process	0.0510204	60/20450	2.584e-10	9.89514e-08	9.03495e-08	816620/819083/821164/824287/824678/828387/830693/831241/834291/842814	10
T200	Down	32	GO:0009813	flavonoid biosynthetic process	0.0816327	217/20450	3.33544e-10	9.89514e-08	9.03495e-08	816620/816695/818280/819083/821164/824287/824493/824678/827220/828387/830693/831241/832524/834291/835418/842814	16
T200	Down	32	GO:0009812	flavonoid metabolic process	0.0816327	244/20450	1.85334e-09	4.12369e-07	3.76521e-07	816620/816695/818280/819083/821164/824287/824493/824678/827220/828387/830693/831241/832524/834291/835418/842814	16
T200	Down	32	GO:0046283	anthocyanin-containing compound metabolic process	0.0510204	85/20450	8.7166e-09	1.55155e-06	1.41668e-06	816620/819083/821164/824287/824678/828387/830693/831241/834291/842814	10
T200	Down	32	GO:0010224	response to UV-B	0.0510204	104/20450	6.2115e-08	9.21373e-06	8.41277e-06	818280/818827/821164/824287/824678/827220/830693/831241/834291/842814	10
T200	Down	32	GO:0009743	response to carbohydrate	0.0765306	401/20450	7.98952e-06	0.00101581	0.000927505	815845/818614/821164/824287/824678/824896/825316/827220/830399/830693/831241/834291/835418/842814/843806	15
T200	Down	32	GO:0009698	phenylpropanoid metabolic process	0.0510204	183/20450	1.1189e-05	0.00124478	0.00113657	818280/824493/828387/830399/831241/837304/838136/838297/838847/842814	10
T200	Down	32	GO:0009744	response to sucrose	0.0510204	210/20450	3.66339e-05	0.0035333	0.00322614	818614/821164/824287/824678/827220/830693/831241/834291/842814/843806	10
T200	Down	32	GO:0034285	response to disaccharide	0.0510204	212/20450	3.96999e-05	0.0035333	0.00322614	818614/821164/824287/824678/827220/830693/831241/834291/842814/843806	10
T200	Down	32	GO:0046148	pigment biosynthetic process	0.0561224	267/20450	5.6256e-05	0.00423921	0.00387069	816620/816658/819083/821164/824287/824678/828387/830693/831241/834291/842814	11
T200	Down	32	GO:0009926	auxin polar transport	0.0357143	102/20450	5.71578e-05	0.00423921	0.00387069	818030/830000/830399/830729/831241/838138/839687	7
T200	Down	32	GO:0060918	auxin transport	0.0357143	106/20450	7.30397e-05	0.0048689	0.00444564	818030/830000/830399/830729/831241/838138/839687	7
T200	Down	32	GO:0009914	hormone transport	0.0357143	107/20450	7.75263e-05	0.0048689	0.00444564	818030/830000/830399/830729/831241/838138/839687	7
T200	Down	32	GO:0043473	pigmentation	0.0357143	113/20450	0.000109413	0.0048689	0.00444564	818030/821151/826851/830000/830399/831354/839687	7
T200	Down	32	GO:0043476	pigment accumulation	0.0357143	113/20450	0.000109413	0.0048689	0.00444564	818030/821151/826851/830000/830399/831354/839687	7
T200	Down	32	GO:0043478	pigment accumulation in response to UV light	0.0357143	113/20450	0.000109413	0.0048689	0.00444564	818030/821151/826851/830000/830399/831354/839687	7
T200	Down	32	GO:0043479	pigment accumulation in tissues in response to UV light	0.0357143	113/20450	0.000109413	0.0048689	0.00444564	818030/821151/826851/830000/830399/831354/839687	7
T200	Down	32	GO:0043480	pigment accumulation in tissues	0.0357143	113/20450	0.000109413	0.0048689	0.00444564	818030/821151/826851/830000/830399/831354/839687	7
T200	Down	32	GO:0043481	anthocyanin accumulation in tissues in response to UV light	0.0357143	113/20450	0.000109413	0.0048689	0.00444564	818030/821151/826851/830000/830399/831354/839687	7
T200	Down	32	GO:0080167	response to karrikin	0.0357143	128/20450	0.000237401	0.0100613	0.00918665	818030/818280/818596/824493/824678/826983/843806	7
T200	Down	32	GO:0007030	Golgi organization	0.0408163	177/20450	0.000316101	0.0127877	0.0116761	816605/817205/820938/825316/827055/830399/835657/837304	8
T200	Down	32	GO:0009828	plant-type cell wall loosening	0.0204082	35/20450	0.000339554	0.0131393	0.0119971	814838/822543/828940/843288	4
T200	Down	32	GO:0009699	phenylpropanoid biosynthetic process	0.0357143	139/20450	0.000392313	0.0145483	0.0132836	818280/824493/828387/830399/831241/838297/838847	7
T200	Down	32	GO:0042440	pigment metabolic process	0.0561224	346/20450	0.000531702	0.0189286	0.0172831	816620/816658/819083/821164/824287/824678/828387/830693/831241/834291/842814	11
T200	Down	32	GO:0010256	endomembrane system organization	0.0408163	195/20450	0.000601887	0.0206031	0.018812	816605/817205/820938/825316/827055/830399/835657/837304	8
T200	Down	32	GO:0006816	calcium ion transport	0.0306122	118/20450	0.000972582	0.0320592	0.0292723	817205/820938/825316/827055/830399/835657	6
T200	Down	32	GO:0009962	regulation of flavonoid biosynthetic process	0.0306122	122/20450	0.00115609	0.0358261	0.0327117	816620/816695/818280/824493/831241/835418	6
T200	Down	32	GO:0006949	syncytium formation	0.0153061	22/20450	0.00116737	0.0358261	0.0327117	814838/828940/843288	3
T200	Down	32	GO:0030243	cellulose metabolic process	0.0306122	124/20450	0.00125724	0.0372981	0.0340558	817205/822051/826851/830399/834321/843948	6
T200	Down	32	GO:0048638	regulation of developmental growth	0.0459184	277/20450	0.001458	0.0418589	0.03822	815145/818649/818884/822051/822195/830000/835526/835702/838677	9
T200	Down	32	GO:0052541	plant-type cell wall cellulose metabolic process	0.0153061	24/20450	0.00151279	0.0420746	0.038417	822051/834321/843948	3
T200	Down	32	GO:0010091	trichome branching	0.0153061	25/20450	0.00170703	0.0453529	0.0414103	818827/834133/835401	3
T200	Down	32	GO:0035266	meristem growth	0.0357143	179/20450	0.00173258	0.0453529	0.0414103	815145/818614/818649/818884/830000/835702/838677	7
T200	Up	32	GO:0071407	cellular response to organic cyclic compound	0.102439	393/20450	5.03398e-10	1.07475e-08	9.52482e-09	816579/817194/818166/818429/818605/820355/820924/821134/823706/827435/828053/828481/828854/829807/832750/833998/834210/837276/838501/843834/844423	21
T200	Up	32	GO:0009738	abscisic acid-activated signaling pathway	0.0829268	248/20450	5.73358e-10	1.19426e-08	1.05839e-08	817553/820355/822462/823706/824761/825481/828053/828606/832285/834210/836843/837276/838501/839666/843834/844423/28719408	17
T200	Up	32	GO:0009862	systemic acquired resistance, salicylic acid mediated signaling pathway	0.0829268	251/20450	6.89868e-10	1.40273e-08	1.24315e-08	816579/818166/818429/820355/820924/821134/823706/828053/828481/828854/829807/832750/833998/834210/837276/838501/844423	17
T200	Up	32	GO:0071215	cellular response to abscisic acid stimulus	0.0829268	263/20450	1.40969e-09	2.73608e-08	2.4248e-08	817553/820355/822462/823706/824761/825481/828053/828606/832285/834210/836843/837276/838501/839666/843834/844423/28719408	17
T200	Up	32	GO:0097306	cellular response to alcohol	0.0829268	263/20450	1.40969e-09	2.73608e-08	2.4248e-08	817553/820355/822462/823706/824761/825481/828053/828606/832285/834210/836843/837276/838501/839666/843834/844423/28719408	17
T200	Up	32	GO:0009723	response to ethylene	0.0926829	353/20450	3.11786e-09	5.917e-08	5.24384e-08	817674/820355/820752/821575/823815/824761/827435/827463/828606/832285/834444/834770/835507/836843/838501/838981/839666/843834/844423	19
T200	Up	32	GO:0009627	systemic acquired resistance	0.102439	446/20450	4.82416e-09	8.95616e-08	7.93724e-08	816579/818166/818429/819184/820355/820924/821134/823706/828053/828481/828854/828957/829807/829918/832750/833998/834210/837276/837998/838501/844423	21
T200	Up	32	GO:0030968	endoplasmic reticulum unfolded protein response	0.0682927	185/20450	5.61971e-09	1.02111e-07	9.04944e-08	818605/820355/822462/828053/828606/829536/829918/834210/834244/837276/837998/838501/844423/28719408	14
T200	Up	32	GO:0006986	response to unfolded protein	0.0682927	187/20450	6.45477e-09	1.10248e-07	9.77049e-08	818605/820355/822462/828053/828606/829536/829918/834210/834244/837276/837998/838501/844423/28719408	14
T200	Up	32	GO:0034620	cellular response to unfolded protein	0.0682927	187/20450	6.45477e-09	1.10248e-07	9.77049e-08	818605/820355/822462/828053/828606/829536/829918/834210/834244/837276/837998/838501/844423/28719408	14
T200	Up	32	GO:0035967	cellular response to topologically incorrect protein	0.0682927	187/20450	6.45477e-09	1.10248e-07	9.77049e-08	818605/820355/822462/828053/828606/829536/829918/834210/834244/837276/837998/838501/844423/28719408	14
T200	Up	32	GO:0000165	MAPK cascade	0.0731707	221/20450	6.99306e-09	1.14848e-07	1.01782e-07	816579/818166/818429/820355/820924/821134/823706/828053/828481/832285/832750/834210/837276/838501/844423	15
T200	Up	32	GO:0023014	signal transduction by protein phosphorylation	0.0731707	221/20450	6.99306e-09	1.14848e-07	1.01782e-07	816579/818166/818429/820355/820924/821134/823706/828053/828481/832285/832750/834210/837276/838501/844423	15
T200	Up	32	GO:2000377	regulation of reactive oxygen species metabolic process	0.0682927	205/20450	2.08733e-08	3.36336e-07	2.98072e-07	816579/818166/818429/820355/820924/821134/823706/828481/828854/829807/832750/833998/842958/844423	14
T200	Up	32	GO:0010310	regulation of hydrogen peroxide metabolic process	0.0634146	186/20450	5.14781e-08	8.14116e-07	7.21496e-07	816579/818166/818429/820355/820924/821134/823706/828481/828854/829807/832750/833998/844423	13
T200	Up	32	GO:0009873	ethylene-activated signaling pathway	0.0536585	125/20450	5.37375e-08	8.34397e-07	7.39469e-07	820752/821575/823815/827435/827463/832285/834444/834770/838981/839666/844423	11
T200	Up	32	GO:0071396	cellular response to lipid	0.0878049	381/20450	6.0823e-08	9.2755e-07	8.22025e-07	817553/820355/822462/823706/824761/824871/825481/828053/828606/832285/834210/836843/837276/838501/839666/843834/844423/28719408	18
T200	Up	32	GO:0009694	jasmonic acid metabolic process	0.0585366	158/20450	6.83075e-08	1.02341e-06	9.06982e-07	820321/823650/827230/830894/835821/838314/838501/839666/843500/843834/844423/28719408	12
T200	Up	32	GO:0009695	jasmonic acid biosynthetic process	0.0536585	135/20450	1.18864e-07	1.75017e-06	1.55106e-06	820321/823650/827230/830894/838314/838501/839666/843500/843834/844423/28719408	11
T200	Up	32	GO:0031348	negative regulation of defense response	0.0731707	277/20450	1.40007e-07	2.02655e-06	1.79599e-06	816579/818166/818429/820355/820924/821134/823706/828053/828481/828957/832750/834210/837276/838501/844423	15
T200	Up	32	GO:0000160	phosphorelay signal transduction system	0.0536585	138/20450	1.48851e-07	2.11864e-06	1.87761e-06	820752/821575/823815/827435/827463/832285/834444/834770/838981/839666/844423	11
T200	Up	32	GO:0051193	regulation of cofactor metabolic process	0.0634146	208/20450	1.90221e-07	2.66309e-06	2.36012e-06	816579/818166/818429/820355/820924/821134/823706/828481/828854/829807/832750/833998/844423	13
T200	Up	32	GO:0071369	cellular response to ethylene stimulus	0.0536585	144/20450	2.2959e-07	3.16242e-06	2.80264e-06	820752/821575/823815/827435/827463/832285/834444/834770/838981/839666/844423	11
T200	Up	32	GO:0009414	response to water deprivation	0.0878049	418/20450	2.419e-07	3.27909e-06	2.90603e-06	818166/818429/818741/820355/820667/821575/823650/823815/824193/825481/828053/828606/832530/836843/837171/838501/839666/843834	18
T200	Up	32	GO:0072593	reactive oxygen species metabolic process	0.0829268	374/20450	2.48438e-07	3.31509e-06	2.93794e-06	816579/818166/818429/818741/820355/820924/821134/823706/828481/828854/829143/829807/831104/832750/833998/842958/844423	17
T200	Up	32	GO:0042743	hydrogen peroxide metabolic process	0.0780488	334/20450	2.81594e-07	3.69971e-06	3.2788e-06	816579/818166/818429/818741/820355/820924/821134/823706/828481/828854/829143/829807/831104/832750/833998/844423	16
T200	Up	32	GO:0009415	response to water	0.0878049	426/20450	3.19479e-07	4.13387e-06	3.66356e-06	818166/818429/818741/820355/820667/821575/823650/823815/824193/825481/828053/828606/832530/836843/837171/838501/839666/843834	18
T200	Up	32	GO:0048585	negative regulation of response to stimulus	0.0780488	367/20450	9.84193e-07	1.25448e-05	1.11176e-05	816579/818166/818429/820355/820752/820924/821134/823706/828053/828481/828957/832750/834210/837276/838501/844423	16
T200	Up	32	GO:0016999	antibiotic metabolic process	0.0878049	470/20450	1.31896e-06	1.65646e-05	1.46801e-05	816579/818166/818429/818741/819184/820355/820924/821134/823706/828481/828854/829143/829807/829918/831104/832750/833998/844423	18
T200	Up	32	GO:0009595	detection of biotic stimulus	0.0390244	104/20450	1.00562e-05	0.000124464	0.000110304	818429/820355/820924/821134/823706/828481/832750/844423	8
T200	Up	32	GO:0046189	phenol-containing compound biosynthetic process	0.0536585	221/20450	1.50135e-05	0.000183164	0.000162326	818429/819184/820355/820924/821134/823706/828481/829918/832750/833520/844423	11
T200	Up	32	GO:0034976	response to endoplasmic reticulum stress	0.0682927	357/20450	1.58168e-05	0.000190247	0.000168603	818605/820355/822462/828053/828606/829536/829918/834210/834244/837276/837998/838501/844423/28719408	14
T200	Up	32	GO:0035966	response to topologically incorrect protein	0.0682927	369/20450	2.28142e-05	0.000270602	0.000239816	818605/820355/822462/828053/828606/829536/829918/834210/834244/837276/837998/838501/844423/28719408	14
T200	Up	32	GO:0018958	phenol-containing compound metabolic process	0.0536585	238/20450	2.98078e-05	0.00034871	0.000309038	818429/819184/820355/820924/821134/823706/828481/829918/832750/833520/844423	11
T200	Up	32	GO:0009646	response to absence of light	0.0243902	37/20450	3.23706e-05	0.000373575	0.000331074	817194/818588/818741/823888/844423	5
T200	Up	32	GO:0017000	antibiotic biosynthetic process	0.0585366	288/20450	3.59474e-05	0.00040932	0.000362753	818429/819184/820355/820924/821134/823706/828481/829143/829918/831104/832750/844423	12
T200	Up	32	GO:0042538	hyperosmotic salinity response	0.0439024	161/20450	3.67975e-05	0.000413488	0.000366446	820355/820667/828606/832530/836843/837171/838501/839666/843834	9
T200	Up	32	GO:0009697	salicylic acid biosynthetic process	0.0487805	209/20450	5.14396e-05	0.000570512	0.000505606	818429/819184/820355/820924/821134/823706/828481/829918/832750/844423	10
T200	Up	32	GO:0009696	salicylic acid metabolic process	0.0487805	222/20450	8.51592e-05	0.000932384	0.000826308	818429/819184/820355/820924/821134/823706/828481/829918/832750/844423	10
T200	Up	32	GO:0051606	detection of stimulus	0.0390244	144/20450	0.000104424	0.00112883	0.00100041	818429/820355/820924/821134/823706/828481/832750/844423	8
T200	Up	32	GO:0043900	regulation of multi-organism process	0.0390244	146/20450	0.000114954	0.00122714	0.00108753	818429/820355/820924/821134/823706/828481/832750/844423	8
T200	Up	32	GO:0006979	response to oxidative stress	0.0731707	485/20450	0.000119093	0.00125562	0.00111277	818588/822462/823706/824193/825481/827463/828053/828481/834244/836437/837252/837253/837998/839666/842198	15
T200	Up	32	GO:0009642	response to light intensity	0.0536585	283/20450	0.000140749	0.00146585	0.00129908	817194/818588/818741/823888/825481/827463/837253/837998/838314/839666/844423	11
T200	Up	32	GO:0042742	defense response to bacterium	0.0634146	398/20450	0.000200445	0.00206241	0.00182777	818166/818429/818588/820355/820752/820924/821134/823706/828481/832285/832750/838501/844423	13
T200	Up	32	GO:0006972	hyperosmotic response	0.0487805	250/20450	0.000224543	0.00228285	0.00202314	818741/820355/820667/828606/832530/836843/837171/838501/839666/843834	10
T200	Up	32	GO:0042537	benzene-containing compound metabolic process	0.0487805	261/20450	0.000316596	0.00318086	0.00281898	818429/819184/820355/820924/821134/823706/828481/829918/832750/844423	10
T200	Up	32	GO:0001666	response to hypoxia	0.0292683	100/20450	0.000514222	0.00510634	0.00452541	819721/823706/828854/829807/832750/833998	6
T200	Up	32	GO:0036293	response to decreased oxygen levels	0.0292683	103/20450	0.000601701	0.00590635	0.0052344	819721/823706/828854/829807/832750/833998	6
T200	Up	32	GO:0070482	response to oxygen levels	0.0292683	104/20450	0.000633289	0.00614578	0.00544659	819721/823706/828854/829807/832750/833998	6
T200	Up	32	GO:0000302	response to reactive oxygen species	0.0487805	318/20450	0.00144271	0.0138435	0.0122686	824193/825481/827463/828053/828481/834244/836437/837253/837998/842198	10
T200	Up	32	GO:0015995	chlorophyll biosynthetic process	0.0292683	125/20450	0.00164653	0.0156238	0.0138463	816579/823650/827230/835507/841029/842198	6
T200	Up	32	GO:0015802	basic amino acid transport	0.0146341	27/20450	0.00243159	0.0228195	0.0202234	820355/829918/844074	3
T200	Up	32	GO:0015696	ammonium transport	0.0146341	31/20450	0.00362852	0.0336821	0.0298502	820355/829918/844074	3
T200	Up	32	GO:0052542	defense response by callose deposition	0.0195122	63/20450	0.00368171	0.0338084	0.0299621	829536/834244/842450/844163	4
T200	Up	32	GO:0006779	porphyrin-containing compound biosynthetic process	0.0292683	151/20450	0.00422197	0.0383571	0.0339933	816579/823650/827230/835507/841029/842198	6
T200	Up	32	GO:0033014	tetrapyrrole biosynthetic process	0.0292683	154/20450	0.00464488	0.041755	0.0370046	816579/823650/827230/835507/841029/842198	6
T200	Up	32	GO:0009816	defense response to bacterium, incompatible interaction	0.0146341	35/20450	0.00513063	0.0447025	0.0396168	818588/828481/832750	3
T200	Up	32	GO:0010120	camalexin biosynthetic process	0.0097561	11/20450	0.00518214	0.0447025	0.0396168	818429/823706	2
T200	Up	32	GO:0051865	protein autoubiquitination	0.0097561	11/20450	0.00518214	0.0447025	0.0396168	818166/823815	2
T200	Up	32	GO:0052317	camalexin metabolic process	0.0097561	11/20450	0.00518214	0.0447025	0.0396168	818429/823706	2
T200	Up	32	GO:0010029	regulation of seed germination	0.0195122	70/20450	0.00536817	0.0458441	0.0406285	819828/825481/827587/842314	4

## Sheet: T200_67
T200 at 67 dpi. Enriched (adjusted p value <1E-08) GOs highlighted in green are represented in the heat map (figure 8)
Plant	Expression	Timepoint	ID	Description	Ratio	BgRatio	pvalue	p.adjust	qvalue	geneID	Count
T200	Up	67	GO:0010200	response to chitin	0.219512	421/20450	9.16211e-27	6.82577e-24	5.56478e-24	816909/816913/817778/818319/818429/818588/818605/820355/820752/820924/823706/823815/824807/825319/825399/827435/827463/827622/828481/828516/828559/828836/829591/829880/829918/832285/832750/834770/835193/836242/836655/838456/839666/842745/843500/844163	36
T200	Up	67	GO:0010243	response to organonitrogen compound	0.219512	443/20450	5.40825e-26	2.01457e-23	1.6424e-23	816909/816913/817778/818319/818429/818588/818605/820355/820752/820924/823706/823815/824807/825319/825399/827435/827463/827622/828481/828516/828559/828836/829591/829880/829918/832285/832750/834770/835193/836242/836655/838456/839666/842745/843500/844163	36
T200	Up	67	GO:0035556	intracellular signal transduction	0.176829	495/20450	4.07075e-17	1.0109e-14	8.24148e-15	815147/818319/818429/818605/820355/820429/820752/820924/823706/823815/824807/827435/827463/827622/828053/828481/829591/832285/832750/834210/834444/834770/835193/836211/836242/836655/837276/839666/839748	29
T200	Up	67	GO:0002679	respiratory burst involved in defense response	0.103659	121/20450	1.08784e-16	1.62088e-14	1.32144e-14	818319/818429/818605/820355/820752/820924/823815/824807/827435/827463/827622/829591/832285/834770/835193/836242/839666	17
T200	Up	67	GO:0045730	respiratory burst	0.103659	121/20450	1.08784e-16	1.62088e-14	1.32144e-14	818319/818429/818605/820355/820752/820924/823815/824807/827435/827463/827622/829591/832285/834770/835193/836242/839666	17
T200	Up	67	GO:0045088	regulation of innate immune response	0.152439	419/20450	4.88468e-15	5.79893e-13	4.72764e-13	815147/818429/818605/819244/820355/820752/820924/823706/824807/827435/828053/828481/829466/829623/829918/830934/832750/833550/834210/836211/836242/837276/838456/839748/844074	25
T200	Up	67	GO:0050776	regulation of immune response	0.152439	421/20450	5.44866e-15	5.79893e-13	4.72764e-13	815147/818429/818605/819244/820355/820752/820924/823706/824807/827435/828053/828481/829466/829623/829918/830934/832750/833550/834210/836211/836242/837276/838456/839748/844074	25
T200	Up	67	GO:0002682	regulation of immune system process	0.152439	424/20450	6.41185e-15	5.97104e-13	4.86795e-13	815147/818429/818605/819244/820355/820752/820924/823706/824807/827435/828053/828481/829466/829623/829918/830934/832750/833550/834210/836211/836242/837276/838456/839748/844074	25
T200	Up	67	GO:0009626	plant-type hypersensitive response	0.146341	400/20450	1.59468e-14	1.25524e-12	1.02334e-12	815147/818429/818605/820355/820924/823706/824807/827435/828053/828481/829466/829623/829918/830934/832750/833550/834210/836211/836242/837276/838456/839748/839808/844074	24
T200	Up	67	GO:0034050	host programmed cell death induced by symbiont	0.146341	401/20450	1.68488e-14	1.25524e-12	1.02334e-12	815147/818429/818605/820355/820924/823706/824807/827435/828053/828481/829466/829623/829918/830934/832750/833550/834210/836211/836242/837276/838456/839748/839808/844074	24
T200	Up	67	GO:0010941	regulation of cell death	0.146341	404/20450	1.98541e-14	1.34466e-12	1.09625e-12	815147/817746/818429/818605/820355/820924/823706/824807/827435/828053/828481/829466/829623/829918/830934/832750/833550/834210/836211/836242/837276/838456/839748/844074	24
T200	Up	67	GO:0008219	cell death	0.158537	496/20450	2.81046e-14	1.68946e-12	1.37735e-12	814657/815147/817746/818429/818605/820355/820924/823706/824807/827435/828053/828481/829466/829623/829918/830934/832750/833550/834210/836211/836242/837276/838456/839748/839808/844074	26
T200	Up	67	GO:0010363	regulation of plant-type hypersensitive response	0.140244	371/20450	2.94806e-14	1.68946e-12	1.37735e-12	815147/818429/818605/820355/820924/823706/824807/827435/828053/828481/829466/829623/829918/830934/832750/833550/834210/836211/836242/837276/838456/839748/844074	23
T200	Up	67	GO:0009611	response to wounding	0.134146	335/20450	3.45448e-14	1.73689e-12	1.41602e-12	815147/816913/819244/820355/820429/820924/821214/822051/823706/823815/828053/828540/828559/828836/829567/829623/835193/836242/838456/839666/839748/843500	22
T200	Up	67	GO:0006612	protein targeting to membrane	0.140244	374/20450	3.49709e-14	1.73689e-12	1.41602e-12	815147/818429/818605/820355/820924/823706/824807/827435/828053/828481/829466/829623/829918/830934/832750/833550/834210/836211/836242/837276/838456/839748/844074	23
T200	Up	67	GO:0072657	protein localization to membrane	0.140244	377/20450	4.14185e-14	1.81511e-12	1.47978e-12	815147/818429/818605/820355/820924/823706/824807/827435/828053/828481/829466/829623/829918/830934/832750/833550/834210/836211/836242/837276/838456/839748/844074	23
T200	Up	67	GO:0090150	establishment of protein localization to membrane	0.140244	377/20450	4.14185e-14	1.81511e-12	1.47978e-12	815147/818429/818605/820355/820924/823706/824807/827435/828053/828481/829466/829623/829918/830934/832750/833550/834210/836211/836242/837276/838456/839748/844074	23
T200	Up	67	GO:0080135	regulation of cellular response to stress	0.140244	385/20450	6.45508e-14	2.67169e-12	2.17812e-12	815147/818429/818605/820355/820924/823706/824807/827435/828053/828481/829466/829623/829918/830934/832750/833550/834210/836211/836242/837276/838456/839748/844074	23
T200	Up	67	GO:0043067	regulation of programmed cell death	0.140244	396/20450	1.16797e-13	4.57967e-12	3.73362e-12	815147/818429/818605/820355/820924/823706/824807/827435/828053/828481/829466/829623/829918/830934/832750/833550/834210/836211/836242/837276/838456/839748/844074	23
T200	Up	67	GO:0012501	programmed cell death	0.146341	448/20450	1.89528e-13	7.05992e-12	5.75567e-12	815147/818429/818605/820355/820924/823706/824807/827435/828053/828481/829466/829623/829918/830934/832750/833550/834210/836211/836242/837276/838456/839748/839808/844074	24
T200	Up	67	GO:0009692	ethylene metabolic process	0.0853659	119/20450	7.41787e-13	2.1255e-11	1.73284e-11	816913/818319/819828/823815/824944/827388/827435/828540/828559/829591/832285/834244/836655/839748	14
T200	Up	67	GO:0009693	ethylene biosynthetic process	0.0853659	119/20450	7.41787e-13	2.1255e-11	1.73284e-11	816913/818319/819828/823815/824944/827388/827435/828540/828559/829591/832285/834244/836655/839748	14
T200	Up	67	GO:0043449	cellular alkene metabolic process	0.0853659	119/20450	7.41787e-13	2.1255e-11	1.73284e-11	816913/818319/819828/823815/824944/827388/827435/828540/828559/829591/832285/834244/836655/839748	14
T200	Up	67	GO:0043450	alkene biosynthetic process	0.0853659	119/20450	7.41787e-13	2.1255e-11	1.73284e-11	816913/818319/819828/823815/824944/827388/827435/828540/828559/829591/832285/834244/836655/839748	14
T200	Up	67	GO:1900673	olefin metabolic process	0.0853659	119/20450	7.41787e-13	2.1255e-11	1.73284e-11	816913/818319/819828/823815/824944/827388/827435/828540/828559/829591/832285/834244/836655/839748	14
T200	Up	67	GO:1900674	olefin biosynthetic process	0.0853659	119/20450	7.41787e-13	2.1255e-11	1.73284e-11	816913/818319/819828/823815/824944/827388/827435/828540/828559/829591/832285/834244/836655/839748	14
T200	Up	67	GO:0002252	immune effector process	0.115854	279/20450	1.13239e-12	3.12455e-11	2.54732e-11	818319/818429/818605/819244/820355/820752/820924/823815/824807/827435/827463/827622/829591/832285/832530/834770/835193/836242/839666	19
T200	Up	67	GO:0009751	response to salicylic acid	0.140244	473/20450	4.61286e-12	1.22735e-10	1.00061e-10	815147/818429/818588/818605/820355/820924/823706/824807/827435/828053/828481/829623/829807/829880/832750/833550/833998/834210/836211/836242/836437/837276/839748	23
T200	Up	67	GO:0035690	cellular response to drug	0.128049	390/20450	6.2522e-12	1.58504e-10	1.29222e-10	815147/816909/818429/818605/820355/820924/823706/824807/827435/828053/828481/829623/829807/832750/833550/833998/834210/836211/836242/837276/839748	21
T200	Up	67	GO:0043069	negative regulation of programmed cell death	0.0914634	168/20450	6.38272e-12	1.58504e-10	1.29222e-10	815147/818429/818605/820355/823706/824807/828053/829918/830934/832750/834210/836242/837276/839748/844074	15
T200	Up	67	GO:0050832	defense response to fungus	0.121951	350/20450	7.03909e-12	1.69165e-10	1.37914e-10	815147/816913/818289/818429/818605/820355/820429/820924/823706/824807/828053/828481/829591/829918/832750/834210/836242/837276/839748/839808	20
T200	Up	67	GO:0009863	salicylic acid mediated signaling pathway	0.121951	353/20450	8.21994e-12	1.9137e-10	1.56017e-10	815147/818429/818605/820355/820924/823706/824807/827435/828053/828481/829623/829807/832750/833550/833998/834210/836211/836242/837276/839748	20
T200	Up	67	GO:0060548	negative regulation of cell death	0.0914634	172/20450	8.97515e-12	1.99562e-10	1.62695e-10	815147/818429/818605/820355/823706/824807/828053/829918/830934/832750/834210/836242/837276/839748/844074	15
T200	Up	67	GO:0071446	cellular response to salicylic acid stimulus	0.121951	355/20450	9.10753e-12	1.99562e-10	1.62695e-10	815147/818429/818605/820355/820924/823706/824807/827435/828053/828481/829623/829807/832750/833550/833998/834210/836211/836242/837276/839748	20
T200	Up	67	GO:0071236	cellular response to antibiotic	0.121951	364/20450	1.43295e-11	3.05015e-10	2.48666e-10	815147/818429/818605/820355/820924/823706/824807/827435/828053/828481/829623/829807/832750/833550/833998/834210/836211/836242/837276/839748	20
T200	Up	67	GO:0009867	jasmonic acid mediated signaling pathway	0.109756	286/20450	1.71871e-11	3.46064e-10	2.82132e-10	815147/818429/819244/820355/820752/820924/823706/824807/827435/828053/828481/829623/832750/834210/836211/836242/837276/839748	18
T200	Up	67	GO:0071395	cellular response to jasmonic acid stimulus	0.109756	286/20450	1.71871e-11	3.46064e-10	2.82132e-10	815147/818429/819244/820355/820752/820924/823706/824807/827435/828053/828481/829623/832750/834210/836211/836242/837276/839748	18
T200	Up	67	GO:0009862	systemic acquired resistance, salicylic acid mediated signaling pathway	0.103659	251/20450	2.03481e-11	3.98929e-10	3.25231e-10	815147/818429/820355/820924/823706/824807/828053/828481/829807/832750/833550/833998/834210/836211/836242/837276/839748	17
T200	Up	67	GO:0009753	response to jasmonic acid	0.134146	474/20450	3.45049e-11	6.59132e-10	5.37363e-10	815147/818429/819244/820355/820752/820924/823706/824807/827435/828053/828481/828540/829623/829880/832750/834210/836211/836242/837276/839666/839748/843500	22
T200	Up	67	GO:0071407	cellular response to organic cyclic compound	0.121951	393/20450	5.67088e-11	1.0562e-09	8.61079e-10	815147/818429/818605/820355/820924/823706/824807/827435/828053/828481/829623/829807/832750/833550/833998/834210/836211/836242/837276/839748	20
T200	Up	67	GO:0031348	negative regulation of defense response	0.103659	277/20450	9.59086e-11	1.74273e-09	1.42078e-09	815147/818429/819244/820355/820924/823706/824807/828053/828481/829466/832750/833550/834210/836211/836242/837276/839748	17
T200	Up	67	GO:0000165	MAPK cascade	0.0914634	221/20450	3.17309e-10	5.49756e-09	4.48194e-09	815147/818429/820355/820924/823706/824807/828053/828481/832285/832750/834210/836211/836242/837276/839748	15
T200	Up	67	GO:0023014	signal transduction by protein phosphorylation	0.0914634	221/20450	3.17309e-10	5.49756e-09	4.48194e-09	815147/818429/820355/820924/823706/824807/828053/828481/832285/832750/834210/836211/836242/837276/839748	15
T200	Down	67	GO:0009812	flavonoid metabolic process	0.0740741	244/20450	6.67184e-08	3.19258e-05	2.86062e-05	818280/824287/824493/826571/827220/828387/828669/830693/831241/834291/837849/841593/842469/842814	14
T200	Down	67	GO:0009718	anthocyanin-containing compound biosynthetic process	0.042328	60/20450	7.78679e-08	3.19258e-05	2.86062e-05	824287/826571/828387/830693/831241/834291/837849/842814	8
T200	Down	67	GO:0009813	flavonoid biosynthetic process	0.0687831	217/20450	1.20901e-07	3.30464e-05	2.96102e-05	818280/824287/824493/826571/827220/828387/830693/831241/834291/837849/841593/842469/842814	13
T200	Down	67	GO:0080167	response to karrikin	0.0529101	128/20450	3.16364e-07	6.48547e-05	5.81112e-05	818280/818596/821206/824493/826983/834906/835256/836562/836826/843806	10
T200	Down	67	GO:0010224	response to UV-B	0.047619	104/20450	5.24756e-07	7.31595e-05	6.55525e-05	818280/824287/826571/827220/830693/831241/831738/834291/842814	9
T200	Down	67	GO:0009411	response to UV	0.0687831	247/20450	5.35314e-07	7.31595e-05	6.55525e-05	818280/820441/824287/826571/827220/827774/830693/831241/831738/834291/839325/841593/842814	13
T200	Down	67	GO:0046283	anthocyanin-containing compound metabolic process	0.042328	85/20450	1.20298e-06	0.000140921	0.000126268	824287/826571/828387/830693/831241/834291/837849/842814	8
T200	Down	67	GO:0019725	cellular homeostasis	0.0687831	316/20450	8.12704e-06	0.000833021	0.000746404	821047/823860/827956/829321/829661/831375/832185/832494/834794/835657/842563/843497/843593	13
T200	Down	67	GO:0009744	response to sucrose	0.0529101	210/20450	2.68585e-05	0.00238819	0.00213986	824287/824578/826571/827220/830693/831241/834291/837543/842814/843806	10
T200	Down	67	GO:0034285	response to disaccharide	0.0529101	212/20450	2.91242e-05	0.00238819	0.00213986	824287/824578/826571/827220/830693/831241/834291/837543/842814/843806	10
T200	Down	67	GO:0046148	pigment biosynthetic process	0.0582011	267/20450	4.04139e-05	0.00301267	0.00269942	820500/824287/826571/828387/830052/830693/831241/834291/837515/837849/842814	11
T200	Down	67	GO:0009699	phenylpropanoid biosynthetic process	0.042328	139/20450	4.60573e-05	0.00314725	0.00282	818280/824493/826571/828387/828469/831241/841593/842563	8
T200	Down	67	GO:0009698	phenylpropanoid metabolic process	0.047619	183/20450	5.31095e-05	0.00330044	0.00295726	818280/824493/826571/828387/828469/831241/841593/842563/842814	9
T200	Down	67	GO:0048638	regulation of developmental growth	0.0582011	277/20450	5.63489e-05	0.00330044	0.00295726	815130/815145/818649/818884/827774/828024/829595/831001/835526/838405/838677	11
T200	Down	67	GO:0006873	cellular ion homeostasis	0.0582011	290/20450	8.49119e-05	0.00464185	0.00415919	821047/823860/827956/829321/832185/832494/834794/835657/842563/843497/843593	11
T200	Down	67	GO:0055082	cellular chemical homeostasis	0.0582011	299/20450	0.000111272	0.00570267	0.00510971	821047/823860/827956/829321/832185/832494/834794/835657/842563/843497/843593	11
T200	Down	67	GO:0040008	regulation of growth	0.0582011	306/20450	0.000136334	0.00644755	0.00577714	815130/815145/818649/818884/827774/828024/829595/831001/835526/838405/838677	11
T200	Down	67	GO:0009664	plant-type cell wall organization	0.0634921	361/20450	0.000141532	0.00644755	0.00577714	814838/815145/817830/818161/818476/822543/829595/832832/834797/843288/843408/843948	12
T200	Down	67	GO:0010075	regulation of meristem growth	0.042328	171/20450	0.000195586	0.00844108	0.00756338	815130/815145/818649/818884/827774/828024/838405/838677	8
T200	Down	67	GO:0035266	meristem growth	0.042328	179/20450	0.000266886	0.0109423	0.00980455	815130/815145/818649/818884/827774/828024/838405/838677	8
T200	Down	67	GO:0030003	cellular cation homeostasis	0.0529101	281/20450	0.000297577	0.0116197	0.0104115	823860/827956/829321/832185/832494/834794/835657/842563/843497/843593	10
T200	Down	67	GO:0050801	ion homeostasis	0.0582011	342/20450	0.000354795	0.0131828	0.0118121	821047/823860/827956/829321/832185/832494/834794/835657/842563/843497/843593	11
T200	Down	67	GO:0009743	response to carbohydrate	0.0634921	401/20450	0.000369761	0.0131828	0.0118121	824287/824578/825316/826571/827220/830693/831241/834291/837543/841665/842814/843806	12
T200	Down	67	GO:0042440	pigment metabolic process	0.0582011	346/20450	0.00039133	0.0133083	0.0119245	820500/824287/826571/828387/830052/830693/831241/834291/837515/837849/842814	11
T200	Down	67	GO:0006598	polyamine catabolic process	0.021164	38/20450	0.000408016	0.0133083	0.0119245	818280/824493/841593/842563	4
T200	Down	67	GO:0042592	homeostatic process	0.0687831	467/20450	0.00042197	0.0133083	0.0119245	821047/823860/827956/829321/829661/831375/832185/832494/834794/835657/842563/843497/843593	13
T200	Down	67	GO:0071669	plant-type cell wall organization or biogenesis	0.0687831	479/20450	0.000535427	0.0162611	0.0145703	814838/815145/817830/818161/818476/822543/829595/832832/834797/839325/843288/843408/843948	13
T200	Down	67	GO:0070838	divalent metal ion transport	0.042328	209/20450	0.000746581	0.0203531	0.0182368	819281/823860/825316/827055/832185/835657/842563/843593	8
T200	Down	67	GO:0009310	amine catabolic process	0.031746	117/20450	0.000770318	0.0203531	0.0182368	818280/820651/821965/824493/841593/842563	6
T200	Down	67	GO:0042402	cellular biogenic amine catabolic process	0.031746	117/20450	0.000770318	0.0203531	0.0182368	818280/820651/821965/824493/841593/842563	6
T200	Down	67	GO:0055080	cation homeostasis	0.0529101	318/20450	0.000779835	0.0203531	0.0182368	823860/827956/829321/832185/832494/834794/835657/842563/843497/843593	10
T200	Down	67	GO:0072511	divalent inorganic cation transport	0.042328	211/20450	0.000794268	0.0203531	0.0182368	819281/823860/825316/827055/832185/835657/842563/843593	8
T200	Down	67	GO:0044106	cellular amine metabolic process	0.037037	167/20450	0.000941518	0.0226074	0.0202567	818280/820651/821965/824493/841593/842563/843236	7
T200	Down	67	GO:0009962	regulation of flavonoid biosynthetic process	0.031746	122/20450	0.000958513	0.0226074	0.0202567	818280/824493/826571/831241/841593/842469	6
T200	Down	67	GO:0048878	chemical homeostasis	0.0582011	386/20450	0.000964952	0.0226074	0.0202567	821047/823860/827956/829321/832185/832494/834794/835657/842563/843497/843593	11
T200	Down	67	GO:0010374	stomatal complex development	0.042328	222/20450	0.00110223	0.0251064	0.0224959	819082/819584/823977/824087/831001/832185/840324/843593	8
T200	Down	67	GO:0048509	regulation of meristem development	0.042328	224/20450	0.00116729	0.0258697	0.0231797	815130/815145/818649/818884/827774/828024/838405/838677	8
T200	Down	67	GO:0009308	amine metabolic process	0.042328	229/20450	0.0013434	0.0289892	0.0259749	817635/818280/820651/821965/824493/841593/842563/843236	8
T200	Down	67	GO:0010073	meristem maintenance	0.047619	285/20450	0.00137925	0.0289996	0.0259842	815130/815145/818649/818884/827774/828024/834451/838405/838677	9
T200	Down	67	GO:0010119	regulation of stomatal movement	0.021164	53/20450	0.00145327	0.0297921	0.0266944	835657/841537/843288/843321	4
T200	Down	67	GO:0006595	polyamine metabolic process	0.021164	54/20450	0.00155833	0.0304245	0.027261	818280/824493/841593/842563	4
T200	Down	67	GO:0009805	coumarin biosynthetic process	0.021164	54/20450	0.00155833	0.0304245	0.027261	818280/824493/841593/842563	4
T200	Down	67	GO:0009804	coumarin metabolic process	0.021164	55/20450	0.00166855	0.0311265	0.02789	818280/824493/841593/842563	4
T200	Down	67	GO:0042737	drug catabolic process	0.031746	137/20450	0.00173958	0.0311265	0.02789	818280/820651/824415/829661/830052/832233	6
T200	Down	67	GO:0010393	galacturonan metabolic process	0.021164	56/20450	0.00178408	0.0311265	0.02789	817830/817922/818161/843948	4
T200	Down	67	GO:0042398	cellular modified amino acid biosynthetic process	0.021164	56/20450	0.00178408	0.0311265	0.02789	818280/824493/841593/842563	4
T200	Down	67	GO:0045488	pectin metabolic process	0.021164	56/20450	0.00178408	0.0311265	0.02789	817830/817922/818161/843948	4
T200	Down	67	GO:0010118	stomatal movement	0.026455	97/20450	0.0020742	0.0354343	0.0317499	832494/835657/841537/843288/843321	5
T200	Down	67	GO:0042547	cell wall modification involved in multidimensional cell growth	0.015873	28/20450	0.00214704	0.0359301	0.0321941	814838/822543/843408	3
T200	Down	67	GO:0098771	inorganic ion homeostasis	0.042328	248/20450	0.00221414	0.0363118	0.0325361	821047/827956/829321/832494/834794/835657/842563/843497	8
T200	Down	67	GO:0006875	cellular metal ion homeostasis	0.037037	195/20450	0.00228898	0.0368031	0.0329764	827956/829321/832494/834794/835657/842563/843497	7
T200	Down	67	GO:0044036	cell wall macromolecule metabolic process	0.047619	309/20450	0.00238995	0.0376877	0.0337689	814838/816201/818161/824456/825375/828080/834794/838790/843948	9
T200	Down	67	GO:0010103	stomatal complex morphogenesis	0.031746	149/20450	0.0026533	0.041051	0.0367826	819584/823977/824087/832185/840324/843593	6
T200	Down	67	GO:0044550	secondary metabolite biosynthetic process	0.047619	316/20450	0.00277531	0.0421436	0.0377615	818280/821206/824493/826571/828387/828469/831241/841593/842563	9
T200	Down	67	GO:0042545	cell wall modification	0.047619	325/20450	0.00334136	0.0498166	0.0446367	814838/817830/818476/822543/829595/832832/834797/843288/843408	9
T200	Up	67	GO:0048585	negative regulation of response to stimulus	0.109756	367/20450	9.93116e-10	1.68153e-08	1.37088e-08	815147/818429/819244/820355/820752/820924/823706/824807/828053/828481/829466/832750/833550/834210/836211/836242/837276/839748	18
T200	Up	67	GO:2000377	regulation of reactive oxygen species metabolic process	0.0853659	205/20450	1.17006e-09	1.93709e-08	1.57924e-08	818429/819244/820355/820924/823706/824807/828481/829807/832750/833998/836211/836242/839748/842958	14
T200	Up	67	GO:0009612	response to mechanical stimulus	0.054878	63/20450	1.79791e-09	2.91183e-08	2.3739e-08	816913/820924/823815/828559/828836/835193/836242/838456/839666	9
T200	Up	67	GO:0009627	systemic acquired resistance	0.115854	446/20450	3.41183e-09	5.40812e-08	4.40902e-08	815147/818429/819244/820355/820924/823706/824807/828053/828481/829807/829918/832750/833550/833998/834210/836211/836242/837276/839748	19
T200	Up	67	GO:0009723	response to ethylene	0.097561	353/20450	2.69219e-08	4.1785e-07	3.40656e-07	820355/820429/820752/823815/827435/827463/829623/829880/832285/834444/834770/835507/836655/839666/839748/842193	16
T200	Up	67	GO:0010310	regulation of hydrogen peroxide metabolic process	0.0731707	186/20450	3.53177e-08	5.36973e-07	4.37772e-07	818429/820355/820924/823706/824807/828481/829807/832750/833998/836211/836242/839748	12
T200	Up	67	GO:0051193	regulation of cofactor metabolic process	0.0731707	208/20450	1.2071e-07	1.79857e-06	1.4663e-06	818429/820355/820924/823706/824807/828481/829807/832750/833998/836211/836242/839748	12
T200	Up	67	GO:0030968	endoplasmic reticulum unfolded protein response	0.0670732	185/20450	3.04813e-07	4.45266e-06	3.63008e-06	815147/818605/820355/828053/829918/830934/834210/834244/836242/837276/839748	11
T200	Up	67	GO:0006986	response to unfolded protein	0.0670732	187/20450	3.3952e-07	4.68412e-06	3.81877e-06	815147/818605/820355/828053/829918/830934/834210/834244/836242/837276/839748	11
T200	Up	67	GO:0034620	cellular response to unfolded protein	0.0670732	187/20450	3.3952e-07	4.68412e-06	3.81877e-06	815147/818605/820355/828053/829918/830934/834210/834244/836242/837276/839748	11
T200	Up	67	GO:0035967	cellular response to topologically incorrect protein	0.0670732	187/20450	3.3952e-07	4.68412e-06	3.81877e-06	815147/818605/820355/828053/829918/830934/834210/834244/836242/837276/839748	11
T200	Up	67	GO:0072593	reactive oxygen species metabolic process	0.0914634	374/20450	3.61728e-07	4.89977e-06	3.99459e-06	818429/818741/819244/820355/820924/823706/824807/828481/829807/832750/833998/836211/836242/839748/842958	15
T200	Up	67	GO:0009873	ethylene-activated signaling pathway	0.054878	125/20450	7.60481e-07	1.01171e-05	8.24807e-06	820429/820752/823815/827435/827463/832285/834444/834770/839666	9
T200	Up	67	GO:0042742	defense response to bacterium	0.0914634	398/20450	7.92912e-07	1.02444e-05	8.35185e-06	815147/818429/818588/819244/820355/820752/820924/823706/824807/828481/829466/832285/832750/836242/839748	15
T200	Up	67	GO:0009738	abscisic acid-activated signaling pathway	0.0731707	248/20450	7.97551e-07	1.02444e-05	8.35185e-06	815147/819280/820355/823706/828053/829623/832285/834210/836655/837276/839666/839748	12
T200	Up	67	GO:0071215	cellular response to abscisic acid stimulus	0.0731707	263/20450	1.47823e-06	1.83547e-05	1.49639e-05	815147/819280/820355/823706/828053/829623/832285/834210/836655/837276/839666/839748	12
T200	Up	67	GO:0097306	cellular response to alcohol	0.0731707	263/20450	1.47823e-06	1.83547e-05	1.49639e-05	815147/819280/820355/823706/828053/829623/832285/834210/836655/837276/839666/839748	12
T200	Up	67	GO:0000160	phosphorelay signal transduction system	0.054878	138/20450	1.74425e-06	2.13027e-05	1.73673e-05	820429/820752/823815/827435/827463/832285/834444/834770/839666	9
T200	Up	67	GO:0009595	detection of biotic stimulus	0.0487805	104/20450	1.93298e-06	2.32269e-05	1.8936e-05	818429/820355/820924/823706/824807/828481/832750/836242	8
T200	Up	67	GO:0051606	detection of stimulus	0.054878	144/20450	2.48375e-06	2.89124e-05	2.35711e-05	818429/819244/820355/820924/823706/824807/828481/832750/836242	9
T200	Up	67	GO:0071369	cellular response to ethylene stimulus	0.054878	144/20450	2.48375e-06	2.89124e-05	2.35711e-05	820429/820752/823815/827435/827463/832285/834444/834770/839666	9
T200	Up	67	GO:0042743	hydrogen peroxide metabolic process	0.0792683	334/20450	3.12316e-06	3.57963e-05	2.91832e-05	818429/818741/820355/820924/823706/824807/828481/829807/832750/833998/836211/836242/839748	13
T200	Up	67	GO:0016999	antibiotic metabolic process	0.0914634	470/20450	6.09129e-06	6.87577e-05	5.60554e-05	815147/818429/818741/820355/820924/823706/824807/828481/829807/829918/832750/833998/836211/836242/839748	15
T200	Up	67	GO:0009697	salicylic acid biosynthetic process	0.0609756	209/20450	7.49373e-06	8.33258e-05	6.79322e-05	815147/818429/820355/820924/823706/824807/828481/829918/832750/836242	10
T200	Up	67	GO:0046189	phenol-containing compound biosynthetic process	0.0609756	221/20450	1.22101e-05	0.000133772	0.000109059	815147/818429/820355/820924/823706/824807/828481/829918/832750/836242	10
T200	Up	67	GO:0009696	salicylic acid metabolic process	0.0609756	222/20450	1.26988e-05	0.000137111	0.000111781	815147/818429/820355/820924/823706/824807/828481/829918/832750/836242	10
T200	Up	67	GO:0006862	nucleotide transport	0.0304878	39/20450	1.44114e-05	0.000153378	0.000125043	819693/820355/829918/836242/844074	5
T200	Up	67	GO:0018958	phenol-containing compound metabolic process	0.0609756	238/20450	2.31499e-05	0.000242911	0.000198035	815147/818429/820355/820924/823706/824807/828481/829918/832750/836242	10
T200	Up	67	GO:0043900	regulation of multi-organism process	0.0487805	146/20450	2.37912e-05	0.000246173	0.000200695	818429/820355/820924/823706/824807/828481/832750/836242	8
T200	Up	67	GO:0009625	response to insect	0.0304878	45/20450	2.94172e-05	0.000300217	0.000244755	815147/820355/824807/833550/836242	5
T200	Up	67	GO:0035966	response to topologically incorrect protein	0.0731707	369/20450	4.46547e-05	0.000449564	0.000366511	815147/818605/819693/820355/828053/829918/830934/834210/834244/836242/837276/839748	12
T200	Up	67	GO:0042538	hyperosmotic salinity response	0.0487805	161/20450	4.78855e-05	0.000475663	0.000387789	815147/818694/819280/820355/829623/832530/839666/839748	8
T200	Up	67	GO:0042537	benzene-containing compound metabolic process	0.0609756	261/20450	5.06185e-05	0.000496195	0.000404528	815147/818429/820355/820924/823706/824807/828481/829918/832750/836242	10
T200	Up	67	GO:0015748	organophosphate ester transport	0.0304878	51/20450	5.44097e-05	0.000526431	0.000429178	819693/820355/829918/836242/844074	5
T200	Up	67	GO:0015802	basic amino acid transport	0.0243902	27/20450	6.05939e-05	0.000572579	0.000466801	820355/829918/836242/844074	4
T200	Up	67	GO:0071396	cellular response to lipid	0.0731707	381/20450	6.07165e-05	0.000572579	0.000466801	815147/819280/820355/823706/828053/829623/832285/834210/836655/837276/839666/839748	12
T200	Up	67	GO:0010120	camalexin biosynthetic process	0.0182927	11/20450	7.97006e-05	0.000733048	0.000597625	818429/823706/824807	3
T200	Up	67	GO:0052317	camalexin metabolic process	0.0182927	11/20450	7.97006e-05	0.000733048	0.000597625	818429/823706/824807	3
T200	Up	67	GO:0009403	toxin biosynthetic process	0.0182927	12/20450	0.000105642	0.000907335	0.000739714	818429/823706/824807	3
T200	Up	67	GO:0009700	indole phytoalexin biosynthetic process	0.0182927	12/20450	0.000105642	0.000907335	0.000739714	818429/823706/824807	3
T200	Up	67	GO:0046217	indole phytoalexin metabolic process	0.0182927	12/20450	0.000105642	0.000907335	0.000739714	818429/823706/824807	3
T200	Up	67	GO:0052314	phytoalexin metabolic process	0.0182927	12/20450	0.000105642	0.000907335	0.000739714	818429/823706/824807	3
T200	Up	67	GO:0052315	phytoalexin biosynthetic process	0.0182927	12/20450	0.000105642	0.000907335	0.000739714	818429/823706/824807	3
T200	Up	67	GO:0015696	ammonium transport	0.0243902	31/20450	0.000105957	0.000907335	0.000739714	820355/829918/836242/844074	4
T200	Up	67	GO:0017000	antibiotic biosynthetic process	0.0609756	288/20450	0.000114526	0.000969563	0.000790446	815147/818429/820355/820924/823706/824807/828481/829918/832750/836242	10
T200	Up	67	GO:0034976	response to endoplasmic reticulum stress	0.0670732	357/20450	0.000149861	0.00125445	0.0010227	815147/818605/820355/828053/829918/830934/834210/834244/836242/837276/839748	11
T200	Up	67	GO:0006979	response to oxidative stress	0.0792683	485/20450	0.000151677	0.00125555	0.0010236	818588/819244/823706/827463/828053/828481/829623/834244/836437/837252/837253/839666/842198	13
T200	Up	67	GO:0001666	response to hypoxia	0.0365854	100/20450	0.00015535	0.00127182	0.00103686	819721/823706/824807/829807/832750/833998	6
T200	Up	67	GO:0036293	response to decreased oxygen levels	0.0365854	103/20450	0.000182697	0.00147944	0.00120613	819721/823706/824807/829807/832750/833998	6
T200	Up	67	GO:0070482	response to oxygen levels	0.0365854	104/20450	0.000192611	0.0015297	0.0012471	819721/823706/824807/829807/832750/833998	6
T200	Up	67	GO:0006972	hyperosmotic response	0.054878	250/20450	0.000193009	0.0015297	0.0012471	815147/818694/818741/819280/820355/829623/832530/839666/839748	9
T200	Up	67	GO:0009694	jasmonic acid metabolic process	0.0426829	158/20450	0.000290397	0.00227732	0.00185661	819244/828540/829623/836242/839666/839748/843500	7
T200	Up	67	GO:0009414	response to water deprivation	0.0670732	418/20450	0.000572565	0.00444334	0.00362248	815147/818429/818741/819280/820355/823815/828053/829623/832530/839666/839748	11
T200	Up	67	GO:0031349	positive regulation of defense response	0.0243902	49/20450	0.000637811	0.00489865	0.00399367	817746/819244/820752/824807	4
T200	Up	67	GO:0009415	response to water	0.0670732	426/20450	0.000669449	0.00508918	0.004149	815147/818429/818741/819280/820355/823815/828053/829623/832530/839666/839748	11
T200	Up	67	GO:0009682	induced systemic resistance	0.0182927	22/20450	0.000697165	0.00524634	0.00427713	819244/820752/824807	3
T200	Up	67	GO:0015711	organic anion transport	0.054878	302/20450	0.000762229	0.00567861	0.00462954	819693/820355/822740/824944/828540/829918/836242/842745/844074	9
T200	Up	67	GO:0009695	jasmonic acid biosynthetic process	0.0365854	135/20450	0.000777941	0.00573828	0.00467819	828540/829623/836242/839666/839748/843500	6
T200	Up	67	GO:0006865	amino acid transport	0.0487805	255/20450	0.00107548	0.00785519	0.00640402	820355/822740/824944/828540/829918/836242/842745/844074	8
T200	Up	67	GO:0048584	positive regulation of response to stimulus	0.0304878	101/20450	0.0013302	0.00962133	0.00784388	817746/819244/820752/823706/824807	5
T200	Up	67	GO:0009963	positive regulation of flavonoid biosynthetic process	0.0304878	103/20450	0.00145143	0.0103972	0.00847644	815147/820355/829466/833550/838456	5
T200	Up	67	GO:0015849	organic acid transport	0.0487805	280/20450	0.00194126	0.0136438	0.0111232	820355/822740/824944/828540/829918/836242/842745/844074	8
T200	Up	67	GO:0046942	carboxylic acid transport	0.0487805	280/20450	0.00194126	0.0136438	0.0111232	820355/822740/824944/828540/829918/836242/842745/844074	8
T200	Up	67	GO:0002218	activation of innate immune response	0.0182927	34/20450	0.00252473	0.017416	0.0141985	819244/820752/824807	3
T200	Up	67	GO:0002253	activation of immune response	0.0182927	34/20450	0.00252473	0.017416	0.0141985	819244/820752/824807	3
T200	Up	67	GO:0009816	defense response to bacterium, incompatible interaction	0.0182927	35/20450	0.0027453	0.0187637	0.0152973	818588/828481/832750	3
T200	Up	67	GO:0043090	amino acid import	0.0243902	74/20450	0.00296667	0.0199834	0.0162917	820355/829918/836242/844074	4
T200	Up	67	GO:0010193	response to ozone	0.0182927	36/20450	0.00297739	0.0199834	0.0162917	819244/828481/834244	3
T200	Up	67	GO:0009962	regulation of flavonoid biosynthetic process	0.0304878	122/20450	0.00304388	0.0202472	0.0165067	815147/820355/829466/833550/838456	5
T200	Up	67	GO:0006470	protein dephosphorylation	0.0365854	180/20450	0.00335163	0.0220799	0.0180008	820355/823706/824807/834790/836211/839748	6
T200	Up	67	GO:0015931	nucleobase-containing compound transport	0.0304878	125/20450	0.00337866	0.0220799	0.0180008	819693/820355/829918/836242/844074	5
T200	Up	67	GO:0009861	jasmonic acid and ethylene-dependent systemic resistance	0.0121951	12/20450	0.00400199	0.025926	0.0211364	819244/820429	2
T200	Up	67	GO:0000302	response to reactive oxygen species	0.0487805	318/20450	0.0042183	0.0270917	0.0220868	819244/827463/828053/828481/834244/836437/837253/842198	8
T200	Up	67	GO:0010286	heat acclimation	0.0243902	84/20450	0.00467724	0.0297041	0.0242165	818429/818627/830934/834244	4
T200	Up	67	GO:0006596	polyamine biosynthetic process	0.0121951	13/20450	0.00470481	0.0297041	0.0242165	821214/829623	2
T200	Up	67	GO:0045089	positive regulation of innate immune response	0.0182927	44/20450	0.00527054	0.0328935	0.0268168	819244/820752/824807	3
T200	Up	67	GO:0035304	regulation of protein dephosphorylation	0.0304878	139/20450	0.00529829	0.0328935	0.0268168	820355/823706/824807/836211/839748	5
T200	Up	67	GO:0035303	regulation of dephosphorylation	0.0304878	140/20450	0.0054597	0.0336155	0.0274054	820355/823706/824807/836211/839748	5
T200	Up	67	GO:0006888	ER to Golgi vesicle-mediated transport	0.0243902	89/20450	0.00573924	0.035047	0.0285724	820355/829918/836242/844074	4
T200	Up	67	GO:0002684	positive regulation of immune system process	0.0182927	46/20450	0.00597093	0.0358738	0.0292464	819244/820752/824807	3
T200	Up	67	GO:0050778	positive regulation of immune response	0.0182927	46/20450	0.00597093	0.0358738	0.0292464	819244/820752/824807	3
T200	Up	67	GO:0016311	dephosphorylation	0.0365854	206/20450	0.00642786	0.03831	0.0312326	820355/823706/824807/834790/836211/839748	6
T200	Up	67	GO:2001057	reactive nitrogen species metabolic process	0.0121951	16/20450	0.00712494	0.0421276	0.0343449	835427/842958	2
T200	Up	67	GO:0043269	regulation of ion transport	0.0304878	150/20450	0.00726962	0.0426446	0.0347664	820355/829567/829918/836242/844074	5
T200	Up	67	GO:0032879	regulation of localization	0.0365854	213/20450	0.00752453	0.0437951	0.0357044	818741/820355/829567/829918/836242/844074	6

## Sheet: TME3_12
TME3 at 12 dpi. Enriched (adjusted p value <1E-08) GOs highlighted in green are represented in the heat map (figure 8)
Plant	Expression	Timepoint	ID	Description	Ratio	BgRatio	pvalue	p.adjust	qvalue	geneID	Count
TME3	Down	12	GO:0010200	response to chitin	0.194969	421/20450	1.47061e-21	1.17061e-18	9.79893e-19	816913/818166/818409/818588/818605/819260/820355/820924/821402/823815/824608/825399/826812/827435/828516/828559/829536/829880/831854/832285/834836/836074/837428/838456/838501/839265/839666/843584/844163/28719408/28720712	31
TME3	Down	12	GO:0010243	response to organonitrogen compound	0.194969	443/20450	6.59332e-21	2.62414e-18	2.19662e-18	816913/818166/818409/818588/818605/819260/820355/820924/821402/823815/824608/825399/826812/827435/828516/828559/829536/829880/831854/832285/834836/836074/837428/838456/838501/839265/839666/843584/844163/28719408/28720712	31
TME3	Down	12	GO:0009611	response to wounding	0.125786	335/20450	1.76353e-12	4.67924e-10	3.9169e-10	816913/817553/819260/820355/820924/823815/826618/828540/828559/837071/837428/838456/838501/839265/839666/839748/843584/843982/844002/28719408	20
TME3	Down	12	GO:0008219	cell death	0.144654	496/20450	6.28392e-12	1.2505e-09	1.04677e-09	814657/817746/818166/818409/818605/818705/819260/819889/820355/820771/820924/821356/824608/827435/828229/829536/837276/837428/838456/838501/839748/839808/844074	23
TME3	Down	12	GO:0009692	ethylene metabolic process	0.0754717	119/20450	1.48815e-10	1.18456e-08	9.91575e-09	816913/818705/823815/827435/828540/828559/832285/834244/834836/836074/839748/28720712	12
TME3	Down	12	GO:0009693	ethylene biosynthetic process	0.0754717	119/20450	1.48815e-10	1.18456e-08	9.91575e-09	816913/818705/823815/827435/828540/828559/832285/834244/834836/836074/839748/28720712	12
TME3	Down	12	GO:0043449	cellular alkene metabolic process	0.0754717	119/20450	1.48815e-10	1.18456e-08	9.91575e-09	816913/818705/823815/827435/828540/828559/832285/834244/834836/836074/839748/28720712	12
TME3	Down	12	GO:0043450	alkene biosynthetic process	0.0754717	119/20450	1.48815e-10	1.18456e-08	9.91575e-09	816913/818705/823815/827435/828540/828559/832285/834244/834836/836074/839748/28720712	12
TME3	Down	12	GO:1900673	olefin metabolic process	0.0754717	119/20450	1.48815e-10	1.18456e-08	9.91575e-09	816913/818705/823815/827435/828540/828559/832285/834244/834836/836074/839748/28720712	12
TME3	Down	12	GO:1900674	olefin biosynthetic process	0.0754717	119/20450	1.48815e-10	1.18456e-08	9.91575e-09	816913/818705/823815/827435/828540/828559/832285/834244/834836/836074/839748/28720712	12
TME3	Down	12	GO:0035556	intracellular signal transduction	0.132075	495/20450	2.87704e-10	2.08193e-08	1.74274e-08	818166/818409/818605/819260/820355/820924/822462/823815/827435/832285/833930/835956/836074/836412/836843/837276/838501/839666/839748/843584/28719408	21
TME3	Down	12	GO:0009626	plant-type hypersensitive response	0.119497	400/20450	3.3078e-10	2.11214e-08	1.76803e-08	818166/818409/818605/819260/819889/820355/820771/820924/821356/824608/827435/829536/837276/837428/838456/838501/839748/839808/844074	19
TME3	Down	12	GO:0034050	host programmed cell death induced by symbiont	0.119497	401/20450	3.44948e-10	2.11214e-08	1.76803e-08	818166/818409/818605/819260/819889/820355/820771/820924/821356/824608/827435/829536/837276/837428/838456/838501/839748/839808/844074	19
TME3	Down	12	GO:0012501	programmed cell death	0.119497	448/20450	2.17513e-09	1.07934e-07	9.03492e-08	818166/818409/818605/819260/819889/820355/820771/820924/821356/824608/827435/829536/837276/837428/838456/838501/839748/839808/844074	19
TME3	Down	12	GO:0030968	endoplasmic reticulum unfolded protein response	0.081761	185/20450	2.26954e-09	1.07934e-07	9.03492e-08	818409/818605/819260/820355/822462/829536/834244/836074/837276/838501/839748/5007686/28719408	13
TME3	Down	12	GO:0006986	response to unfolded protein	0.081761	187/20450	2.58766e-09	1.07934e-07	9.03492e-08	818409/818605/819260/820355/822462/829536/834244/836074/837276/838501/839748/5007686/28719408	13
TME3	Down	12	GO:0034620	cellular response to unfolded protein	0.081761	187/20450	2.58766e-09	1.07934e-07	9.03492e-08	818409/818605/819260/820355/822462/829536/834244/836074/837276/838501/839748/5007686/28719408	13
TME3	Down	12	GO:0035967	cellular response to topologically incorrect protein	0.081761	187/20450	2.58766e-09	1.07934e-07	9.03492e-08	818409/818605/819260/820355/822462/829536/834244/836074/837276/838501/839748/5007686/28719408	13
TME3	Down	12	GO:0002679	respiratory burst involved in defense response	0.0691824	121/20450	2.7119e-09	1.07934e-07	9.03492e-08	818166/818605/819260/820355/820924/823815/824608/827435/832285/836074/839666	11
TME3	Down	12	GO:0045730	respiratory burst	0.0691824	121/20450	2.7119e-09	1.07934e-07	9.03492e-08	818166/818605/819260/820355/820924/823815/824608/827435/832285/836074/839666	11
TME3	Down	12	GO:0071396	cellular response to lipid	0.106918	381/20450	7.61416e-09	2.88613e-07	2.41592e-07	817553/818409/819260/820355/821251/822462/832285/835956/836843/837276/838501/839265/839666/839748/842953/843513/28719408	17
TME3	Down	12	GO:0009738	abscisic acid-activated signaling pathway	0.0880503	248/20450	9.10185e-09	3.29322e-07	2.75669e-07	817553/818409/819260/820355/822462/832285/835956/836843/837276/838501/839265/839666/839748/28719408	14
TME3	Down	12	GO:0010941	regulation of cell death	0.106918	404/20450	1.80767e-08	6.09769e-07	5.10425e-07	817746/818166/818409/818605/819260/820355/820771/820924/821356/827435/829536/837276/837428/838456/838501/839748/844074	17
TME3	Down	12	GO:0071215	cellular response to abscisic acid stimulus	0.0880503	263/20450	1.9151e-08	6.09769e-07	5.10425e-07	817553/818409/819260/820355/822462/832285/835956/836843/837276/838501/839265/839666/839748/28719408	14
TME3	Down	12	GO:0097306	cellular response to alcohol	0.0880503	263/20450	1.9151e-08	6.09769e-07	5.10425e-07	817553/818409/819260/820355/822462/832285/835956/836843/837276/838501/839265/839666/839748/28719408	14
TME3	Down	12	GO:0010363	regulation of plant-type hypersensitive response	0.100629	371/20450	3.46029e-08	1.05938e-06	8.86787e-07	818166/818409/818605/819260/820355/820771/820924/821356/827435/829536/837276/837428/838456/838501/839748/844074	16
TME3	Down	12	GO:0006612	protein targeting to membrane	0.100629	374/20450	3.86869e-08	1.14055e-06	9.5473e-07	818166/818409/818605/819260/820355/820771/820924/821356/827435/829536/837276/837428/838456/838501/839748/844074	16
TME3	Down	12	GO:0072657	protein localization to membrane	0.100629	377/20450	4.32066e-08	1.18595e-06	9.92731e-07	818166/818409/818605/819260/820355/820771/820924/821356/827435/829536/837276/837428/838456/838501/839748/844074	16
TME3	Down	12	GO:0090150	establishment of protein localization to membrane	0.100629	377/20450	4.32066e-08	1.18595e-06	9.92731e-07	818166/818409/818605/819260/820355/820771/820924/821356/827435/829536/837276/837428/838456/838501/839748/844074	16
TME3	Down	12	GO:0080135	regulation of cellular response to stress	0.100629	385/20450	5.7715e-08	1.53137e-06	1.28188e-06	818166/818409/818605/819260/820355/820771/820924/821356/827435/829536/837276/837428/838456/838501/839748/844074	16
TME3	Down	12	GO:0043069	negative regulation of programmed cell death	0.0691824	168/20450	8.38165e-08	2.11284e-06	1.76861e-06	818166/818409/818605/819260/820355/829536/837276/837428/838501/839748/844074	11
TME3	Down	12	GO:0043067	regulation of programmed cell death	0.100629	396/20450	8.49381e-08	2.11284e-06	1.76861e-06	818166/818409/818605/819260/820355/820771/820924/821356/827435/829536/837276/837428/838456/838501/839748/844074	16
TME3	Down	12	GO:0050832	defense response to fungus	0.0943396	350/20450	1.02825e-07	2.48027e-06	2.07619e-06	816913/817553/818166/818409/818506/818605/819260/820355/820924/837071/837276/838501/839748/839808/28720712	15
TME3	Down	12	GO:0060548	negative regulation of cell death	0.0691824	172/20450	1.06569e-07	2.49497e-06	2.08849e-06	818166/818409/818605/819260/820355/829536/837276/837428/838501/839748/844074	11
TME3	Down	12	GO:0034976	response to endoplasmic reticulum stress	0.0943396	357/20450	1.32883e-07	3.02215e-06	2.52978e-06	818409/818506/818605/819260/820355/820438/822462/829536/834244/836074/837276/838501/839748/5007686/28719408	15
TME3	Down	12	GO:0009414	response to water deprivation	0.100629	418/20450	1.7713e-07	3.83211e-06	3.20779e-06	816293/818166/818741/819260/820355/820428/820443/823815/836074/836843/837071/838501/839265/839666/839748/5007686	16
TME3	Down	12	GO:0009753	response to jasmonic acid	0.106918	474/20450	1.8069e-07	3.83211e-06	3.20779e-06	818166/818409/819260/820355/820924/821251/827435/828540/829880/837276/838501/839265/839666/839748/842953/843584/28719408	17
TME3	Down	12	GO:0045088	regulation of innate immune response	0.100629	419/20450	1.8294e-07	3.83211e-06	3.20779e-06	818166/818409/818605/819260/820355/820771/820924/821356/827435/829536/837276/837428/838456/838501/839748/844074	16
TME3	Down	12	GO:0050776	regulation of immune response	0.100629	421/20450	1.95083e-07	3.9817e-06	3.333e-06	818166/818409/818605/819260/820355/820771/820924/821356/827435/829536/837276/837428/838456/838501/839748/844074	16
TME3	Down	12	GO:0002682	regulation of immune system process	0.100629	424/20450	2.14675e-07	4.27203e-06	3.57603e-06	818166/818409/818605/819260/820355/820771/820924/821356/827435/829536/837276/837428/838456/838501/839748/844074	16
TME3	Down	12	GO:0009415	response to water	0.100629	426/20450	2.28711e-07	4.44035e-06	3.71693e-06	816293/818166/818741/819260/820355/820428/820443/823815/836074/836843/837071/838501/839265/839666/839748/5007686	16
TME3	Down	12	GO:0009612	response to mechanical stimulus	0.0440252	63/20450	5.77677e-07	1.09484e-05	9.16465e-06	816913/820924/823815/828559/837428/838456/839666	7
TME3	Down	12	GO:0006972	hyperosmotic response	0.0754717	250/20450	6.23491e-07	1.15418e-05	9.66144e-06	818741/819260/820355/820428/821251/830336/836843/838501/839265/839666/839748/842953	12
TME3	Down	12	GO:0009723	response to ethylene	0.0880503	353/20450	7.08832e-07	1.28234e-05	1.07342e-05	820355/821251/823815/827435/829880/832285/836074/836843/838501/839666/839748/842953/843393/843584	14
TME3	Down	12	GO:0051865	protein autoubiquitination	0.0251572	11/20450	1.11292e-06	1.96864e-05	1.64791e-05	818166/820443/823815/836074	4
TME3	Down	12	GO:0035966	response to topologically incorrect protein	0.0880503	369/20450	1.19867e-06	2.07422e-05	1.73629e-05	818409/818605/819260/820355/822462/829536/834244/834807/836074/837276/838501/839748/5007686/28719408	14
TME3	Down	12	GO:0002252	immune effector process	0.0754717	279/20450	1.97322e-06	3.34188e-05	2.79742e-05	818166/818605/819260/820355/820924/823815/824608/826385/827435/832285/836074/839666	12
TME3	Down	12	GO:0009751	response to salicylic acid	0.0943396	473/20450	4.49289e-06	7.45071e-05	6.23684e-05	818166/818409/818588/818605/819260/820355/820924/821251/827435/829880/837276/838501/839748/842953/843161	15
TME3	Down	12	GO:0042538	hyperosmotic salinity response	0.0566038	161/20450	4.82218e-06	7.83359e-05	6.55734e-05	819260/820355/821251/836843/838501/839265/839666/839748/842953	9
TME3	Down	12	GO:0035690	cellular response to drug	0.081761	390/20450	1.18175e-05	0.000188135	0.000157484	818166/818409/818605/819260/820355/820924/820985/821251/827435/837276/838501/839748/842953	13
TME3	Down	12	GO:0000160	phosphorelay signal transduction system	0.0503145	138/20450	1.26293e-05	0.000196196	0.000164232	823815/827435/832285/833930/836074/836412/839666/843584	8
TME3	Down	12	GO:0071407	cellular response to organic cyclic compound	0.081761	393/20450	1.28168e-05	0.000196196	0.000164232	818166/818409/818605/819260/820355/820924/821251/827435/837276/838501/839748/842953/843513	13
TME3	Down	12	GO:0009867	jasmonic acid mediated signaling pathway	0.0691824	286/20450	1.53071e-05	0.000225638	0.000188877	818166/818409/819260/820355/820924/821251/827435/837276/838501/839748/842953	11
TME3	Down	12	GO:0071395	cellular response to jasmonic acid stimulus	0.0691824	286/20450	1.53071e-05	0.000225638	0.000188877	818166/818409/819260/820355/820924/821251/827435/837276/838501/839748/842953	11
TME3	Down	12	GO:0009863	salicylic acid mediated signaling pathway	0.0754717	353/20450	2.13448e-05	0.000308918	0.000258589	818166/818409/818605/819260/820355/820924/821251/827435/837276/838501/839748/842953	12
TME3	Down	12	GO:0071446	cellular response to salicylic acid stimulus	0.0754717	355/20450	2.25643e-05	0.000320736	0.000268482	818166/818409/818605/819260/820355/820924/821251/827435/837276/838501/839748/842953	12
TME3	Down	12	GO:0071236	cellular response to antibiotic	0.0754717	364/20450	2.88351e-05	0.00040268	0.000337075	818166/818409/818605/819260/820355/820924/821251/827435/837276/838501/839748/842953	12
TME3	Down	12	GO:0048585	negative regulation of response to stimulus	0.0754717	367/20450	3.1238e-05	0.000428715	0.000358869	818166/818409/819260/820355/820924/821251/828957/837276/838501/839265/839748/842953	12
TME3	Down	12	GO:0072593	reactive oxygen species metabolic process	0.0754717	374/20450	3.75327e-05	0.000506373	0.000423875	818166/818409/818741/820355/820461/820924/821251/824454/839748/841755/842953/842958	12
TME3	Down	12	GO:0015802	basic amino acid transport	0.0251572	27/20450	5.37144e-05	0.000712611	0.000596513	818409/820355/837428/844074	4
TME3	Down	12	GO:0000165	MAPK cascade	0.0566038	221/20450	5.98178e-05	0.000767983	0.000642863	818166/818409/819260/820355/820924/832285/837276/838501/839748	9
TME3	Down	12	GO:0023014	signal transduction by protein phosphorylation	0.0566038	221/20450	5.98178e-05	0.000767983	0.000642863	818166/818409/819260/820355/820924/832285/837276/838501/839748	9
TME3	Down	12	GO:0042742	defense response to bacterium	0.0754717	398/20450	6.82191e-05	0.000861942	0.000721515	818166/818409/818588/820355/820461/820924/832285/838501/839748/843331/843393/843513	12
TME3	Down	12	GO:0009695	jasmonic acid biosynthetic process	0.0440252	135/20450	9.06043e-05	0.00112689	0.000943298	828540/838501/839265/839666/839748/843584/28719408	7
TME3	Down	12	GO:0015696	ammonium transport	0.0251572	31/20450	9.40006e-05	0.00115115	0.000963601	818409/820355/837428/844074	4
TME3	Down	12	GO:0052542	defense response by callose deposition	0.0314465	63/20450	0.000130341	0.00157199	0.00131588	828516/829536/834244/843584/844163	5
TME3	Down	12	GO:2000377	regulation of reactive oxygen species metabolic process	0.0503145	205/20450	0.000206963	0.00245885	0.00205825	818166/818409/820355/820924/821251/839748/842953/842958	8
TME3	Down	12	GO:0006862	nucleotide transport	0.0251572	39/20450	0.000234126	0.00274066	0.00229415	818409/820355/837428/844074	4
TME3	Down	12	GO:0009694	jasmonic acid metabolic process	0.0440252	158/20450	0.000240432	0.00277368	0.00232179	828540/838501/839265/839666/839748/843584/28719408	7
TME3	Down	12	GO:0043090	amino acid import	0.0314465	74/20450	0.000278906	0.00317156	0.00265485	818409/818506/820355/837428/844074	5
TME3	Down	12	GO:0031348	negative regulation of defense response	0.0566038	277/20450	0.000326883	0.00366477	0.0030677	818166/818409/819260/820355/820924/828957/837276/838501/839748	9
TME3	Down	12	GO:0009642	response to light intensity	0.0566038	283/20450	0.000382181	0.00422523	0.00353685	816293/818588/818741/820438/837071/837428/839666/844245/5007686	9
TME3	Down	12	GO:0009873	ethylene-activated signaling pathway	0.0377358	125/20450	0.000440239	0.00480041	0.00401833	823815/827435/832285/836074/839666/843584	6
TME3	Down	12	GO:0006888	ER to Golgi vesicle-mediated transport	0.0314465	89/20450	0.000654589	0.00702278	0.00587863	818409/818506/820355/837428/844074	5
TME3	Down	12	GO:0015748	organophosphate ester transport	0.0251572	51/20450	0.000661694	0.00702278	0.00587863	818409/820355/837428/844074	4
TME3	Down	12	GO:0009627	systemic acquired resistance	0.0691824	446/20450	0.000753895	0.00789606	0.00660963	818166/818409/818506/819260/820355/820924/828957/837276/837667/838501/839748	11
TME3	Down	12	GO:0009862	systemic acquired resistance, salicylic acid mediated signaling pathway	0.0503145	251/20450	0.00079478	0.00814431	0.00681744	818166/818409/819260/820355/820924/837276/838501/839748	8
TME3	Down	12	GO:0016567	protein ubiquitination	0.0440252	193/20450	0.000798061	0.00814431	0.00681744	818166/820438/820443/821402/823815/836074/839808	7
TME3	Down	12	GO:0006865	amino acid transport	0.0503145	255/20450	0.000880355	0.00887041	0.00742524	818409/818506/820355/824608/828540/837428/838043/844074	8
TME3	Down	12	GO:0071369	cellular response to ethylene stimulus	0.0377358	144/20450	0.000927008	0.00922373	0.007721	823815/827435/832285/836074/839666/843584	6
TME3	Down	12	GO:0052545	callose localization	0.0314465	97/20450	0.000967049	0.00950335	0.00795506	828516/829536/834244/843584/844163	5
TME3	Down	12	GO:0033037	polysaccharide localization	0.0314465	100/20450	0.00110889	0.0107643	0.00901059	828516/829536/834244/843584/844163	5
TME3	Down	12	GO:0042743	hydrogen peroxide metabolic process	0.0566038	334/20450	0.00123975	0.0118897	0.0099526	818166/818409/818741/820355/820461/820924/824454/839748/841755	9
TME3	Down	12	GO:0032446	protein modification by small protein conjugation	0.0440252	213/20450	0.00141406	0.0133999	0.0112168	818166/820438/820443/821402/823815/836074/839808	7
TME3	Down	12	GO:0050801	ion homeostasis	0.0566038	342/20450	0.00145958	0.0136686	0.0114417	820461/820771/827332/828516/835406/841755/842198/842203/843410	9
TME3	Down	12	GO:0015849	organic acid transport	0.0503145	280/20450	0.00159739	0.0146152	0.0122341	818409/818506/820355/824608/828540/837428/838043/844074	8
TME3	Down	12	GO:0046942	carboxylic acid transport	0.0503145	280/20450	0.00159739	0.0146152	0.0122341	818409/818506/820355/824608/828540/837428/838043/844074	8
TME3	Down	12	GO:0055065	metal ion homeostasis	0.0440252	227/20450	0.00203071	0.0183687	0.015376	820771/827332/835406/841755/842198/842203/843410	7
TME3	Down	12	GO:0042744	hydrogen peroxide catabolic process	0.0251572	72/20450	0.00240132	0.021477	0.017978	818741/820461/824454/841755	4
TME3	Down	12	GO:0017001	antibiotic catabolic process	0.0251572	73/20450	0.00252536	0.0223354	0.0186965	818741/820461/824454/841755	4
TME3	Down	12	GO:0015711	organic anion transport	0.0503145	302/20450	0.00255544	0.022353	0.0187113	818409/818506/820355/824608/828540/837428/838043/844074	8
TME3	Down	12	GO:0009646	response to absence of light	0.0188679	37/20450	0.00295199	0.0255411	0.02138	818588/818741/837428	3
TME3	Down	12	GO:0048193	Golgi vesicle transport	0.0503145	310/20450	0.00299816	0.0256617	0.0214809	818409/818506/820355/826812/831693/837276/837428/844074	8
TME3	Down	12	GO:0010325	raffinose family oligosaccharide biosynthetic process	0.0125786	11/20450	0.00315531	0.0267194	0.0223663	821251/842953	2
TME3	Down	12	GO:0048878	chemical homeostasis	0.0566038	386/20450	0.00329395	0.0275599	0.0230699	820461/820771/827332/828516/835406/841755/842198/842203/843410	9
TME3	Down	12	GO:0098771	inorganic ion homeostasis	0.0440252	248/20450	0.00332381	0.0275599	0.0230699	820771/827332/835406/841755/842198/842203/843410	7
TME3	Down	12	GO:0055080	cation homeostasis	0.0503145	318/20450	0.00349858	0.02871	0.0240325	820461/820771/827332/835406/841755/842198/842203/843410	8
TME3	Down	12	GO:0016999	antibiotic metabolic process	0.0628931	470/20450	0.00380413	0.0308988	0.0258648	818166/818409/818741/820355/820461/820924/824454/839748/841755/843206	10
TME3	Down	12	GO:0051187	cofactor catabolic process	0.0314465	136/20450	0.00424278	0.0341137	0.0285559	818741/820461/824454/825280/841755	5
TME3	Down	12	GO:0006979	response to oxidative stress	0.0628931	485/20450	0.00473437	0.0376855	0.0315458	818588/820428/820438/820985/822462/834244/835102/839666/842198/843584	10
TME3	Down	12	GO:0017014	protein nitrosylation	0.0125786	15/20450	0.00590216	0.04606	0.0385559	820461/824454	2
TME3	Down	12	GO:0018119	peptidyl-cysteine S-nitrosylation	0.0125786	15/20450	0.00590216	0.04606	0.0385559	820461/824454	2
TME3	Down	12	GO:0043269	regulation of ion transport	0.0314465	150/20450	0.00639741	0.0494402	0.0413854	818409/820355/837428/844074/844245	5
TME3	Down	12	GO:0032879	regulation of localization	0.0377358	213/20450	0.00650062	0.0495811	0.0415033	818409/818741/820355/837428/844074/844245	6
TME3	Down	12	GO:0009312	oligosaccharide biosynthetic process	0.0188679	49/20450	0.00654022	0.0495811	0.0415033	821251/842953/843410	3
TME3	Down	12	GO:0009937	regulation of gibberellic acid mediated signaling pathway	0.0125786	16/20450	0.00671107	0.0499254	0.0417915	821251/842953	2
TME3	Down	12	GO:0018198	peptidyl-cysteine modification	0.0125786	16/20450	0.00671107	0.0499254	0.0417915	820461/824454	2
TME3	Down	12	GO:0040008	regulation of growth	0.0823529	306/20450	0.000285519	0.0216637	0.0207752	815145/818649/818884/829788/830022/830915/836699	7

## Sheet: TME3_32
TME3 at 32 dpi. Enriched (adjusted p value <1E-08) GOs highlighted in green are represented in the heat map (figure 8)
Plant	Expression	Timepoint	ID	Description	Ratio	BgRatio	pvalue	p.adjust	qvalue	geneID	Count
TME3	Up	32	GO:0009753	response to jasmonic acid	0.291262	474/20450	6.33375e-25	3.96493e-22	2.97353e-22	815160/817295/817586/821055/821904/823650/824807/825297/825476/827377/828053/828849/829880/830443/832214/832524/834210/834273/835821/836464/838122/838314/838501/838639/839265/839545/839893/840158/842428/844423	30
TME3	Up	32	GO:0009694	jasmonic acid metabolic process	0.174757	158/20450	1.11821e-19	3.5e-17	2.62486e-17	815160/817586/821055/821904/823650/829022/830443/834273/835821/836464/838314/838501/838639/839265/839545/839893/840158/844423	18
TME3	Up	32	GO:0009611	response to wounding	0.213592	335/20450	1.19284e-18	2.48907e-16	1.8667e-16	815160/817586/821055/821904/823650/827377/828053/828849/830443/832214/834273/836464/838314/838501/838639/839265/839893/840158/842428/843685/843982/844423	22
TME3	Up	32	GO:0009695	jasmonic acid biosynthetic process	0.145631	135/20450	2.21832e-16	3.47167e-14	2.60361e-14	815160/817586/821055/821904/823650/829022/830443/834273/838314/838501/838639/839265/839893/840158/844423	15
TME3	Up	32	GO:0009867	jasmonic acid mediated signaling pathway	0.165049	286/20450	7.27271e-14	7.58786e-12	5.69058e-12	815160/817295/821055/821904/824807/825476/828053/830443/832214/832524/834210/834273/838122/838501/839893/840158/844423	17
TME3	Up	32	GO:0071395	cellular response to jasmonic acid stimulus	0.165049	286/20450	7.27271e-14	7.58786e-12	5.69058e-12	815160/817295/821055/821904/824807/825476/828053/830443/832214/832524/834210/834273/838122/838501/839893/840158/844423	17
TME3	Up	32	GO:0009738	abscisic acid-activated signaling pathway	0.15534	248/20450	1.18384e-13	1.05869e-11	7.93976e-12	815160/817586/821904/824761/825476/827464/828053/828849/832662/834210/836843/838122/838501/839265/840158/844423	16
TME3	Up	32	GO:0009723	response to ethylene	0.174757	353/20450	1.74179e-13	1.36295e-11	1.02216e-11	815160/817087/817586/821891/821904/824761/825476/827464/828849/829880/829891/832662/836843/838122/838501/839143/843685/844423	18
TME3	Up	32	GO:0071215	cellular response to abscisic acid stimulus	0.15534	263/20450	2.93426e-13	1.73776e-11	1.30325e-11	815160/817586/821904/824761/825476/827464/828053/828849/832662/834210/836843/838122/838501/839265/840158/844423	16
TME3	Up	32	GO:0097306	cellular response to alcohol	0.15534	263/20450	2.93426e-13	1.73776e-11	1.30325e-11	815160/817586/821904/824761/825476/827464/828053/828849/832662/834210/836843/838122/838501/839265/840158/844423	16
TME3	Up	32	GO:0010200	response to chitin	0.184466	421/20450	3.05358e-13	1.73776e-11	1.30325e-11	814962/818588/821904/824608/824807/827464/829880/832524/832662/834273/838122/838314/838501/838639/839265/840158/842428/843685/844423	19
TME3	Up	32	GO:0071396	cellular response to lipid	0.174757	381/20450	6.35893e-13	3.31724e-11	2.48779e-11	815160/817586/819014/821904/824761/825476/827464/828053/828849/830708/832662/834210/836843/838122/838501/839265/840158/844423	18
TME3	Up	32	GO:0010243	response to organonitrogen compound	0.184466	443/20450	7.51944e-13	3.6209e-11	2.71552e-11	814962/818588/821904/824608/824807/827464/829880/832524/832662/834273/838122/838314/838501/838639/839265/840158/842428/843685/844423	19
TME3	Up	32	GO:0035556	intracellular signal transduction	0.184466	495/20450	5.25144e-12	2.34815e-10	1.76101e-10	817087/817586/821891/821904/824761/824807/825476/827464/828053/832524/832662/834210/834273/836843/838122/838501/839143/843685/844423	19
TME3	Up	32	GO:0009626	plant-type hypersensitive response	0.165049	400/20450	1.585e-11	6.44979e-10	4.83707e-10	817295/824608/824761/824807/825476/828053/829466/832214/832524/832662/833550/834210/834273/838122/838501/840158/844423	17
TME3	Up	32	GO:0034050	host programmed cell death induced by symbiont	0.165049	401/20450	1.64851e-11	6.44979e-10	4.83707e-10	817295/824608/824761/824807/825476/828053/829466/832214/832524/832662/833550/834210/834273/838122/838501/840158/844423	17
TME3	Up	32	GO:0010941	regulation of cell death	0.165049	404/20450	1.85348e-11	6.82518e-10	5.1186e-10	817295/817746/824761/824807/825476/828053/829466/832214/832524/832662/833550/834210/834273/838122/838501/840158/844423	17
TME3	Up	32	GO:0008219	cell death	0.174757	496/20450	5.09156e-11	1.76035e-09	1.32019e-09	817295/817746/824608/824761/824807/825476/828053/829466/832214/832524/832662/833550/834210/834273/838122/838501/840158/844423	18
TME3	Up	32	GO:0010363	regulation of plant-type hypersensitive response	0.15534	371/20450	5.34291e-11	1.76035e-09	1.32019e-09	817295/824761/824807/825476/828053/829466/832214/832524/832662/833550/834210/834273/838122/838501/840158/844423	16
TME3	Up	32	GO:0006612	protein targeting to membrane	0.15534	374/20450	6.02019e-11	1.88432e-09	1.41316e-09	817295/824761/824807/825476/828053/829466/832214/832524/832662/833550/834210/834273/838122/838501/840158/844423	16
TME3	Up	32	GO:0072657	protein localization to membrane	0.15534	377/20450	6.77605e-11	1.92809e-09	1.44599e-09	817295/824761/824807/825476/828053/829466/832214/832524/832662/833550/834210/834273/838122/838501/840158/844423	16
TME3	Up	32	GO:0090150	establishment of protein localization to membrane	0.15534	377/20450	6.77605e-11	1.92809e-09	1.44599e-09	817295/824761/824807/825476/828053/829466/832214/832524/832662/833550/834210/834273/838122/838501/840158/844423	16
TME3	Up	32	GO:0080135	regulation of cellular response to stress	0.15534	385/20450	9.24124e-11	2.4277e-09	1.82067e-09	817295/824761/824807/825476/828053/829466/832214/832524/832662/833550/834210/834273/838122/838501/840158/844423	16
TME3	Up	32	GO:0012501	programmed cell death	0.165049	448/20450	9.30747e-11	2.4277e-09	1.82067e-09	817295/824608/824761/824807/825476/828053/829466/832214/832524/832662/833550/834210/834273/838122/838501/840158/844423	17
TME3	Up	32	GO:0043067	regulation of programmed cell death	0.15534	396/20450	1.39939e-10	3.50407e-09	2.62791e-09	817295/824761/824807/825476/828053/829466/832214/832524/832662/833550/834210/834273/838122/838501/840158/844423	16
TME3	Up	32	GO:0045088	regulation of innate immune response	0.15534	419/20450	3.19932e-10	7.70297e-09	5.7769e-09	817295/824761/824807/825476/828053/829466/832214/832524/832662/833550/834210/834273/838122/838501/840158/844423	16
TME3	Up	32	GO:0050776	regulation of immune response	0.15534	421/20450	3.42942e-10	7.95117e-09	5.96305e-09	817295/824761/824807/825476/828053/829466/832214/832524/832662/833550/834210/834273/838122/838501/840158/844423	16
TME3	Up	32	GO:0002682	regulation of immune system process	0.15534	424/20450	3.80331e-10	8.50311e-09	6.37697e-09	817295/824761/824807/825476/828053/829466/832214/832524/832662/833550/834210/834273/838122/838501/840158/844423	16
TME3	Up	32	GO:0048585	negative regulation of response to stimulus	0.145631	367/20450	4.73424e-10	1.02194e-08	7.66415e-09	817087/821891/824807/825476/828053/828957/829466/832524/833550/834210/834273/838122/838501/839265/844423	15
TME3	Up	32	GO:0009751	response to salicylic acid	0.15534	473/20450	1.84727e-09	3.85464e-08	2.89081e-08	817295/818588/824807/825297/825476/828053/829880/832524/833550/834210/834273/838122/838501/840158/842428/844423	16
TME3	Up	32	GO:0042538	hyperosmotic salinity response	0.0970874	161/20450	8.6934e-09	1.75551e-07	1.31656e-07	815160/821904/825476/827464/828849/836843/838122/838501/839265/844356	10
TME3	Up	32	GO:0071407	cellular response to organic cyclic compound	0.135922	393/20450	1.08614e-08	2.12476e-07	1.59348e-07	817295/819014/824807/825476/828053/830708/832524/833550/834210/834273/838122/838501/840158/844423	14
TME3	Up	32	GO:0043069	negative regulation of programmed cell death	0.0970874	168/20450	1.30818e-08	2.48158e-07	1.86108e-07	824761/824807/825476/828053/832662/834210/838122/838501/840158/844423	10
TME3	Up	32	GO:0031348	negative regulation of defense response	0.116505	277/20450	1.53865e-08	2.83292e-07	2.12457e-07	824807/825476/828053/828957/829466/832524/833550/834210/834273/838122/838501/844423	12
TME3	Up	32	GO:0060548	negative regulation of cell death	0.0970874	172/20450	1.63856e-08	2.93067e-07	2.19788e-07	824761/824807/825476/828053/832662/834210/838122/838501/840158/844423	10
TME3	Up	32	GO:0009414	response to water deprivation	0.126214	418/20450	1.82621e-07	3.17558e-06	2.38155e-06	815160/821904/823650/825476/827464/828053/828849/836843/838122/838501/839265/840158/844356	13
TME3	Up	32	GO:0009863	salicylic acid mediated signaling pathway	0.116505	353/20450	2.17185e-07	3.61123e-06	2.70827e-06	817295/824807/825476/828053/832524/833550/834210/834273/838122/838501/840158/844423	12
TME3	Up	32	GO:0009415	response to water	0.126214	426/20450	2.26868e-07	3.61123e-06	2.70827e-06	815160/821904/823650/825476/827464/828053/828849/836843/838122/838501/839265/840158/844356	13
TME3	Up	32	GO:0009873	ethylene-activated signaling pathway	0.0776699	125/20450	2.2749e-07	3.61123e-06	2.70827e-06	817087/821891/821904/825476/827464/839143/843685/844423	8
TME3	Up	32	GO:0071446	cellular response to salicylic acid stimulus	0.116505	355/20450	2.3075e-07	3.61123e-06	2.70827e-06	817295/824807/825476/828053/832524/833550/834210/834273/838122/838501/840158/844423	12
TME3	Up	32	GO:0071236	cellular response to antibiotic	0.116505	364/20450	3.01619e-07	4.60521e-06	3.45371e-06	817295/824807/825476/828053/832524/833550/834210/834273/838122/838501/840158/844423	12
TME3	Up	32	GO:0000160	phosphorelay signal transduction system	0.0776699	138/20450	4.86299e-07	7.24817e-06	5.43582e-06	817087/821891/821904/825476/827464/839143/843685/844423	8
TME3	Up	32	GO:0006972	hyperosmotic response	0.0970874	250/20450	5.42687e-07	7.90051e-06	5.92505e-06	815160/821904/825476/827464/828849/836843/838122/838501/839265/844356	10
TME3	Up	32	GO:0009862	systemic acquired resistance, salicylic acid mediated signaling pathway	0.0970874	251/20450	5.62863e-07	8.008e-06	6.00567e-06	824807/825476/828053/832524/833550/834210/834273/838122/838501/844423	10
TME3	Up	32	GO:0035690	cellular response to drug	0.116505	390/20450	6.27435e-07	8.72832e-06	6.54588e-06	817295/824807/825476/828053/832524/833550/834210/834273/838122/838501/840158/844423	12
TME3	Up	32	GO:0071369	cellular response to ethylene stimulus	0.0776699	144/20450	6.72677e-07	9.15426e-06	6.86531e-06	817087/821891/821904/825476/827464/839143/843685/844423	8
TME3	Up	32	GO:0050832	defense response to fungus	0.106796	350/20450	1.54539e-06	2.05833e-05	1.54366e-05	818506/819941/824807/825476/828053/832524/834210/834273/838122/838501/844423	11
TME3	Up	32	GO:0000165	MAPK cascade	0.0873786	221/20450	1.77893e-06	2.27267e-05	1.70441e-05	824807/825476/828053/832524/834210/834273/838122/838501/844423	9
TME3	Up	32	GO:0023014	signal transduction by protein phosphorylation	0.0873786	221/20450	1.77893e-06	2.27267e-05	1.70441e-05	824807/825476/828053/832524/834210/834273/838122/838501/844423	9
TME3	Up	32	GO:0009627	systemic acquired resistance	0.116505	446/20450	2.54296e-06	3.18379e-05	2.38771e-05	818506/824807/825476/828053/828957/832524/833550/834210/834273/838122/838501/844423	12
TME3	Up	32	GO:0002679	respiratory burst involved in defense response	0.0582524	121/20450	3.39222e-05	0.000408372	0.000306262	821904/824608/824807/827464/832662/844423	6
TME3	Up	32	GO:0045730	respiratory burst	0.0582524	121/20450	3.39222e-05	0.000408372	0.000306262	821904/824608/824807/827464/832662/844423	6
TME3	Up	32	GO:0042435	indole-containing compound biosynthetic process	0.0582524	133/20450	5.76459e-05	0.000680874	0.000510627	815160/824807/834273/840158/843685/2746023	6
TME3	Up	32	GO:0043900	regulation of multi-organism process	0.0582524	146/20450	9.66929e-05	0.00112092	0.000840644	824807/832524/834273/838122/840158/844423	6
TME3	Up	32	GO:0042430	indole-containing compound metabolic process	0.0582524	147/20450	0.0001004	0.00114274	0.000857005	815160/824807/834273/840158/843685/2746023	6
TME3	Up	32	GO:0006568	tryptophan metabolic process	0.0485437	96/20450	0.000124944	0.00137219	0.00102908	815160/834273/840158/843685/2746023	5
TME3	Up	32	GO:0006586	indolalkylamine metabolic process	0.0485437	96/20450	0.000124944	0.00137219	0.00102908	815160/834273/840158/843685/2746023	5
TME3	Up	32	GO:0009595	detection of biotic stimulus	0.0485437	104/20450	0.0001821	0.00196543	0.00147399	824807/832524/834273/838122/844423	5
TME3	Up	32	GO:0044106	cellular amine metabolic process	0.0582524	167/20450	0.000201571	0.0021387	0.00160394	815160/834273/840158/843236/843685/2746023	6
TME3	Up	32	GO:0009072	aromatic amino acid family metabolic process	0.0679612	241/20450	0.000219461	0.00228971	0.00171719	815160/823650/834273/840158/843685/844356/2746023	7
TME3	Up	32	GO:0051606	detection of stimulus	0.0485437	144/20450	0.000812793	0.00834113	0.00625549	824807/832524/834273/838122/844423	5
TME3	Up	32	GO:0009646	response to absence of light	0.0291262	37/20450	0.000851313	0.00859552	0.00644628	818588/823888/844423	3
TME3	Up	32	GO:0042742	defense response to bacterium	0.0776699	398/20450	0.000912619	0.00906825	0.0068008	818588/824807/829466/832524/834273/838122/838501/844423	8
TME3	Up	32	GO:0009308	amine metabolic process	0.0582524	229/20450	0.00106965	0.0104625	0.00784646	815160/834273/840158/843236/843685/2746023	6
TME3	Up	32	GO:0006576	cellular biogenic amine metabolic process	0.0485437	157/20450	0.00119642	0.0115224	0.00864135	815160/834273/840158/843685/2746023	5
TME3	Up	32	GO:0009063	cellular amino acid catabolic process	0.0485437	160/20450	0.00130126	0.0123423	0.00925618	815160/823650/823888/834273/843685	5
TME3	Up	32	GO:0010120	camalexin biosynthetic process	0.0194175	11/20450	0.00134141	0.0123489	0.00926114	824807/843685	2
TME3	Up	32	GO:0052317	camalexin metabolic process	0.0194175	11/20450	0.00134141	0.0123489	0.00926114	824807/843685	2
TME3	Up	32	GO:0009625	response to insect	0.0291262	45/20450	0.00151003	0.0132153	0.00991091	824807/827377/833550	3
TME3	Up	32	GO:0009403	toxin biosynthetic process	0.0194175	12/20450	0.00160441	0.0132153	0.00991091	824807/843685	2
TME3	Up	32	GO:0009700	indole phytoalexin biosynthetic process	0.0194175	12/20450	0.00160441	0.0132153	0.00991091	824807/843685	2
TME3	Up	32	GO:0010105	negative regulation of ethylene-activated signaling pathway	0.0194175	12/20450	0.00160441	0.0132153	0.00991091	817087/821891	2
TME3	Up	32	GO:0046217	indole phytoalexin metabolic process	0.0194175	12/20450	0.00160441	0.0132153	0.00991091	824807/843685	2
TME3	Up	32	GO:0052314	phytoalexin metabolic process	0.0194175	12/20450	0.00160441	0.0132153	0.00991091	824807/843685	2
TME3	Up	32	GO:0052315	phytoalexin biosynthetic process	0.0194175	12/20450	0.00160441	0.0132153	0.00991091	824807/843685	2
TME3	Up	32	GO:0070298	negative regulation of phosphorelay signal transduction system	0.0194175	12/20450	0.00160441	0.0132153	0.00991091	817087/821891	2
TME3	Up	32	GO:0048584	positive regulation of response to stimulus	0.038835	101/20450	0.00170444	0.0138569	0.0103921	817746/824807/825476/830708	4
TME3	Up	32	GO:0009963	positive regulation of flavonoid biosynthetic process	0.038835	103/20450	0.00183159	0.0146997	0.0110242	829466/832214/833550/840158	4
TME3	Up	32	GO:0009312	oligosaccharide biosynthetic process	0.0291262	49/20450	0.00193224	0.0153112	0.0114827	825476/837152/838998	3
TME3	Up	32	GO:0042537	benzene-containing compound metabolic process	0.0582524	261/20450	0.00207822	0.016262	0.0121959	824807/832524/834273/838122/844356/844423	6
TME3	Up	32	GO:0042343	indole glucosinolate metabolic process	0.0194175	14/20450	0.00219766	0.0168127	0.0126088	824807/840158	2
TME3	Up	32	GO:0034976	response to endoplasmic reticulum stress	0.0679612	357/20450	0.0022023	0.0168127	0.0126088	818506/825476/828053/832524/834210/838501/844423	7
TME3	Up	32	GO:0030968	endoplasmic reticulum unfolded protein response	0.0485437	185/20450	0.00245754	0.0181078	0.0135801	825476/828053/834210/838501/844423	5
TME3	Up	32	GO:0010310	regulation of hydrogen peroxide metabolic process	0.0485437	186/20450	0.0025155	0.0181078	0.0135801	824807/832524/834273/838122/844423	5
TME3	Up	32	GO:0010104	regulation of ethylene-activated signaling pathway	0.0194175	15/20450	0.00252744	0.0181078	0.0135801	817087/821891	2
TME3	Up	32	GO:0070297	regulation of phosphorelay signal transduction system	0.0194175	15/20450	0.00252744	0.0181078	0.0135801	817087/821891	2
TME3	Up	32	GO:0006986	response to unfolded protein	0.0485437	187/20450	0.00257443	0.0181078	0.0135801	825476/828053/834210/838501/844423	5
TME3	Up	32	GO:0034620	cellular response to unfolded protein	0.0485437	187/20450	0.00257443	0.0181078	0.0135801	825476/828053/834210/838501/844423	5
TME3	Up	32	GO:0035967	cellular response to topologically incorrect protein	0.0485437	187/20450	0.00257443	0.0181078	0.0135801	825476/828053/834210/838501/844423	5
TME3	Up	32	GO:0002252	immune effector process	0.0582524	279/20450	0.00289535	0.0201388	0.0151032	821904/824608/824807/827464/832662/844423	6
TME3	Up	32	GO:0009692	ethylene metabolic process	0.038835	119/20450	0.0030942	0.0201768	0.0151317	838314/839893/842428/843685	4
TME3	Up	32	GO:0009693	ethylene biosynthetic process	0.038835	119/20450	0.0030942	0.0201768	0.0151317	838314/839893/842428/843685	4
TME3	Up	32	GO:0043449	cellular alkene metabolic process	0.038835	119/20450	0.0030942	0.0201768	0.0151317	838314/839893/842428/843685	4
TME3	Up	32	GO:0043450	alkene biosynthetic process	0.038835	119/20450	0.0030942	0.0201768	0.0151317	838314/839893/842428/843685	4
TME3	Up	32	GO:1900673	olefin metabolic process	0.038835	119/20450	0.0030942	0.0201768	0.0151317	838314/839893/842428/843685	4
TME3	Up	32	GO:1900674	olefin biosynthetic process	0.038835	119/20450	0.0030942	0.0201768	0.0151317	838314/839893/842428/843685	4
TME3	Up	32	GO:0016054	organic acid catabolic process	0.0679612	385/20450	0.00334851	0.0213895	0.0160412	815160/818239/823650/823888/829022/834273/843685	7
TME3	Up	32	GO:0046395	carboxylic acid catabolic process	0.0679612	385/20450	0.00334851	0.0213895	0.0160412	815160/818239/823650/823888/829022/834273/843685	7
TME3	Up	32	GO:0009962	regulation of flavonoid biosynthetic process	0.038835	122/20450	0.00338353	0.0213948	0.0160452	829466/832214/833550/840158	4
TME3	Up	32	GO:2000377	regulation of reactive oxygen species metabolic process	0.0485437	205/20450	0.00381529	0.0238837	0.0179118	824807/832524/834273/838122/844423	5
TME3	Up	32	GO:0051193	regulation of cofactor metabolic process	0.0485437	208/20450	0.00405751	0.0251485	0.0188603	824807/832524/834273/838122/844423	5
TME3	Up	32	GO:0009697	salicylic acid biosynthetic process	0.0485437	209/20450	0.00414064	0.0254122	0.0190581	824807/832524/834273/838122/844423	5
TME3	Up	32	GO:0009813	flavonoid biosynthetic process	0.0485437	217/20450	0.00485011	0.0294774	0.0221068	829466/832214/832524/833550/840158	5
TME3	Up	32	GO:0009968	negative regulation of signal transduction	0.0291262	68/20450	0.00490554	0.0295276	0.0221445	817087/821891/839265	3
TME3	Up	32	GO:0010648	negative regulation of cell communication	0.0291262	69/20450	0.00510997	0.0301778	0.022632	817087/821891/839265	3
TME3	Up	32	GO:0023057	negative regulation of signaling	0.0291262	69/20450	0.00510997	0.0301778	0.022632	817087/821891/839265	3
TME3	Up	32	GO:0046189	phenol-containing compound biosynthetic process	0.0485437	221/20450	0.00523548	0.03063	0.0229712	824807/832524/834273/838122/844423	5
TME3	Up	32	GO:0009696	salicylic acid metabolic process	0.0485437	222/20450	0.00533511	0.0309239	0.0231916	824807/832524/834273/838122/844423	5
TME3	Up	32	GO:0005992	trehalose biosynthetic process	0.0194175	22/20450	0.00543423	0.0309257	0.023193	837152/838998	2
TME3	Up	32	GO:0031408	oxylipin biosynthetic process	0.0194175	22/20450	0.00543423	0.0309257	0.023193	823650/834273	2
TME3	Up	32	GO:0009966	regulation of signal transduction	0.038835	140/20450	0.00551323	0.0310926	0.0233182	817087/821891/825476/839265	4
TME3	Up	32	GO:0023051	regulation of signaling	0.038835	142/20450	0.00579434	0.0323862	0.0242883	817087/821891/825476/839265	4
TME3	Up	32	GO:0010646	regulation of cell communication	0.038835	145/20450	0.0062337	0.0345336	0.0258987	817087/821891/825476/839265	4
TME3	Up	32	GO:0031407	oxylipin metabolic process	0.0194175	24/20450	0.00645049	0.0354211	0.0265643	823650/834273	2
TME3	Up	32	GO:0042743	hydrogen peroxide metabolic process	0.0582524	334/20450	0.00689812	0.0375497	0.0281607	824807/832524/834273/838122/841755/844423	6
TME3	Up	32	GO:0005991	trehalose metabolic process	0.0194175	25/20450	0.00698851	0.0377138	0.0282838	837152/838998	2
TME3	Up	32	GO:0018958	phenol-containing compound metabolic process	0.0485437	238/20450	0.00711743	0.0380813	0.0285594	824807/832524/834273/838122/844423	5
TME3	Up	32	GO:0006569	tryptophan catabolic process	0.0291262	79/20450	0.00743843	0.0391299	0.0293458	815160/834273/843685	3
TME3	Up	32	GO:0046218	indolalkylamine catabolic process	0.0291262	79/20450	0.00743843	0.0391299	0.0293458	815160/834273/843685	3
TME3	Up	32	GO:0009812	flavonoid metabolic process	0.0485437	244/20450	0.00788182	0.0411168	0.0308359	829466/832214/832524/833550/840158	5
TME3	Up	32	GO:0042436	indole-containing compound catabolic process	0.0291262	81/20450	0.00796768	0.0412212	0.0309142	815160/834273/843685	3
TME3	Up	32	GO:1902532	negative regulation of intracellular signal transduction	0.0194175	27/20450	0.00812327	0.0416817	0.0312595	817087/821891	2
TME3	Up	32	GO:0009074	aromatic amino acid family catabolic process	0.0291262	83/20450	0.00851861	0.0433003	0.0324734	815160/834273/843685	3
TME3	Up	32	GO:1901606	alpha-amino acid catabolic process	0.038835	159/20450	0.00857706	0.0433003	0.0324734	815160/823650/834273/843685	4
TME3	Up	32	GO:0002831	regulation of response to biotic stimulus	0.0194175	30/20450	0.00996916	0.0499255	0.037442	840158/844423	2

## Sheet: TME3_67
TME3 at 67 dpi. No enriched (adjusted p value <1E-08) biological processes
Plant	Expression	Timepoint	ID	Description	Ratio	BgRatio	pvalue	p.adjust	qvalue	geneID	Count
TME3	Down	67	GO:0006833	water transport	0.0714286	141/20450	0.000122545	0.0354768	0.0312167	820771/825317/827956/828051/837740	5
TME3	Down	67	GO:0042044	fluid transport	0.0714286	141/20450	0.000122545	0.0354768	0.0312167	820771/825317/827956/828051/837740	5
TME3	Up	67	GO:0009072	aromatic amino acid family metabolic process	0.12069	241/20450	5.21616e-06	0.000778537	0.000639025	817879/818470/820651/825524/840158/843750/2746023	7
TME3	Up	67	GO:0006576	cellular biogenic amine metabolic process	0.103448	157/20450	5.41596e-06	0.000778537	0.000639025	818470/820651/820967/840158/843750/2746023	6
TME3	Up	67	GO:0044106	cellular amine metabolic process	0.103448	167/20450	7.72053e-06	0.000778537	0.000639025	818470/820651/820967/840158/843750/2746023	6
TME3	Up	67	GO:0006568	tryptophan metabolic process	0.0862069	96/20450	7.72358e-06	0.000778537	0.000639025	818470/820651/840158/843750/2746023	5
TME3	Up	67	GO:0006586	indolalkylamine metabolic process	0.0862069	96/20450	7.72358e-06	0.000778537	0.000639025	818470/820651/840158/843750/2746023	5
TME3	Up	67	GO:0042435	indole-containing compound biosynthetic process	0.0862069	133/20450	3.74962e-05	0.00314968	0.00258527	818470/820651/840158/843750/2746023	5
TME3	Up	67	GO:0009308	amine metabolic process	0.103448	229/20450	4.59641e-05	0.00330942	0.00271637	818470/820651/820967/840158/843750/2746023	6
TME3	Up	67	GO:0042430	indole-containing compound metabolic process	0.0862069	147/20450	6.04485e-05	0.00380826	0.00312582	818470/820651/840158/843750/2746023	5
TME3	Up	67	GO:0046496	nicotinamide nucleotide metabolic process	0.12069	372/20450	8.43359e-05	0.00454378	0.00372954	816943/817879/821134/825524/837848/842016/843569	7
TME3	Up	67	GO:0019362	pyridine nucleotide metabolic process	0.12069	376/20450	9.01544e-05	0.00454378	0.00372954	816943/817879/821134/825524/837848/842016/843569	7
TME3	Up	67	GO:0072524	pyridine-containing compound metabolic process	0.12069	383/20450	0.000101124	0.00463333	0.00380305	816943/817879/821134/825524/837848/842016/843569	7
TME3	Up	67	GO:0006739	NADP metabolic process	0.0862069	186/20450	0.000182886	0.00744927	0.00611437	816943/817879/821134/825524/842016	5
TME3	Up	67	GO:0006733	oxidoreduction coenzyme metabolic process	0.12069	425/20450	0.000192144	0.00744927	0.00611437	816943/817879/821134/825524/837848/842016/843569	7
TME3	Up	67	GO:0009773	photosynthetic electron transport in photosystem I	0.0517241	46/20450	0.000301377	0.0107162	0.0087959	824379/837848/842016	3
TME3	Up	67	GO:0009310	amine catabolic process	0.0689655	117/20450	0.000340198	0.0107162	0.0087959	818470/820651/820967/843750	4
TME3	Up	67	GO:0042402	cellular biogenic amine catabolic process	0.0689655	117/20450	0.000340198	0.0107162	0.0087959	818470/820651/820967/843750	4
TME3	Up	67	GO:0009850	auxin metabolic process	0.0689655	143/20450	0.000725648	0.0215133	0.0176582	818470/820651/835767/843750	4
TME3	Up	67	GO:0009767	photosynthetic electron transport chain	0.0517241	64/20450	0.000797798	0.0223383	0.0183354	824379/837848/842016	3
TME3	Up	67	GO:0006569	tryptophan catabolic process	0.0517241	79/20450	0.00146935	0.0356936	0.0292974	818470/820651/843750	3
TME3	Up	67	GO:0046218	indolalkylamine catabolic process	0.0517241	79/20450	0.00146935	0.0356936	0.0292974	818470/820651/843750	3
TME3	Up	67	GO:0009624	response to nematode	0.0517241	80/20450	0.00152354	0.0356936	0.0292974	820651/831126/834463	3
TME3	Up	67	GO:0042436	indole-containing compound catabolic process	0.0517241	81/20450	0.00157897	0.0356936	0.0292974	818470/820651/843750	3
TME3	Up	67	GO:0009074	aromatic amino acid family catabolic process	0.0517241	83/20450	0.00169359	0.0356936	0.0292974	818470/820651/843750	3
TME3	Up	67	GO:0006098	pentose-phosphate shunt	0.0689655	182/20450	0.00177052	0.0356936	0.0292974	816943/817879/821134/825524	4
TME3	Up	67	GO:0051156	glucose 6-phosphate metabolic process	0.0689655	182/20450	0.00177052	0.0356936	0.0292974	816943/817879/821134/825524	4
TME3	Up	67	GO:0022900	electron transport chain	0.0517241	88/20450	0.00200255	0.0388186	0.0318624	824379/837848/842016	3
TME3	Up	67	GO:0019682	glyceraldehyde-3-phosphate metabolic process	0.0862069	335/20450	0.00257816	0.0481256	0.0395016	816943/817879/821134/824379/825524	5
TME3	Up	67	GO:0042254	ribosome biogenesis	0.0862069	338/20450	0.00267912	0.0482241	0.0395825	816492/829062/836588/837848/843569	5
TME3	Up	67	GO:0015979	photosynthesis	0.0862069	344/20450	0.00288963	0.0485457	0.0398464	821134/824379/825524/837848/842016	5
TME3	Up	67	GO:0022613	ribonucleoprotein complex biogenesis	0.0862069	344/20450	0.00288963	0.0485457	0.0398464	816492/829062/836588/837848/843569	5
