# Supplementary material for: WRKY Transcription Factors in Cassava Contribute to Regulation of Tolerance and Susceptibility to Cassava Mosaic Disease through Stress Responses
Source: Viruses. 2021 Sep 13;13(9):1820. doi: 10.3390/v13091820 (PMC8473359; doi:10.3390/v13091820)
Supplement: Supplementary file 1 [file viruses-13-01820-s001.zip › Final Supplementary Tables, Figures and Legends/Supplementary Table S3.xlsx]

## Sheet: DE gene partners
Supplementary Table S3 Differentially expressed (DE) interacting gene partners (and their GO functions) associated with Arabidopsis homologs (AtWRKY33 and 53 in T200 and AtWRKY40 and 70 in TME3)
	of upregulated MeWRKY TFs in enriched SA, ET, JA or ABA hormone pathways post-SACMV infection.
T200 12 dpi
	GO function	Arabidopsis homolog ID	Log2 fold change
WRKY33	response to chitin	AT2G38470	2.93383
WRKY53	response to chitin	AT4G23810	3.11448
AT1G23710	response to chitin	AT1G23710	3.22273
ATL2	response to chitin;putative RING-H2	AT3G16720.1	2.60458
T200 32 dpi
WRKY33	MAPK cascade	AT2G38470	3.32012
WRKY33	respiratory burst involved in defense response
WRKY33	protein targeting to membrane
WRKY33	response to water deprivation
WRKY33	detection of biotic stimulus
WRKY33	systemic acquired resistance, salicylic acid mediated signaling pathway
WRKY33	salicylic acid mediated signaling pathway
WRKY33	jasmonic acid mediated signaling pathway
WRKY33	regulation of hydrogen peroxide metabolic process
WRKY33	regulation of plant-type hypersensitive response
WRKY33	response to chitin
WRKY33	negative regulation of defense response
WRKY33	response to chitin
WRKY33	defense response to bacterium
WRKY33	intracellular signal transduction
WRKY33	negative regulation of programmed cell death
WRKY33	regulation of multi-organism process
WRKY33	defense response to fungus
18
WRKY53	MAPK cascade	AT4G23810	3.12648
WRKY53	protein targeting to membrane
WRKY53	detection of biotic stimulus
WRKY53	response to salicylic acid
WRKY53	jasmonic acid mediated signaling pathway
WRKY53	response to chitin
WRKY53	regulation of hydrogen peroxide metabolic process
WRKY53	regulation of plant-type hypersensitive response
WRKY53	negative regulation of defense response
WRKY53	defense response to fungus
WRKY53	systemic acquired resistance, salicylic acid mediated signaling pathway
WRKY53	defense response to bacterium
WRKY53	regulation of multi-organism process
13
ATL2	MAPK cascade	AT3G16720	3.91101
ATL2	respiratory burst involved in defense response
ATL2	protein targeting to membrane
ATL2	response to wounding
ATL2	detection of biotic stimulus
ATL2	regulation of hydrogen peroxide metabolic process
ATL2	response to mechanical stimulus
ATL2	systemic acquired resistance, salicylic acid mediated signaling pathway
ATL2	response to chitin
ATL2	negative regulation of defense response
ATL2	intracellular signal transduction
ATL2	jasmonic acid mediated signaling pathway
ATL2	regulation of plant-type hypersensitive response
ATL2	defense response to bacterium
ATL2	regulation of multi-organism process
ATL2	defense response to fungus
16
MPK3	MAPK cascade	AT3G45640	3.09594
MPK3	response to hypoxia
MPK3	protein targeting to membrane
MPK3	response to oxidative stress
MPK3	detection of biotic stimulus
MPK3	response to wounding
MPK3	systemic acquired resistance, salicylic acid mediated signaling pathway
MPK3	salicylic acid mediated signaling pathway
MPK3	abscisic acid-activated signaling pathway
MPK3	response to chitin
MPK3	regulation of hydrogen peroxide metabolic process
MPK3	jasmonic acid mediated signaling pathway
MPK3	negative regulation of defense response
MPK3	defense response to bacterium
MPK3	intracellular signal transduction
MPK3	negative regulation of programmed cell death
MPK3	response to UV-B
MPK3	defense response to fungus
MPK3	regulation of multi-organism process
MPK3	regulation of plant-type hypersensitive response
20
SYP121	MAPK cascade	AT3G11820	3.60849
SYP121	respiratory burst involved in defense response
SYP121	protein targeting to membrane
SYP121	response to water deprivation
SYP121	detection of biotic stimulus
SYP121	response to wounding
SYP121	abscisic acid-activated signaling pathway
SYP121	response to ethylene
SYP121	response to jasmonic acid
SYP121	systemic acquired resistance, salicylic acid mediated signaling pathway
SYP121	salicylic acid mediated signaling pathway
SYP121	jasmonic acid mediated signaling pathway
SYP121	regulation of hydrogen peroxide metabolic process
SYP121	regulation of plant-type hypersensitive response
SYP121	response to chitin
15
CAF1b	MAPK cascade	AT5G22250	4.15262
CAF1b	respiratory burst involved in defense response
CAF1b	ethylene biosynthetic process
CAF1b	abscisic acid-activated signaling pathway
CAF1b	ethylene-activated signaling pathway
CAF1b	response to chitin
CAF1b	intracellular signal transduction
CAF1b	defense response to bacterium
8
ERF6	respiratory burst involved in defense response	AT4G17490	6.18977
ERF6	response to chitin
ERF6	ethylene-activated signaling pathway
ERF6	intracellular signal transduction
4
AT1G23710	respiratory burst involved in defense response	AT1G23710	3.93519
AT1G23710	response to mechanical stimulus
AT1G23710	ethylene-activated signaling pathway
AT1G23710	response to chitin
AT1G23710	intracellular signal transduction
5
CZF1	respiratory burst involved in defense response	AT2G40140	2.84974
CZF1	protein targeting to membrane
CZF1	salicylic acid mediated signaling pathway
CZF1	response to chitin
CZF1	endoplasmic reticulum unfolded protein response
CZF1	regulation of plant-type hypersensitive response
CZF1	intracellular signal transduction
CZF1	negative regulation of programmed cell death
CZF1	defense response to fungus
9
STZ	respiratory burst involved in defense response	AT1G27730	3.10328
STZ	response to oxidative stress
STZ	response to water deprivation
STZ	response to wounding
STZ	response to mechanical stimulus
STZ	jasmonic acid biosynthetic process
STZ	response to ethylene
STZ	abscisic acid-activated signaling pathway
STZ	response to jasmonic acid
STZ	ethylene-activated signaling pathway
STZ	response to chitin
STZ	intracellular signal transduction
STZ	hyperosmotic salinity response
13
ERF5	respiratory burst involved in defense response	AT5G47230	6.30785
ERF5	ethylene-activated signaling pathway
ERF5	response to chitin
ERF5	intracellular signal transduction
4
AR781	protein targeting to membrane	AT2G26530	2.83481
AR781	response to wounding
AR781	response to mechanical stimulus
AR781	salicylic acid mediated signaling pathway
AR781	response to absence of light
AR781	jasmonic acid mediated signaling pathway
AR781	response to chitin
AR781	regulation of plant-type hypersensitive response
8
TET8	response to wounding	AT2G23810	2.92876
TET8	response to mechanical stimulus
TET8	ethylene biosynthetic process
TET8	response to chitin
TET8	defense response to fungus
5
SYP121	endoplasmic reticulum unfolded protein response	AT3G11820	3.60849
SYP121	negative regulation of defense response
SYP121	hyperosmotic salinity response
SYP121	defense response to bacterium
SYP121	negative regulation of programmed cell death
SYP121	regulation of multi-organism process
SYP121	defense response to fungus
7
T200 67 dpi
WRKY33	MAPK cascade	AT2G38470	2.92518
WRKY33	respiratory burst involved in defense response
WRKY33	protein targeting to membrane
WRKY33	response to water deprivation
WRKY33	detection of biotic stimulus
WRKY33	systemic acquired resistance, salicylic acid mediated signaling pathway
WRKY33	salicylic acid mediated signaling pathway
WRKY33	regulation of hydrogen peroxide metabolic process
WRKY33	jasmonic acid mediated signaling pathway
WRKY33	camalexin biosynthetic process
WRKY33	response to chitin
WRKY33	regulation of plant-type hypersensitive response
WRKY33	intracellular signal transduction
WRKY33	defense response to bacterium
WRKY33	negative regulation of defense response
WRKY33	negative regulation of programmed cell death
WRKY33	defense response to fungus
17
WRKY53	MAPK cascade	AT4G23810	3.50639
WRKY53	protein targeting to membrane
WRKY53	detection of biotic stimulus
WRKY53	response to salicylic acid
WRKY53	jasmonic acid mediated signaling pathway
WRKY53	systemic acquired resistance, salicylic acid mediated signaling pathway
WRKY53	response to chitin
WRKY53	regulation of hydrogen peroxide metabolic process
WRKY53	regulation of plant-type hypersensitive response
WRKY53	negative regulation of defense response
WRKY53	defense response to bacterium
WRKY53	defense response to fungus
12
WRKY70	MAPK cascade	AT3G56400	3.60985
WRKY70	respiratory burst involved in defense response
WRKY70	protein targeting to membrane
WRKY70	detection of biotic stimulus
WRKY70	response to insect
WRKY70	systemic acquired resistance
WRKY70	response to salicylic acid
WRKY70	response to jasmonic acid
WRKY70	systemic acquired resistance, salicylic acid mediated signaling pathway
WRKY70	salicylic acid mediated signaling pathway
WRKY70	jasmonic acid mediated signaling pathway
WRKY70	camalexin biosynthetic process
WRKY70	response to chitin
WRKY70	regulation of hydrogen peroxide metabolic process
WRKY70	regulation of plant-type hypersensitive response
WRKY70	defense response to bacterium
WRKY70	negative regulation of defense response
WRKY70	negative regulation of programmed cell death
WRKY70	regulation of innate immune response
WRKY70	defense response to fungus
20
STZ	MAPK cascade	AT4G34150	3.388
STZ	respiratory burst involved in defense response
STZ	response to oxidative stress
STZ	response to water deprivation
STZ	response to wounding
STZ	response to ethylene
STZ	response to chitin
STZ	intracellular signal transduction
STZ	response to mechanical stimulus
STZ	abscisic acid-activated signaling pathway
STZ	response to jasmonic acid
STZ	ethylene-activated signaling pathway
STZ	hyperosmotic salinity response
13
SYP121	MAPK cascade	AT3G11820	3.06153
SYP121	respiratory burst involved in defense response
SYP121	protein targeting to membrane
SYP121	nucleotide transport
SYP121	response to water deprivation
SYP121	detection of biotic stimulus
SYP121	response to wounding
SYP121	response to insect
SYP121	response to ethylene
SYP121	abscisic acid-activated signaling pathway
SYP121	response to jasmonic acid
SYP121	systemic acquired resistance, salicylic acid mediated signaling pathway
SYP121	salicylic acid mediated signaling pathway
SYP121	jasmonic acid mediated signaling pathway
SYP121	positive regulation of flavonoid biosynthetic process
SYP121	regulation of stomatal movement
SYP121	response to chitin
SYP121	regulation of hydrogen peroxide metabolic process
SYP121	regulation of plant-type hypersensitive response
SYP121	ammonium transport
SYP121	basic amino acid transport
SYP121	endoplasmic reticulum unfolded protein response
SYP121	negative regulation of defense response
SYP121	hyperosmotic salinity response
SYP121	hyperosmotic salinity response
SYP121	defense response to bacterium
SYP121	negative regulation of programmed cell death
SYP121	defense response to fungus
28
MPK3	MAPK cascade	AT3G45640	3.83046
MPK3	protein targeting to membrane
MPK3	response to oxidative stress
MPK3	detection of biotic stimulus
MPK3	response to wounding
MPK3	abscisic acid-activated signaling pathway
MPK3	systemic acquired resistance, salicylic acid mediated signaling pathway
MPK3	salicylic acid mediated signaling pathway
MPK3	jasmonic acid mediated signaling pathway
MPK3	camalexin biosynthetic process
MPK3	response to chitin
MPK3	response to UV-B
MPK3	regulation of hydrogen peroxide metabolic process
MPK3	regulation of plant-type hypersensitive response
MPK3	intracellular signal transduction
MPK3	negative regulation of defense response
MPK3	defense response to bacterium
MPK3	negative regulation of programmed cell death
MPK3	defense response to fungus
MPK3	regulation of stomatal complex development
20
ATL2	MAPK cascade	AT3G16720	3.43711
ATL2	respiratory burst involved in defense response
ATL2	protein targeting to membrane
ATL2	detection of biotic stimulus
ATL2	response to wounding
ATL2	response to mechanical stimulus
ATL2	systemic acquired resistance, salicylic acid mediated signaling pathway
ATL2	jasmonic acid mediated signaling pathway
ATL2	response to chitin
ATL2	regulation of hydrogen peroxide metabolic process
ATL2	regulation of plant-type hypersensitive response
ATL2	negative regulation of defense response
ATL2	intracellular signal transduction
ATL2	defense response to bacterium
ATL2	defense response to fungus
15
ERF6	respiratory burst involved in defense response	AT4G17490	4.82732
ERF6	ethylene-activated signaling pathway
ERF6	response to chitin
ERF6	intracellular signal transduction
HSFA4A	respiratory burst involved in defense response	AT4G18880	4.27608
HSFA4A	intracellular signal transduction
HSFA4A	response to chitin
3
ERF5	respiratory burst involved in defense response	AT5G47230	3.50359
ERF5	ethylene-activated signaling pathway
ERF5	response to chitin
ERF5	intracellular signal transduction
4
CZF1	respiratory burst involved in defense response	AT2G40140	2.94664
CZF1	protein targeting to membrane
CZF1	salicylic acid mediated signaling pathway
CZF1	response to chitin
CZF1	regulation of plant-type hypersensitive response
CZF1	endoplasmic reticulum unfolded protein response
CZF1	intracellular signal transduction
CZF1	negative regulation of programmed cell death
CZF1	defense response to fungus
9
TET8	response to wounding	AT2G23810	3.56022
TET8	response to mechanical stimulus
TET8	ethylene biosynthetic process
TET8	defense response to fungus
TET8	response to chitin
5
TME3 32 dpi
WRKY40	MAPK cascade	AT1G80840	2.17399
WRKY40	respiratory burst involved in defense response
WRKY40	protein targeting to membrane
WRKY40	response to wounding
WRKY40	jasmonic acid biosynthetic process
WRKY40	response to ethylene
WRKY40	abscisic acid-activated signaling pathway
WRKY40	response to salicylic acid
WRKY40	response to jasmonic acid
WRKY40	systemic acquired resistance, salicylic acid mediated signaling pathway
WRKY40	salicylic acid mediated signaling pathway
WRKY40	regulation of plant-type hypersensitive response
WRKY40	endoplasmic reticulum unfolded protein response
WRKY40	jasmonic acid mediated signaling pathway
WRKY40	ethylene-activated signaling pathway
WRKY40	response to chitin
WRKY40	negative regulation of defense response
WRKY40	intracellular signal transduction
WRKY40	negative regulation of programmed cell death
WRKY40	regulation of multi-organism process
WRKY40	regulation of immune response
WRKY40	defense response to fungus
22
WRKY70	MAPK cascade	AT3G56400	1.72262
WRKY70	respiratory burst involved in defense response
WRKY70	protein targeting to membrane
WRKY70	systemic acquired resistance
WRKY70	response to salicylic acid
WRKY70	response to jasmonic acid
WRKY70	systemic acquired resistance, salicylic acid mediated signaling pathway
WRKY70	salicylic acid mediated signaling pathway
WRKY70	jasmonic acid mediated signaling pathway
WRKY70	response to chitin
WRKY70	regulation of plant-type hypersensitive response
WRKY70	negative regulation of defense response
WRKY70	negative regulation of programmed cell death
WRKY70	regulation of multi-organism process
WRKY70	regulation of innate immune response
WRKY70	defense response to fungus
16
ERF-1	respiratory burst involved in defense response	AT4G17500	1.83519
ERF-1	response to water deprivation
ERF-1	response to ethylene
ERF-1	abscisic acid-activated signaling pathway
ERF-1	ethylene-activated signaling pathway
ERF-1	response to chitin
ERF-1	intracellular signal transduction
ERF-1	hyperosmotic salinity response
8
JAZ1	MAPK cascade	AT1G19180	1.87406
JAZ1	protein targeting to membrane
JAZ1	response to water deprivation
JAZ1	response to wounding
JAZ1	jasmonic acid biosynthetic process
JAZ1	response to ethylene
JAZ1	abscisic acid-activated signaling pathway
JAZ1	response to jasmonic acid
JAZ1	systemic acquired resistance, salicylic acid mediated signaling pathway
JAZ1	salicylic acid mediated signaling pathway
JAZ1	jasmonic acid mediated signaling pathway
JAZ1	response to chitin
JAZ1	regulation of plant-type hypersensitive response
JAZ1	endoplasmic reticulum unfolded protein response
JAZ1	negative regulation of defense response
JAZ1	intracellular signal transduction
JAZ1	hyperosmotic salinity response
JAZ1	negative regulation of programmed cell death
JAZ1	defense response to fungus	AT1G19180	1.87406
19

## Sheet: GOs DE gene partners
T200 12 dpi		Arabidopsis homolog	Log2 fold change
WRKY53	response to chitin	AT4G23810	3.11448
AT1G23710	response to chitin	AT1G23710	3.22273
WRKY33	response to chitin	AT2G38470	2.93383
ATL2	response to chitin	AT3G16720	2.60458
T200 32 dpi
WRKY53	MAPK cascade	AT4G23810	3.12648
ATL2	MAPK cascade	AT3G16720	3.91101
MPK3	MAPK cascade	AT3G45640	3.09594
WRKY33	MAPK cascade	AT2G38470	3.32012
SYP121	MAPK cascade	AT3G11820	3.60849
CAF1b	MAPK cascade	AT5G22250	4.15262
MPK3	response to hypoxia	AT3G45640	3.09594
ERF6	respiratory burst involved in defense response	AT4G17490	6.18977
AT1G23710	respiratory burst involved in defense response	AT1G23710	3.93519
CZF1	respiratory burst involved in defense response	AT2G40140	2.84974
CAF1b	respiratory burst involved in defense response	AT5G22250	4.15262
SYP121	respiratory burst involved in defense response	AT3G11820	3.60849
WRKY33	respiratory burst involved in defense response	AT2G38470	3.32012
ATL2	respiratory burst involved in defense response	AT3G16720	3.91101
STZ	respiratory burst involved in defense response	AT1G27730	3.10328
ERF5	respiratory burst involved in defense response	AT5G47230	6.30785
ATL2	protein targeting to membrane	AT3G16720	3.91101
WRKY33	protein targeting to membrane	AT2G38470	3.32012
CZF1	protein targeting to membrane	AT2G40140	2.84974
SYP121	protein targeting to membrane	AT3G11820	3.60849
WRKY53	protein targeting to membrane	AT4G23810	3.12648
AR781	protein targeting to membrane	AT2G26530	2.83481
MPK3	protein targeting to membrane	AT3G45640	3.09594
MPK3	response to oxidative stress	AT3G45640	3.09594
STZ	response to oxidative stress	AT1G27730	3.10328
STZ	response to water deprivation	AT1G27730	3.10328
WRKY33	response to water deprivation	AT2G38470	3.32012
SYP121	response to water deprivation	AT3G11820	3.60849
MPK3	detection of biotic stimulus	AT3G45640	3.09594
SYP121	detection of biotic stimulus	AT3G11820	3.60849
ATL2	detection of biotic stimulus	AT3G16720	3.91101
WRKY33	detection of biotic stimulus	AT2G38470	3.32012
WRKY53	detection of biotic stimulus	AT4G23810	3.12648
STZ	response to wounding	AT1G27730	3.10328
ATL2	response to wounding	AT3G16720	3.91101
SYP121	response to wounding	AT3G11820	3.60849
MPK3	response to wounding	AT3G45640	3.09594
AR781	response to wounding	AT2G26530	2.83481
TET8	response to wounding	AT2G23810	2.92876
ATL2	response to mechanical stimulus	AT3G16720	3.91101
STZ	response to mechanical stimulus	AT1G27730	3.10328
AT1G23710	response to mechanical stimulus	AT1G23710	3.93519
AR781	response to mechanical stimulus	AT2G26530	2.83481
TET8	response to mechanical stimulus	AT2G23810	2.92876
AR781	response to absence of light	AT2G26530	2.83481
CAF1b	ethylene biosynthetic process	AT5G22250	4.15262
TET8	ethylene biosynthetic process	AT2G23810	2.92876
STZ	jasmonic acid biosynthetic process	AT1G27730	3.10328
STZ	response to ethylene	AT1G27730	3.10328
SYP121	response to ethylene	AT3G11820	3.60849
MPK3	abscisic acid-activated signaling pathway	AT3G45640	3.09594
CAF1b	abscisic acid-activated signaling pathway	AT5G22250	4.15262
SYP121	abscisic acid-activated signaling pathway	AT3G11820	3.60849
STZ	abscisic acid-activated signaling pathway	AT1G27730	3.10328
WRKY53	response to salicylic acid	AT4G23810	3.12648
STZ	response to jasmonic acid	AT1G27730	3.10328
SYP121	response to jasmonic acid	AT3G11820	3.60849
SYP121	systemic acquired resistance, salicylic acid mediated signaling pathway	AT3G11820	3.60849
WRKY53	systemic acquired resistance, salicylic acid mediated signaling pathway	AT4G23810	3.12648
MPK3	systemic acquired resistance, salicylic acid mediated signaling pathway	AT3G45640	3.09594
WRKY33	systemic acquired resistance, salicylic acid mediated signaling pathway	AT2G38470	3.32012
ATL2	systemic acquired resistance, salicylic acid mediated signaling pathway	AT3G16720	3.91101
SYP121	salicylic acid mediated signaling pathway	AT3G11820	3.60849
AR781	salicylic acid mediated signaling pathway	AT2G26530	2.83481
MPK3	salicylic acid mediated signaling pathway	AT3G45640	3.09594
CZF1	salicylic acid mediated signaling pathway	AT2G40140	2.84974
WRKY33	salicylic acid mediated signaling pathway	AT2G38470	3.32012
WRKY53	jasmonic acid mediated signaling pathway	AT4G23810	3.12648
MPK3	jasmonic acid mediated signaling pathway	AT3G45640	3.09594
SYP121	jasmonic acid mediated signaling pathway	AT3G11820	3.60849
WRKY33	jasmonic acid mediated signaling pathway	AT2G38470	3.32012
AR781	jasmonic acid mediated signaling pathway	AT2G26530	2.83481
ATL2	jasmonic acid mediated signaling pathway	AT3G16720	3.91101
ERF6	ethylene-activated signaling pathway	AT4G17490	6.18977
ERF5	ethylene-activated signaling pathway	AT5G47230	6.30785
AT1G23710	ethylene-activated signaling pathway	AT1G23710	3.93519
STZ	ethylene-activated signaling pathway	AT1G27730	3.10328
CAF1b	ethylene-activated signaling pathway	AT5G22250	4.15262
AT1G23710	response to chitin	AT1G23710	3.93519
ERF6	response to chitin	AT4G17490	6.18977
STZ	response to chitin	AT1G27730	3.10328
ATL2	response to chitin	AT3G16720	3.91101
TET8	response to chitin	AT2G23810	2.92876
WRKY33	response to chitin	AT2G38470	3.32012
AR781	response to chitin	AT2G26530	2.83481
SYP121	response to chitin	AT3G11820	3.60849
CZF1	response to chitin	AT2G40140	2.84974
MPK3	response to chitin	AT3G45640	3.09594
CAF1b	response to chitin	AT5G22250	4.15262
ERF5	response to chitin	AT5G47230	6.30785
WRKY53	response to chitin	AT4G23810	3.12648
MPK3	response to UV-B	AT3G45640	3.09594
ATL2	regulation of hydrogen peroxide metabolic process	AT3G16720	3.91101
WRKY33	regulation of hydrogen peroxide metabolic process	AT2G38470	3.32012
MPK3	regulation of hydrogen peroxide metabolic process	AT3G45640	3.09594
WRKY53	regulation of hydrogen peroxide metabolic process	AT4G23810	3.12648
SYP121	regulation of hydrogen peroxide metabolic process	AT3G11820	3.60849
WRKY33	regulation of plant-type hypersensitive response	AT2G38470	3.32012
SYP121	regulation of plant-type hypersensitive response	AT3G11820	3.60849
CZF1	regulation of plant-type hypersensitive response	AT2G40140	2.84974
ATL2	regulation of plant-type hypersensitive response	AT3G16720	3.91101
AR781	regulation of plant-type hypersensitive response	AT2G26530	2.83481
WRKY53	regulation of plant-type hypersensitive response	AT4G23810	3.12648
MPK3	regulation of plant-type hypersensitive response	AT3G45640	3.09594
SYP121	endoplasmic reticulum unfolded protein response	AT3G11820	3.60849
CZF1	endoplasmic reticulum unfolded protein response	AT2G40140	2.84974
SYP121	negative regulation of defense response	AT3G11820	3.60849
ATL2	negative regulation of defense response	AT3G16720	3.91101
WRKY33	negative regulation of defense response	AT2G38470	3.32012
MPK3	negative regulation of defense response	AT3G45640	3.09594
WRKY53	negative regulation of defense response	AT4G23810	3.12648
ERF6	intracellular signal transduction	AT4G17490	6.18977
ATL2	intracellular signal transduction	AT3G16720	3.91101
ERF5	intracellular signal transduction	AT5G47230	6.30785
MPK3	intracellular signal transduction	AT3G45640	3.09594
CAF1b	intracellular signal transduction	AT5G22250	4.15262
WRKY33	intracellular signal transduction	AT2G38470	3.32012
STZ	intracellular signal transduction	AT1G27730	3.10328
AT1G23710	intracellular signal transduction	AT1G23710	3.93519
CZF1	intracellular signal transduction	AT2G40140	2.84974
SYP121	hyperosmotic salinity response	AT3G11820	3.60849
STZ	hyperosmotic salinity response	AT1G27730	3.10328
SYP121	defense response to bacterium	AT3G11820	3.60849
WRKY53	defense response to bacterium	AT4G23810	3.12648
WRKY33	defense response to bacterium	AT2G38470	3.32012
ATL2	defense response to bacterium	AT3G16720	3.91101
CAF1b	defense response to bacterium	AT5G22250	4.15262
MPK3	defense response to bacterium	AT3G45640	3.09594
SYP121	negative regulation of programmed cell death	AT3G11820	3.60849
CZF1	negative regulation of programmed cell death	AT2G40140	2.84974
WRKY33	negative regulation of programmed cell death	AT2G38470	3.32012
MPK3	negative regulation of programmed cell death	AT3G45640	3.09594
SYP121	regulation of multi-organism process	AT3G11820	3.60849
ATL2	regulation of multi-organism process	AT3G16720	3.91101
WRKY53	regulation of multi-organism process	AT4G23810	3.12648
WRKY33	regulation of multi-organism process	AT2G38470	3.32012
MPK3	regulation of multi-organism process	AT3G45640	3.09594
CZF1	defense response to fungus	AT2G40140	2.84974
SYP121	defense response to fungus	AT3G11820	3.60849
ATL2	defense response to fungus	AT3G16720	3.91101
WRKY53	defense response to fungus	AT4G23810	3.12648
WRKY33	defense response to fungus	AT2G38470	3.32012
TET8	defense response to fungus	AT2G23810	2.92876
MPK3	defense response to fungus	AT3G45640	3.09594
T200 67 dpi
AT4G34150	STZ	AT4G34150
WRKY33	MAPK cascade	AT2G38470	2.92518
WRKY70	MAPK cascade	AT3G56400	3.60985
SYP121	MAPK cascade	AT3G11820	3.06153
MPK3	MAPK cascade	AT3G45640	3.83046
ATL2	MAPK cascade	AT3G16720	3.43711
WRKY53	MAPK cascade	AT4G23810	3.50639
ERF6	respiratory burst involved in defense response	AT4G17490	4.82732
HSFA4A	respiratory burst involved in defense response	AT4G18880	4.27608
WRKY33	respiratory burst involved in defense response	AT2G38470	2.92518
ATL2	respiratory burst involved in defense response	AT3G16720	3.43711
WRKY70	respiratory burst involved in defense response	AT3G56400	3.60985
ERF5	respiratory burst involved in defense response	AT5G47230	3.50359
STZ	respiratory burst involved in defense response	AT1G27730	3.388
CZF1	respiratory burst involved in defense response	AT2G40140	2.94664
SYP121	respiratory burst involved in defense response	AT3G11820	3.06153
CZF1	protein targeting to membrane	AT2G40140	2.94664
WRKY33	protein targeting to membrane	AT2G38470	2.92518
MPK3	protein targeting to membrane	AT3G45640	3.83046
SYP121	protein targeting to membrane	AT3G11820	3.06153
WRKY70	protein targeting to membrane	AT3G56400	3.60985
ATL2	protein targeting to membrane	AT3G16720	3.43711
WRKY53	protein targeting to membrane	AT4G23810	3.50639
SYP121	nucleotide transport	AT3G11820	3.06153
MPK3	response to oxidative stress	AT3G45640	3.83046
STZ	response to oxidative stress	AT1G27730	3.388
STZ	response to water deprivation	AT1G27730	3.388
SYP121	response to water deprivation	AT3G11820	3.06153
WRKY33	response to water deprivation	AT2G38470	2.92518
WRKY70	detection of biotic stimulus	AT3G56400	3.60985
WRKY53	detection of biotic stimulus	AT4G23810	3.50639
MPK3	detection of biotic stimulus	AT3G45640	3.83046
WRKY33	detection of biotic stimulus	AT2G38470	2.92518
SYP121	detection of biotic stimulus	AT3G11820	3.06153
ATL2	detection of biotic stimulus	AT3G16720	3.43711
TET8	response to wounding	AT2G23810	3.56022
STZ	response to wounding	AT1G27730	3.388
MPK3	response to wounding	AT3G45640	3.83046
SYP121	response to wounding	AT3G11820	3.06153
ATL2	response to wounding	AT3G16720	3.43711
STZ	response to mechanical stimulus	AT1G27730	3.388
TET8	response to mechanical stimulus	AT2G23810	3.56022
ATL2	response to mechanical stimulus	AT3G16720	3.43711
SYP121	response to insect	AT3G11820	3.06153
WRKY70	response to insect	AT3G56400	3.60985
WRKY70	systemic acquired resistance	AT3G56400	3.60985
TET8	ethylene biosynthetic process	AT2G23810	3.56022
STZ	response to ethylene	AT1G27730	3.388
SYP121	response to ethylene	AT3G11820	3.06153
MPK3	abscisic acid-activated signaling pathway	AT3G45640	3.83046
SYP121	abscisic acid-activated signaling pathway	AT3G11820	3.06153
STZ	abscisic acid-activated signaling pathway	AT1G27730	3.388
WRKY70	response to salicylic acid	AT3G56400	3.60985
WRKY53	response to salicylic acid	AT4G23810	3.50639
SYP121	response to jasmonic acid	AT3G11820	3.06153
STZ	response to jasmonic acid	AT1G27730	3.388
WRKY70	response to jasmonic acid	AT3G56400	3.60985
WRKY70	systemic acquired resistance, salicylic acid mediated signaling pathway	AT3G56400	3.60985
ATL2	systemic acquired resistance, salicylic acid mediated signaling pathway	AT3G16720	3.43711
MPK3	systemic acquired resistance, salicylic acid mediated signaling pathway	AT3G45640	3.83046
WRKY53	systemic acquired resistance, salicylic acid mediated signaling pathway	AT4G23810	3.50639
WRKY33	systemic acquired resistance, salicylic acid mediated signaling pathway	AT2G38470	2.92518
SYP121	systemic acquired resistance, salicylic acid mediated signaling pathway	AT3G11820	3.06153
MPK3	salicylic acid mediated signaling pathway	AT3G45640	3.83046
WRKY70	salicylic acid mediated signaling pathway	AT3G56400	3.60985
CZF1	salicylic acid mediated signaling pathway	AT2G40140	2.94664
SYP121	salicylic acid mediated signaling pathway	AT3G11820	3.06153
WRKY33	salicylic acid mediated signaling pathway	AT2G38470	2.92518
WRKY70	jasmonic acid mediated signaling pathway	AT3G56400	3.60985
WRKY53	jasmonic acid mediated signaling pathway	AT4G23810	3.50639
ATL2	jasmonic acid mediated signaling pathway	AT3G16720	3.43711
MPK3	jasmonic acid mediated signaling pathway	AT3G45640	3.83046
SYP121	jasmonic acid mediated signaling pathway	AT3G11820	3.06153
WRKY33	jasmonic acid mediated signaling pathway	AT2G38470	2.92518
ERF5	ethylene-activated signaling pathway	AT5G47230	3.50359
ERF6	ethylene-activated signaling pathway	AT4G17490	4.82732
STZ	ethylene-activated signaling pathway	AT1G27730	3.388
SYP121	positive regulation of flavonoid biosynthetic process	AT3G11820	3.06153
SYP121	regulation of stomatal movement	AT3G11820	3.06153
WRKY70	camalexin biosynthetic process	AT3G56400	3.60985
WRKY33	camalexin biosynthetic process	AT2G38470	2.92518
MPK3	camalexin biosynthetic process	AT3G45640	3.83046
ERF6	response to chitin	AT4G17490	4.82732
SYP121	response to chitin	AT3G11820	3.06153
CZF1	response to chitin	AT2G40140	2.94664
STZ	response to chitin	AT1G27730	3.388
MPK3	response to chitin	AT3G45640	3.83046
HSFA4A	response to chitin	AT4G18880	4.27608
WRKY53	response to chitin	AT4G23810	3.50639
WRKY70	response to chitin	AT3G56400	3.60985
ERF5	response to chitin	AT5G47230	3.50359
ATL2	response to chitin	AT3G16720	3.43711
WRKY33	response to chitin	AT2G38470	2.92518
TET8	response to chitin	AT2G23810	3.56022
MPK3	response to UV-B	AT3G45640	3.83046
SYP121	regulation of hydrogen peroxide metabolic process	AT3G11820	3.06153
WRKY53	regulation of hydrogen peroxide metabolic process	AT4G23810	3.50639
WRKY33	regulation of hydrogen peroxide metabolic process	AT2G38470	2.92518
ATL2	regulation of hydrogen peroxide metabolic process	AT3G16720	3.43711
WRKY70	regulation of hydrogen peroxide metabolic process	AT3G56400	3.60985
MPK3	regulation of hydrogen peroxide metabolic process	AT3G45640	3.83046
SYP121	regulation of plant-type hypersensitive response	AT3G11820	3.06153
WRKY33	regulation of plant-type hypersensitive response	AT2G38470	2.92518
ATL2	regulation of plant-type hypersensitive response	AT3G16720	3.43711
CZF1	regulation of plant-type hypersensitive response	AT2G40140	2.94664
MPK3	regulation of plant-type hypersensitive response	AT3G45640	3.83046
WRKY53	regulation of plant-type hypersensitive response	AT4G23810	3.50639
WRKY70	regulation of plant-type hypersensitive response	AT3G56400	3.60985
SYP121	ammonium transport	AT3G11820	3.06153
SYP121	basic amino acid transport	AT3G11820	3.06153
SYP121	endoplasmic reticulum unfolded protein response	AT3G11820	3.06153
CZF1	endoplasmic reticulum unfolded protein response	AT2G40140	2.94664
WRKY53	negative regulation of defense response	AT4G23810	3.50639
MPK3	negative regulation of defense response	AT3G45640	3.83046
SYP121	negative regulation of defense response	AT3G11820	3.06153
ATL2	negative regulation of defense response	AT3G16720	3.43711
WRKY33	negative regulation of defense response	AT2G38470	2.92518
WRKY70	negative regulation of defense response	AT3G56400	3.60985
ATL2	intracellular signal transduction	AT3G16720	3.43711
STZ	intracellular signal transduction	AT1G27730	3.388
ERF6	intracellular signal transduction	AT4G17490	4.82732
MPK3	intracellular signal transduction	AT3G45640	3.83046
HSFA4A	intracellular signal transduction	AT4G18880	4.27608
CZF1	intracellular signal transduction	AT2G40140	2.94664
ERF5	intracellular signal transduction	AT5G47230	3.50359
WRKY33	intracellular signal transduction	AT2G38470	2.92518
SYP121	hyperosmotic salinity response	AT3G11820	3.06153
STZ	hyperosmotic salinity response	AT1G27730	3.388
WRKY33	defense response to bacterium	AT2G38470	2.92518
SYP121	defense response to bacterium	AT3G11820	3.06153
WRKY70	defense response to bacterium	AT3G56400	3.60985
WRKY53	defense response to bacterium	AT4G23810	3.50639
MPK3	defense response to bacterium	AT3G45640	3.83046
ATL2	defense response to bacterium	AT3G16720	3.43711
SYP121	negative regulation of programmed cell death	AT3G11820	3.06153
MPK3	negative regulation of programmed cell death	AT3G45640	3.83046
WRKY33	negative regulation of programmed cell death	AT2G38470	2.92518
WRKY70	negative regulation of programmed cell death	AT3G56400	3.60985
CZF1	negative regulation of programmed cell death	AT2G40140	2.94664
WRKY70	regulation of innate immune response	AT3G56400	3.60985
SYP121	defense response to fungus	AT3G11820	3.06153
WRKY70	defense response to fungus	AT3G56400	3.60985
WRKY33	defense response to fungus	AT2G38470	2.92518
TET8	defense response to fungus	AT2G23810	3.56022
CZF1	defense response to fungus	AT2G40140	2.94664
MPK3	defense response to fungus	AT3G45640	3.83046
WRKY53	defense response to fungus	AT4G23810	3.50639
ATL2	defense response to fungus	AT3G16720	3.43711
MPK3	regulation of stomatal complex development	AT3G45640	3.83046
TME3 32 dpi
JAZ1	MAPK cascade	AT1G19180	1.87406
WRKY40	MAPK cascade	AT1G80840	2.17399
WRKY70	MAPK cascade	AT3G56400	1.72262
WRKY70	respiratory burst involved in defense response	AT3G56400	1.72262
WRKY40	respiratory burst involved in defense response	AT1G80840	2.17399
ERF-1	respiratory burst involved in defense response	AT4G17500	1.83519
JAZ1	protein targeting to membrane	AT1G19180	1.87406
WRKY70	protein targeting to membrane	AT3G56400	1.72262
WRKY40	protein targeting to membrane	AT1G80840	2.17399
ERF-1	response to water deprivation	AT4G17500	1.83519
JAZ1	response to water deprivation	AT1G19180	1.87406
JAZ1	response to wounding	AT1G19180	1.87406
WRKY40	response to wounding	AT1G80840	2.17399
WRKY70	systemic acquired resistance	AT3G56400	1.72262
WRKY40	jasmonic acid biosynthetic process	AT1G80840	2.17399
JAZ1	jasmonic acid biosynthetic process	AT1G19180	1.87406
ERF-1	response to ethylene	AT4G17500	1.83519
WRKY40	response to ethylene	AT1G80840	2.17399
JAZ1	response to ethylene	AT1G19180	1.87406
ERF-1	abscisic acid-activated signaling pathway	AT4G17500	1.83519
WRKY40	abscisic acid-activated signaling pathway	AT1G80840	2.17399
JAZ1	abscisic acid-activated signaling pathway	AT1G19180	1.87406
WRKY40	response to salicylic acid	AT1G80840	2.17399
WRKY70	response to salicylic acid	AT3G56400	1.72262
JAZ1	response to jasmonic acid	AT1G19180	1.87406
WRKY40	response to jasmonic acid	AT1G80840	2.17399
WRKY70	response to jasmonic acid	AT3G56400	1.72262
WRKY40	systemic acquired resistance, salicylic acid mediated signaling pathway	AT1G80840	2.17399
JAZ1	systemic acquired resistance, salicylic acid mediated signaling pathway	AT1G19180	1.87406
WRKY70	systemic acquired resistance, salicylic acid mediated signaling pathway	AT3G56400	1.72262
WRKY40	salicylic acid mediated signaling pathway	AT1G80840	2.17399
WRKY70	salicylic acid mediated signaling pathway	AT3G56400	1.72262
JAZ1	salicylic acid mediated signaling pathway	AT1G19180	1.87406
WRKY70	jasmonic acid mediated signaling pathway	AT3G56400	1.72262
JAZ1	jasmonic acid mediated signaling pathway	AT1G19180	1.87406
WRKY40	jasmonic acid mediated signaling pathway	AT1G80840	2.17399
WRKY40	ethylene-activated signaling pathway	AT1G80840	2.17399
ERF-1	ethylene-activated signaling pathway	AT4G17500	1.83519
ERF-1	response to chitin	AT4G17500	1.83519
WRKY40	response to chitin	AT1G80840	2.17399
JAZ1	response to chitin	AT1G19180	1.87406
WRKY70	response to chitin	AT3G56400	1.72262
WRKY70	regulation of plant-type hypersensitive response	AT3G56400	1.72262
JAZ1	regulation of plant-type hypersensitive response	AT1G19180	1.87406
WRKY40	regulation of plant-type hypersensitive response	AT1G80840	2.17399
WRKY40	endoplasmic reticulum unfolded protein response	AT1G80840	2.17399
JAZ1	endoplasmic reticulum unfolded protein response	AT1G19180	1.87406
JAZ1	negative regulation of defense response	AT1G19180	1.87406
WRKY70	negative regulation of defense response	AT3G56400	1.72262
WRKY40	negative regulation of defense response	AT1G80840	2.17399
WRKY40	intracellular signal transduction	AT1G80840	2.17399
ERF-1	intracellular signal transduction	AT4G17500	1.83519
JAZ1	intracellular signal transduction	AT1G19180	1.87406
JAZ1	hyperosmotic salinity response	AT1G19180	1.87406
ERF-1	hyperosmotic salinity response	AT4G17500	1.83519
JAZ1	negative regulation of programmed cell death	AT1G19180	1.87406
WRKY70	negative regulation of programmed cell death	AT3G56400	1.72262
WRKY40	negative regulation of programmed cell death	AT1G80840	2.17399
WRKY70	regulation of multi-organism process	AT3G56400	1.72262
WRKY40	regulation of multi-organism process	AT1G80840	2.17399
WRKY70	regulation of innate immune response	AT3G56400	1.72262
WRKY40	regulation of immune response	AT1G80840	2.17399
WRKY70	defense response to fungus	AT3G56400	1.72262
WRKY40	defense response to fungus	AT1G80840	2.17399
JAZ1	defense response to fungus	AT1G19180	1.87406
