# Supplementary material for: WRKY Transcription Factors in Cassava Contribute to Regulation of Tolerance and Susceptibility to Cassava Mosaic Disease through Stress Responses
Source: Viruses. 2021 Sep 13;13(9):1820. doi: 10.3390/v13091820 (PMC8473359; doi:10.3390/v13091820)
Supplement: Supplementary file 1 [file viruses-13-01820-s001.zip › Final Supplementary Tables, Figures and Legends/Supplementary Table S4.xlsx]

## Sheet: Sheet3
Supplementary Table S4 AtWRKY28 interacting protein partners & their functions
		Expression	Gene Functions
WRKY28	AT4G18170	-4.954
WRKY Interacting Partners
PBS3	AT5G13320		This enzyme is involved in disease-resistance signaling. It is required for the accumulation of salicylic acid, activation of defense responses, and resistance to Pseudomonas syringae. Salicylic acid can decrease this enzyme's activity in vitro and may act as a competitive inhibitor.
CDPK2	AT1G35670		Encodes a Ca(2+)-dependent, calmodulin-independent protein kinase that is rapidly induced by drought and high-salt stress but not by low-temperature stress or heat stress. Positive regulator of ABA signaling. Phosphorylates ABA responsive transcription factors ABF1 and ABF4.
TCP9	AT2G45680		TCP family transcription factor; negative regulation of leaf senescence, regulation of cell size, regulation of transcription, DNA-templated, root development
EDS16	AT1G74710		ENHANCED DISEASE SUSCEPTIBILITY TO ERYSIPHE ORONTII 16;Encodes a protein with isochorismate synthase activity. Mutants fail to accumulate salicylic acid. Its function may be redundant with that of ISOCHORISMATE SYNTHASE 1 (ICS2) (AT1G18870)
TCP8	AT1G58100		Belongs to the TCP transcription factor family known to bind site II elements in promoter regions. Modulates GA-dependent stamen filament elongation by direct activation of SAUR63 subfamily genes through conserved target sites in their promoters.
TCP5	AT5G60970		TCP gene involved in heterochronic control of leaf differentiation. Transcription factor which controls thermomorphogenesis by positively regulating PIF4 activity.
TCP20	AT3G27010		ARABIDOPSIS THALIANA TEOSINTE BRANCHED 1, CYCLOIDEA, PCF (TCP)-DOMAIN FAMILY PROTEIN 20;Belongs to a TCP protein transcription factor family. Members of this family contain a predicted basic-helix-loop-helix domain involved in DNA binding. Related to rice PCF1 and PCF2 genes. Binds to the GCCCR element of CYCB1;1. Involved in regulation of expression of cell cycle control and ribosomal protein ge…
CPK4	AT4G09570		CALCIUM-DEPENDENT PROTEIN KINASE 4; Encodes a member of Calcium Dependent Protein Kinase (CDPK) gene family.Positive regulator of ABA signaling. Phosphorylates ABA responsive transcription factors ABF1 and ABF4.
AT5G51910	AT5G51910		TCP family transcription factor; regulation of defense response, regulation of transcription, DNA-templated; nucleus located
TCP3	AT1G53230		TEOSINTE BRANCHED 1, CYCLOIDEA AND PCF TRANSCRIPTION FACTOR 3; Encodes a member of a recently identified plant transcription factor family that includes Teosinte branched 1, Cycloidea 1, and proliferating cell nuclear antigen (PCNA) factors, PCF1 and 2. Regulated by miR319. Involved in heterochronic regulation of leaf differentiation.
SARD1	AT1G73805		DNA-binding transcription factor activity, calmodulin binding, protein binding, sequence-specific DNA binding
CBP60G	AT5G26920		DNA-binding transcription factor activity, calmodulin binding, sequence-specific DNA binding. CBP60g and SARD1 play partially redundant critical roles in salicylic acid signaling
