# Supplementary material for: WRKY Transcription Factors in Cassava Contribute to Regulation of Tolerance and Susceptibility to Cassava Mosaic Disease through Stress Responses
Source: Viruses. 2021 Sep 13;13(9):1820. doi: 10.3390/v13091820 (PMC8473359; doi:10.3390/v13091820)
Supplement: Supplementary file 1 [file viruses-13-01820-s001.zip › Final Supplementary Tables, Figures and Legends/Supplementary Table S5.xlsx]

## Sheet: S&T GVIs
Table S5 Log2 fold expression of AtWRKY homologs in susceptible and resistant plant host-geminivirus infections at different stages of infection
At WRKY homologs	Susceptible plants
	Cassava						Arabidopsis				Tomato			Potato
	SACMV			CBSV		UCBSV	SACMV			CalCuV	TYLCV	TYLCSV		TolCNDV
	Early	Middle	Late	Early	Late	Late	Early	Middle	Late	Early	Early	Early	Late	Late	Total	At Homologs	Up	Down
WRKY70	-1.844		2.20/3.61	2.58	-1.51					1.33	-4.14	-0.57		5.36	8	WRKY70	4	4
WRKY40				2.49						0.23	-4.13	1.38	-0.76	5.9	6	WRKY40	4	2
WRKY53	3.11448	3.12648	3.51/2.20							0.45	-5.98			-2.15	6	WRKY53	2	4
WRKY22				2.45			-2.89	-2.42			-5.8				4	WRKY22	1	3
WRKY33	2.93383	3.32/2.57	2.93/2.44			1.78				0.64	-4.39				6	WRKY33	1	5
WRKY41	2.82696	3.20307	3.32634								-4.21	-1.53			5	WRKY41	2	3
WRKY07	-3.17317			2.58											2	WRKY07	1	1
WRKY02											-4.44	0.56		2.02	3	WRKY02	2	1
WRKY06				2.02		3.07								2.61	3	WRKY06	3	0
WRKY28					4.76				-2.78					2.07	3	WRKY28	2	1
WRKY57					1.54										1	WRKY57	1	0
WRKY12		-7.76222							-2.03						2	WRKY12	0	2
WRKY23						4.62									1	WRKY23	1	0
WRKY72					4.53										1	WRKY72	1	0
WRKY11											-4.21055				1	WRKY11	0	1
WRKY27				6.98											1	WRKY27	1	0
WRKY30											-3.84224				1	WRKY30	0	1
WRKY65						1.56									1	WRKY65	1	0
18	5	4	4	6	4	4	1	1	2	4	9	4	1	6	55
Log2 fold expression of AtWRKY homologs in resistant/tolerant plant host-geminivirus infections at different stages of infection
AtWRKY homologs	Tolerant or resistant plants
	Cassava						Tomato	Potato
	SACMV			CBSV		UCBSV	TYLCV	TolCNDV
	Early	Middle	Late	Early	Late	Late	Early	Late	Total			Up	Down
WRKY40		2.17			1.88	-3.78			3		WRKY40	2	1
WRKY06					3.13				1		WRKY06	1	0
WRKY07				2.32193					1		WRKY07	1	0
WRKY11					-1.16	-1.2			2		WRKY11	0	2
WRKY21				-3.99521					1		WRKY21	0	1
WRKY22				3.16952					1		WRKY22	1	0
WRKY23					2.79				1		WRKY23	1	0
WRKY27				7.36585					1		WRKY27	1	0
WRKY33					-1.27				1		WRKY33	0	1
WRKY53						-3.13			1		WRKY53	0	1
WRKY70		1.72				-3.15			2		WRKY70	1	1
WRKY72					1.58				1		WRKY72	1	0
WRKY28			-4.95						1		WRKY28	0	1
WRKY41		2.03							1		WRKY41	1	0
14									18
